# Supplementary material for: Reaction of SO 3 with H 2 SO 4 and Its Implication for Aerosol Particle Formation in the Gas Phase and at the Air-Water Interface
Source: Copernicus journal article supplement (doi:10.5194/egusphere-2023-2009), 2023-10-13
Supplement: Supplementary file 1 [file egusphere-2023-2009-supplement.pdf]

# Supporting information

-for-

## Reaction of SO<sub>3</sub> with H<sub>2</sub>SO<sub>4</sub> and Its Implication for Aerosol

### Particle Formation in the Gas Phase and at the Air-Water

#### Interface

Rui Wang <sup>a</sup>, Yang Cheng <sup>a,‡</sup>, Yue Hu <sup>a,‡</sup>, Shasha Chen <sup>a</sup>, Xiaokai Guo <sup>c</sup>, Fengmin Song <sup>a</sup>, Hao Li <sup>b,\*</sup>, Tianlei Zhang <sup>a,\*</sup>

<sup>a</sup> Shaanxi Key Laboratory of Catalysis, School of Chemical & Environment Science, Shaanxi University of Technology, Hanzhong, Shaanxi 723001, P. R. China

<sup>b</sup> State Key Joint Laboratory of Environment Simulation and Pollution Control, Research Center for Eco-environmental Sciences, Chinese Academy of Sciences, Beijing, 100085, China

<sup>c</sup> Department of Applied Chemistry, Yuncheng University, Yuncheng, Shanxi 044000, China

| S. NO | Caption                                                                                                                                                                                                                                                                                                                                                                                                                                                                                                                                                       |
|-------|---------------------------------------------------------------------------------------------------------------------------------------------------------------------------------------------------------------------------------------------------------------------------------------------------------------------------------------------------------------------------------------------------------------------------------------------------------------------------------------------------------------------------------------------------------------|
| S4    | <b>Fig. S1</b> Schematic energy diagrams for the formation of H <sub>2</sub> SO <sub>4</sub> from the SO <sub>3</sub> + H <sub>2</sub> O reaction without and with H <sub>2</sub> O at the CCSD(T)-F12/cc-pVDZ-F12//M06-2X/6-311++G(2df,2pd) level of theory                                                                                                                                                                                                                                                                                                  |
| S5    | <b>Table S1</b> Relative energies ( $\Delta E$ and $\Delta(E + ZPE)$ /(kcal·mol <sup>-1</sup> )), enthalpies ( $\Delta H$ /(kcal·mol <sup>-1</sup> )), entropy (S(298 K)/(cal·mol <sup>-1</sup> ·K <sup>-1</sup> )) and free energies ( $\Delta G$ (298 K)/(kcal·mol <sup>-1</sup> )) for the reactants, intermediates, transition states and products involved in the reaction of SO <sub>3</sub> + H <sub>2</sub> SO <sub>4</sub> without and with H <sub>2</sub> O along with the hydrolysis reaction of SO <sub>3</sub> without and with H <sub>2</sub> O |
| S6    | <b>Table S2</b> Equilibrium constants (cm <sup>3</sup> ·molecule <sup>-1</sup> ) for SO <sub>3</sub> ···H <sub>2</sub> SO <sub>4</sub> , SO <sub>3</sub> ···H <sub>2</sub> O, H <sub>2</sub> SO <sub>4</sub> ···H <sub>2</sub> O and (H <sub>2</sub> O) <sub>2</sub> within the temperature range of 280-320 K                                                                                                                                                                                                                                                |
| S7    | <b>Table S3</b> Concentrations (molecules·cm <sup>-3</sup> ) of H <sub>2</sub> O and H <sub>2</sub> SO <sub>4</sub> within the temperature range of 280-320 K                                                                                                                                                                                                                                                                                                                                                                                                 |
| S8    | <b>Part 1 The calculations details of high-pressure-limit (HPL) rate constants</b>                                                                                                                                                                                                                                                                                                                                                                                                                                                                            |
| S9    | <b>Table S4</b> The high-pressure limiting rate constants (cm <sup>3</sup> ·molecule <sup>-1</sup> ·s <sup>-1</sup> ) for the reactants to pre-reactive complex process in the SO <sub>3</sub> + H <sub>2</sub> SO <sub>4</sub> reaction without and with H <sub>2</sub> O, and the hydrolysis of SO <sub>3</sub> without and with H <sub>2</sub> O calculated by the master equation within the temperature range of 280-320 K                                                                                                                               |
| S10   | <b>Part 2 The details of Master Equation Solver for Multi-Energy Well Reactions</b>                                                                                                                                                                                                                                                                                                                                                                                                                                                                           |
| S11   | <b>Table S5</b> Rate constants (cm <sup>3</sup> ·molecule <sup>-1</sup> ·s <sup>-1</sup> ) for the hydrolysis of SO <sub>3</sub> without and with H <sub>2</sub> O within the temperature range of 280-320 K                                                                                                                                                                                                                                                                                                                                                  |

\* Corresponding authors. Tel: +86-0916-2641083, Fax: +86-0916-2641083.

E-mail: ztianlei88@163.com (T. L Zhang); lihao2690@163.com (H. Li)

‡ Yang Cheng and Yue Hu contributed equally to this work.

|     |                                                                                                                                                                                                                                                                                                                                                                                                                                                                                                                                                                                                                                                                  |
|-----|------------------------------------------------------------------------------------------------------------------------------------------------------------------------------------------------------------------------------------------------------------------------------------------------------------------------------------------------------------------------------------------------------------------------------------------------------------------------------------------------------------------------------------------------------------------------------------------------------------------------------------------------------------------|
| S12 | <b>Part 3 Calculations of effective rate constants</b>                                                                                                                                                                                                                                                                                                                                                                                                                                                                                                                                                                                                           |
| S13 | <b>Table S6</b> The rate ratio between the $\text{SO}_3 + \text{H}_2\text{SO}_4$ reaction and the hydrolysis of $\text{SO}_3$ within the temperature range of 280-320 K                                                                                                                                                                                                                                                                                                                                                                                                                                                                                          |
| S14 | <b>Fig. S2</b> Snapshot structures taken from the BOMD simulations of $\text{H}_2\text{SO}_4$ reaction at the air-water interface. The white, red and yellow spheres represent H, O and S atoms, respectively.                                                                                                                                                                                                                                                                                                                                                                                                                                                   |
| S15 | <b>Fig. S3</b> Two BOMD trajectories and snapshots for $\text{H}_2\text{O}$ -induced the formation of $\text{S}_2\text{O}_7^{2-} \cdots \text{H}_3\text{O}^+$ ion pair from the reaction of $\text{SO}_3$ with $\text{HSO}_4^-$ at the air-water interface (Top panel: Snapshot structures taken from the BOMD simulations, which illustrate $\text{H}_2\text{O}$ -induced the formation of $\text{S}_2\text{O}_7^{2-} \cdots \text{H}_3\text{O}^+$ ion pair from the reaction of $\text{SO}_3$ with $\text{HSO}_4^-$ at the air-water interface. Lower panel: time evolution of key bond distances (S-O1, O2-H1, and O3-H1) involved in the induced mechanism.) |
| S16 | <b>Fig. S4</b> Two BOMD trajectories and snapshots for the direct $\text{HSO}_4^-$ -mediated formation of $\text{HSO}_4^- \cdots \text{H}_3\text{O}^+$ ion pair at the air water interface (Top panel: Snapshot structures taken from the BOMD simulations, which illustrate the direct $\text{HSO}_4^-$ -mediated formation of $\text{HSO}_4^- \cdots \text{H}_3\text{O}^+$ ion pair at the air water interface. Lower panel: time evolution of key bond distances (S1-O1, O1-H1 and H1-O2) involved in the hydration mechanism.)                                                                                                                               |
| S17 | <b>Fig. S5</b> Two BOMD trajectories and snapshots for the indirect $\text{HSO}_4^-$ -mediated formation of $\text{HSO}_4^- \cdots \text{H}_3\text{O}^+$ ion pair at the air water interface (Top panel: Snapshot structures taken from the BOMD simulations, which illustrate the indirect $\text{HSO}_4^-$ -mediated formation of $\text{HSO}_4^- \cdots \text{H}_3\text{O}^+$ ion pair at the air water interface. Lower panel: time evolution of key bond distances (S1-O1, O1-H1 and H1-O2) involved in the hydration mechanism.)                                                                                                                           |
| S18 | <b>Fig. S6</b> Two BOMD trajectories and snapshots for the deprotonation of $\text{H}_2\text{S}_2\text{O}_7$ at the air water interface (Top panel: Snapshot structures taken from the BOMD simulations, which illustrate the deprotonation of $\text{H}_2\text{S}_2\text{O}_7$ at the air water interface. Lower panel: time evolution of key bond distances (O1-H1, H1-O2, O3-H2 and H2-O4) involved in the hydration mechanism.)                                                                                                                                                                                                                              |
| S19 | <b>Fig. S7</b> The optimized geometrical of $\text{HS}_2\text{O}_7^-$ , $\text{S}_2\text{O}_7^{2-}$ and $\text{HSO}_4^-$ ion at M06-2X/6-311++G(2df,2pd) level of theory                                                                                                                                                                                                                                                                                                                                                                                                                                                                                         |
| S20 | <b>Fig. S8</b> The most stable configurations of the $(\text{SA})_1(\text{A})_1(\text{Acid})_1$ clusters identified at the M06-2X/6-311++G(2df,2pd) level of theory. DSA and SA are the shorthand for disulfuric acid and sulfuric acid, respectively. The lengths of hydrogen bonds are given in Å. (blue = nitrogen, yellow = sulfur, red = oxygen, gray = carbon, and white = hydrogen.)                                                                                                                                                                                                                                                                      |
| S21 | <b>Table S7</b> Gibbs free energy ( $\Delta G$ , kcal·mol <sup>-1</sup> ), equilibrium constant ( $K_{\text{eq}}$ , cm <sup>3</sup> ·molecule <sup>-1</sup> ) and the concentrations of SA, $\text{SO}_3$ and DSA computed at the CCSD(T)-F12/cc-pVDZ-F12//M06-2X/6-311++G(2df,2pd) level of theory                                                                                                                                                                                                                                                                                                                                                              |
| S22 | <b>Fig. S9</b> The most stable configurations of the DSA-SA-A-based clusters identified at the M06-2X/6-311++G(2df,2pd) level of theory. DSA, SA, A are the shorthand for disulfuric acid, sulfuric acid and ammonia, respectively. The lengths of hydrogen bonds are given in Å. (blue = nitrogen, yellow = sulfur, red = oxygen, gray = carbon, and white = hydrogen.)                                                                                                                                                                                                                                                                                         |
| S23 | <b>Table S8</b> The Gibbs free energy $\Delta G$ (kcal·mol <sup>-1</sup> ) of formation of all clusters at pressure of 1 atm and the temperature range of 218.15-298.15 K, calculated at DLPNO-CCSD(T)/aug-cc-pVTZ//M06-2X/6-311++G(2df,2pd) level of theory                                                                                                                                                                                                                                                                                                                                                                                                     |
| S24 | <b>Fig. S10</b> The Gibbs free energy (kcal·mol <sup>-1</sup> ) diagram of $(\text{DSA})_x(\text{SA})_y(\text{A})_z$ ( $z \leq x + y \leq 3$ )                                                                                                                                                                                                                                                                                                                                                                                                                                                                                                                   |

|         |                                                                                                                                                                                                                                                                                                                                                                           |
|---------|---------------------------------------------------------------------------------------------------------------------------------------------------------------------------------------------------------------------------------------------------------------------------------------------------------------------------------------------------------------------------|
|         | clusters at 278.15K and 1 atm. “A” refers to sulfuric acid, “D” refers to disulfuric acid and “N” refers to ammonia                                                                                                                                                                                                                                                       |
| S25     | <b>Part 4 Collision coefficients and evaporation coefficients</b>                                                                                                                                                                                                                                                                                                         |
| S26-S27 | <b>Part 5 Boundary conditions and concentration range</b>                                                                                                                                                                                                                                                                                                                 |
| S28-S29 | <b>Table S9</b> Collision coefficients ( $\beta$ , $\text{cm}^3 \cdot \text{s}^{-1}$ ) for each cluster in the present study                                                                                                                                                                                                                                              |
| S30-S31 | <b>Table S10</b> Evaporation rates ( $\text{s}^{-1}$ ) of the studied clusters at different temperatures of 298.15, 278.15, 258.15, 238.15 and 218.15 K                                                                                                                                                                                                                   |
| S32     | <b>Table S11</b> Total evaporation coefficients ( $\sum \gamma$ , $\text{s}^{-1}$ ) for each cluster in the present study                                                                                                                                                                                                                                                 |
| S33     | <b>Table S12</b> The generated enhancement strength $R$ of DSA at the conditions of $T = 218.15$ K, $[\text{SA}] = 10^6 - 10^8$ molecules $\cdot\text{cm}^{-3}$ , $[\text{A}] = 10^7 - 10^{11}$ molecules $\cdot\text{cm}^{-3}$ , and $[\text{DSA}] = 10^1 - 10^3$ molecules $\cdot\text{cm}^{-3}$                                                                        |
| S34     | <b>Table S13</b> The generated enhancement strength $R$ of DSA at the conditions of $T = 238.15$ K, $[\text{SA}] = 10^6 - 10^8$ molecules $\cdot\text{cm}^{-3}$ , $[\text{A}] = 10^7 - 10^{11}$ molecules $\cdot\text{cm}^{-3}$ , and $[\text{DSA}] = 10^1 - 10^3$ molecules $\cdot\text{cm}^{-3}$                                                                        |
| S35     | <b>Table S14</b> The generated enhancement strength $R$ of DSA at the conditions of $T = 258.15$ K, $[\text{SA}] = 10^6 - 10^8$ molecules $\cdot\text{cm}^{-3}$ , $[\text{A}] = 10^7 - 10^{11}$ molecules $\cdot\text{cm}^{-3}$ , and $[\text{DSA}] = 10^1 - 10^3$ molecules $\cdot\text{cm}^{-3}$                                                                        |
| S36     | <b>Table S15</b> The generated enhancement strength $R$ of DSA at the conditions of $T = 278.15$ K, $[\text{SA}] = 10^6 - 10^8$ molecules $\cdot\text{cm}^{-3}$ , $[\text{A}] = 10^7 - 10^{11}$ molecules $\cdot\text{cm}^{-3}$ , and $[\text{DSA}] = 10^1 - 10^3$ molecules $\cdot\text{cm}^{-3}$                                                                        |
| S37     | <b>Table S16</b> The generated enhancement strength $R$ of DSA at the conditions of $T = 298.15$ K, $[\text{SA}] = 10^6 - 10^8$ molecules $\cdot\text{cm}^{-3}$ , $[\text{A}] = 10^7 - 10^{11}$ molecules $\cdot\text{cm}^{-3}$ , and $[\text{DSA}] = 10^1 - 10^3$ molecules $\cdot\text{cm}^{-3}$                                                                        |
| S38     | <b>Fig. S11</b> The logarithms of the formation rate of DSA ( $\lg J$ ) as a function of $[\text{DSA}]$ from $10^0$ to $10^3$ molecules $\cdot\text{cm}^{-3}$ under different temperatures (218.15, 238.15, 258.15, 278.15 and 298.15 K) where $[\text{SA}] = 10^7$ molecules $\cdot\text{cm}^{-3}$ and $[\text{A}] = 10^9$ molecules $\cdot\text{cm}^{-3}$               |
| S39     | <b>Fig. S12</b> The logarithms of the enhancement strength of DSA ( $\lg R$ ) as a function of $[\text{A}]$ from $10^7$ to $10^{11}$ molecules $\text{cm}^{-3}$ and $[\text{DSA}] = 10^3$ molecules $\cdot\text{cm}^{-3}$ under different $[\text{SA}] = 10^6 \sim 10^8$ molecules $\cdot\text{cm}^{-3}$ $T =$ (a) 218.15 K, (b) 238.15 K, (c) 258.15 K, and (d) 298.15 K |
| S40     | <b>Fig. S13</b> The main pathways of clusters growing out of the research system under the conditions where $T = 298.15$ K, $[\text{SA}] = 10^7$ molecules $\cdot\text{cm}^{-3}$ , $[\text{A}] = 10^{11}$ molecules $\cdot\text{cm}^{-3}$ , and $[\text{DSA}] = 10^3$ molecules $\cdot\text{cm}^{-3}$                                                                     |
| S41-S60 | <b>Table S17</b> Cartesian coordinates of all molecules and clusters in the studied system                                                                                                                                                                                                                                                                                |

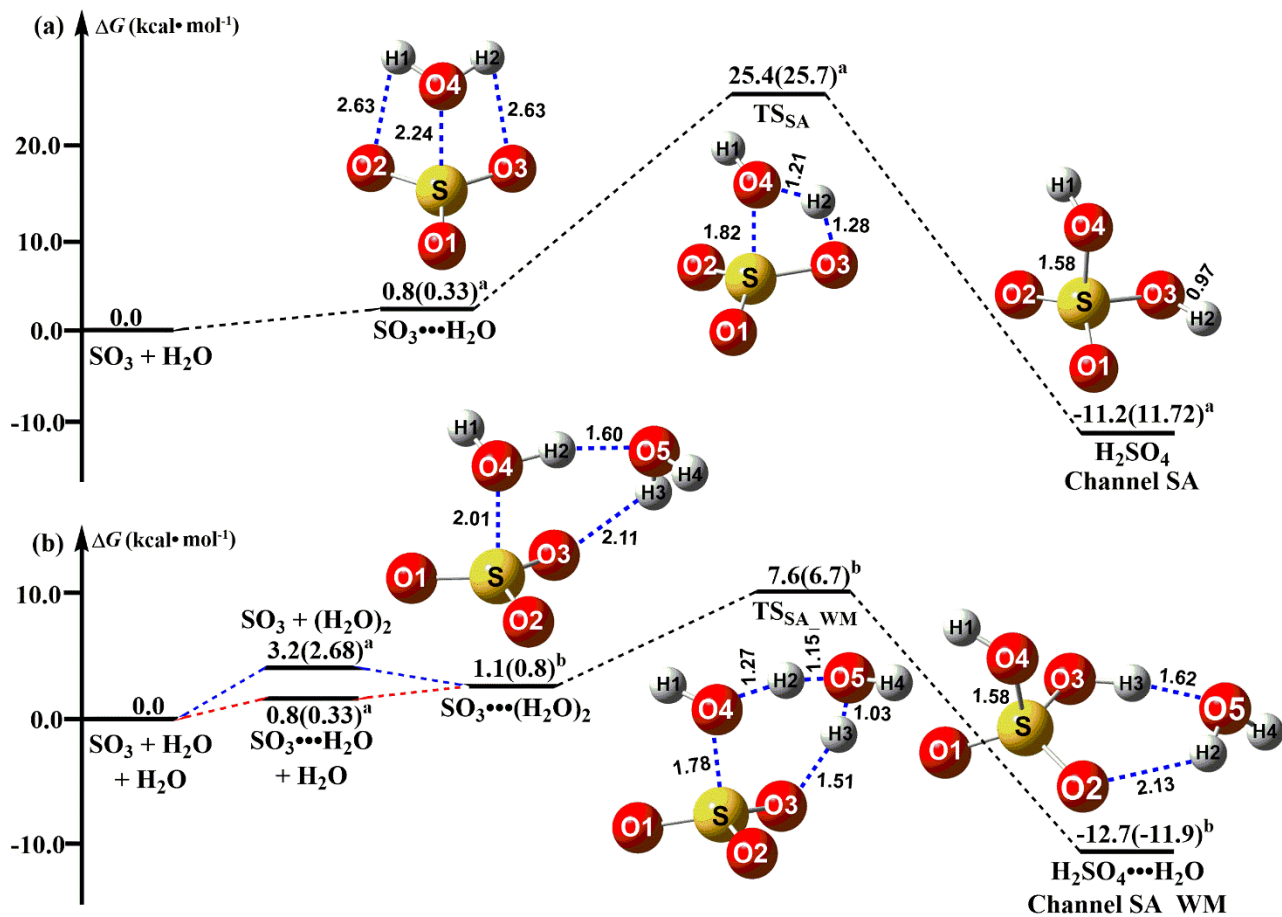

**Fig. S1** Schematic energy diagrams for the formation of H<sub>2</sub>SO<sub>4</sub> from the SO<sub>3</sub> + H<sub>2</sub>O reaction without and with H<sub>2</sub>O at the CCSD(T)-F12/cc-pVDZ-F12//M06-2X/6-311++G(2df,2pd) level of theory

<sup>a</sup> The value was taken from reference (*Chem. Phys. Lett.*, 2013, 581, 26-29.)

<sup>b</sup> The value was taken from reference (*J. Phys. Chem. A*, 2021, 123, 3131–3141.)

**Table S1** Relative energies ( $\Delta E$  and  $\Delta(E + ZPE)$ /(kcal·mol<sup>-1</sup>)), enthalpies ( $\Delta H$ /(kcal·mol<sup>-1</sup>)), entropy (S(298 K)/(cal·mol<sup>-1</sup>·K<sup>-1</sup>)) and free energies ( $\Delta G$ (298 K)/(kcal·mol<sup>-1</sup>)) for the reactants, intermediates, transition states and products involved in the reaction of SO<sub>3</sub> + H<sub>2</sub>SO<sub>4</sub> without and with H<sub>2</sub>O along with the hydrolysis reaction of SO<sub>3</sub> without and with H<sub>2</sub>O

| <i>Species</i>                                                        | ZPE  | $\Delta E$ | S     | $\Delta G$                                    | $\Delta(E+ZPE)$ | $\Delta H$ |
|-----------------------------------------------------------------------|------|------------|-------|-----------------------------------------------|-----------------|------------|
| SO <sub>3</sub> + H <sub>2</sub> SO <sub>4</sub>                      | 33.1 | 0.0        | 133.5 | 0.0                                           | 0.0             | 0.0        |
| SO <sub>3</sub> ···H <sub>2</sub> SO <sub>4</sub>                     | 34.6 | -14.3      | 93.8  | -1.6                                          | -12.9           | -13.4      |
| TS <sub>DSA</sub>                                                     | 32.9 | -11.6      | 87.1  | 0.7                                           | -11.9           | -13.1      |
| H <sub>2</sub> S <sub>2</sub> O <sub>7</sub>                          | 35.4 | -21.6      | 89.5  | -7.0                                          | -19.4           | -20.2      |
| SO <sub>3</sub> + H <sub>2</sub> SO <sub>4</sub> + H <sub>2</sub> O   | 46.7 | 0.0        | 178.6 | 0.0                                           | 0.0             | 0.0        |
| SO <sub>3</sub> ···H <sub>2</sub> O + H <sub>2</sub> SO <sub>4</sub>  | 24.0 | -9.4       | 77.9  | 0.8                                           | -7.0            | -7.6       |
| H <sub>2</sub> SO <sub>4</sub> ···H <sub>2</sub> O + SO <sub>3</sub>  | 40.9 | -12.4      | 87.0  | -1.9(-1.82) <sup>a</sup>                      | -10.2           | -10.9      |
| IM <sub>DSA_WM'</sub>                                                 | 49.3 | -18.0      | 119.4 | 2.1                                           | -15.4           | -15.6      |
| TS <sub>DSA_WM'</sub>                                                 | 49.2 | -18.0      | 112.8 | 3.3                                           | -15.6           | -16.3      |
| SO <sub>3</sub> ···H <sub>2</sub> SO <sub>4</sub> ···H <sub>2</sub> O | 49.8 | -27.8      | 104.5 | -4.0                                          | -24.7           | -26.1      |
| TS <sub>DSA_WM</sub>                                                  | 49.3 | -27.5      | 99.9  | -3.5                                          | -24.9           | -26.9      |
| H <sub>2</sub> S <sub>2</sub> O <sub>7</sub> ···H <sub>2</sub> O      | 50.7 | -34.6      | 102.8 | -9.5                                          | -30.6           | -32.1      |
| SO <sub>3</sub> + H <sub>2</sub> O                                    | 21.6 | 0.0        | 106.2 | 0.0                                           | 0.0             | 0.0        |
| SO <sub>3</sub> ···H <sub>2</sub> O                                   | 24.0 | -9.4       | 77.9  | 0.8(0.33) <sup>b</sup><br>(0.62) <sup>c</sup> | -7.0            | -7.6       |
| TS <sub>SA</sub>                                                      | 22.3 | 15.7       | 70.4  | 25.4(25.7) <sup>b</sup>                       | 16.4            | 14.7       |
| H <sub>2</sub> SO <sub>4</sub>                                        | 25.2 | -23.6      | 71.8  | -11.2(-10.72) <sup>b</sup>                    | -20.0           | -21.4      |
| SO <sub>3</sub> + H <sub>2</sub> O + H <sub>2</sub> O                 | 35.2 | 0.0        | 151.3 | 0.0                                           | 0.0             | 0.0        |
| SO <sub>3</sub> ···H <sub>2</sub> O + H <sub>2</sub> O                | 24.0 | -9.4       | 77.9  | 0.8(0.33) <sup>b</sup><br>(0.62) <sup>c</sup> | -7.0            | -7.6       |
| SO <sub>3</sub> + (H <sub>2</sub> O) <sub>2</sub>                     | 29.5 | -5.0       | 68.6  | 3.2(2.68) <sup>b</sup>                        | -2.7            | -3.3       |
| SO <sub>3</sub> ···(H <sub>2</sub> O) <sub>2</sub>                    | 40.7 | -21.6      | 87.4  | 1.1(0.8) <sup>d</sup>                         | -16.0           | -17.9      |
| TS <sub>SA_WM</sub>                                                   | 39.1 | -14.5      | 80.1  | 7.6(6.7) <sup>d</sup>                         | -10.6           | -13.6      |
| H <sub>2</sub> SO <sub>4</sub> ···H <sub>2</sub> O                    | 41.0 | -36.0      | 85.5  | -12.7(-11.9) <sup>d</sup>                     | -30.2           | -32.3      |

<sup>a</sup> The value was taken from reference (Long, B., Tan, X. F., Chang, C. R., Zhao, W. X., Long, Z. W., Ren, D. S., and Zhang, W. J.: Theoretical studies on gas-phase reactions of sulfuric acid catalyzed hydrolysis of formaldehyde and formaldehyde with sulfuric acid and H<sub>2</sub>SO<sub>4</sub>···H<sub>2</sub>O complex, J. Phys. Chem. A 117, 5106-5116, 2013.)

<sup>b</sup> The value was taken from reference (Long, B., Chang, C. R., Long, Z. W., Wang, Y. B., Tan, X. F., and Zhang, W. J.: Nitric acid catalyzed hydrolysis of SO<sub>3</sub> in the formation of sulfuric acid: A theoretical study, Chem. Phys. Lett., 581, 26-29, 2013.)

<sup>c</sup> The value was taken from reference (Long, B., Long, Z. W., Wang, Y. B., Tan, X. F., Han, Y. W., Long, C. W., Qin, S. J., and Zhang, W. J.: Formic acid catalyzed gas-phase reaction of H<sub>2</sub>O with SO<sub>3</sub> and the reverse reaction: A theoretical study, ChemPhysChem, 13, 323-329, 10.1002/cphc.201100558, 2012.)

<sup>d</sup> The value was taken from reference (Sarkar, S., Oram, B. K., and Bandyopadhyay, B.: Influence of ammonia and water on the fate of sulfur trioxide in the troposphere: theoretical investigation of sulfamic acid and sulfuric acid formation pathways, J. Phys. Chem. A, 123, 3131-3141, 2019.)

**Table S2** Equilibrium constants ( $\text{cm}^3 \cdot \text{molecule}^{-1}$ ) for  $\text{SO}_3 \cdots \text{H}_2\text{SO}_4$ ,  $\text{SO}_3 \cdots \text{H}_2\text{O}$ ,  $\text{H}_2\text{SO}_4 \cdots \text{H}_2\text{O}$  and  $(\text{H}_2\text{O})_2$  within the temperature range of 280-320 K

| $T/\text{K}$ | $\text{SO}_3 \cdots \text{H}_2\text{SO}_4$ | $\text{SO}_3 \cdots \text{H}_2\text{O}$        | $\text{H}_2\text{SO}_4 \cdots \text{H}_2\text{O}$ | $(\text{H}_2\text{O})_2$                       |
|--------------|--------------------------------------------|------------------------------------------------|---------------------------------------------------|------------------------------------------------|
| 280          | $2.54 \times 10^{-18}$                     | $2.45 \times 10^{-20}$                         | $3.00 \times 10^{-118}$                           | $2.86 \times 10^{-22}$                         |
| 290          | $1.15 \times 10^{-18}$                     | $1.59 \times 10^{-20}$                         | $2.66 \times 10^{-19}$                            | $2.42 \times 10^{-22}$                         |
| 298          | $6.33 \times 10^{-19}$                     | $1.14 \times 10^{-20}(6.44 \times 10^{-20})^a$ | $1.67 \times 10^{-19}(5.16 \times 10^{-20})^b$    | $2.14 \times 10^{-22}(2.34 \times 10^{-21})^c$ |
| 300          | $5.48 \times 10^{-19}$                     | $1.06 \times 10^{-20}$                         | $1.49 \times 10^{-19}$                            | $2.08 \times 10^{-22}$                         |
| 310          | $2.75 \times 10^{-19}$                     | $7.25 \times 10^{-21}$                         | $8.68 \times 10^{-20}$                            | $1.80 \times 10^{-22}$                         |
| 320          | $1.44 \times 10^{-20}$                     | $5.10 \times 10^{-21}$                         | $5.24 \times 10^{-20}$                            | $1.58 \times 10^{-22}$                         |

<sup>a</sup> The value was taken from reference (Long, B., Long, Z. W., Wang, Y. B., Tan, X. F., Han, Y. W., Long, C. W., Qin, S. J., and Zhang, W. J.: Formic Acid Catalyzed Gas-Phase Reaction of  $\text{H}_2\text{O}$  with  $\text{SO}_3$  and the Reverse Reaction: A Theoretical Study, *ChemPhysChem*, 13, 323-329, 10.1002/cphc.201100558, 2012.)

<sup>b</sup> The value was taken from reference (Wang, R., Wen, M., Chen, X., Mu, R., Zeng, Z., Chai, G., Lily, M., Wang, Z., and Zhang, T.: Atmospheric Chemistry of  $\text{CH}_2\text{OO}$ : The Hydrolysis of  $\text{CH}_2\text{OO}$  in Small Clusters of Sulfuric Acid, *J. Phys. Chem. A*, 125, 2642-2652, 10.1021/acs.jpca.1c02006, 2021.)

<sup>c</sup> The value was taken from reference (Torrent-Sucarrat, M., Francisco, J. S., and Anglada, J. M.: Sulfuric acid as autocatalyst in the formation of sulfuric acid, *J. Am. Chem. Soc.*, 134, 20632-20644, 2012.)

**Table S3** Concentrations (molecules·cm<sup>-3</sup>) of H<sub>2</sub>O and H<sub>2</sub>SO<sub>4</sub> within the temperature range of 280-320 K

| Catalysts                                          | RH                                  | 280 K                 | 290 K                 | 298 K                                                                                            | 300 K                 | 310 K                 | 320 K                 |
|----------------------------------------------------|-------------------------------------|-----------------------|-----------------------|--------------------------------------------------------------------------------------------------|-----------------------|-----------------------|-----------------------|
| H <sub>2</sub> O                                   | 20%RH <sup>a</sup>                  | $5.16 \times 10^{16}$ | $9.60 \times 10^{16}$ | $1.50 \times 10^{17}$                                                                            | $1.72 \times 10^{17}$ | $2.92 \times 10^{17}$ | $4.70 \times 10^{17}$ |
|                                                    | 40%RH <sup>a</sup>                  | $1.03 \times 10^{17}$ | $1.91 \times 10^{17}$ | $3.10 \times 10^{17}$                                                                            | $3.43 \times 10^{17}$ | $5.84 \times 10^{17}$ | $9.40 \times 10^{17}$ |
|                                                    | 60%RH <sup>a</sup>                  | $1.55 \times 10^{17}$ | $2.87 \times 10^{17}$ | $4.50 \times 10^{17}$                                                                            | $5.15 \times 10^{17}$ | $8.77 \times 10^{17}$ | $1.41 \times 10^{18}$ |
|                                                    | 80%RH <sup>a</sup>                  | $2.07 \times 10^{17}$ | $3.82 \times 10^{17}$ | $6.20 \times 10^{17}$                                                                            | $6.86 \times 10^{17}$ | $1.17 \times 10^{18}$ | $1.88 \times 10^{18}$ |
|                                                    | 100%RH <sup>a</sup>                 | $2.58 \times 10^{17}$ | $4.78 \times 10^{17}$ | $7.70 \times 10^{17}$                                                                            | $8.58 \times 10^{17}$ | $1.46 \times 10^{18}$ | $2.35 \times 10^{18}$ |
| H <sub>2</sub> SO <sub>4</sub>                     | [SA] <sup>b</sup> = 10 <sup>6</sup> | $3.90 \times 10^6$    | $3.80 \times 10^6$    | $3.70 \times 10^6$                                                                               | $3.60 \times 10^6$    | $3.50 \times 10^6$    | $3.40 \times 10^6$    |
|                                                    | [SA] <sup>c</sup> = 10 <sup>7</sup> | $5.00 \times 10^7$    | $5.00 \times 10^7$    | $5.00 \times 10^7$                                                                               | $5.00 \times 10^7$    | $5.00 \times 10^7$    | $5.00 \times 10^7$    |
|                                                    | [SA] <sup>b</sup> = 10 <sup>8</sup> | $3.90 \times 10^8$    | $3.80 \times 10^8$    | $3.70 \times 10^8$                                                                               | $3.60 \times 10^8$    | $3.50 \times 10^8$    | $3.40 \times 10^8$    |
| H <sub>2</sub> SO <sub>4</sub> ···H <sub>2</sub> O | 20%RH                               | $6.03 \times 10^5$    | $5.76 \times 10^5$    | $5.42 \times 10^5$                                                                               | $5.39 \times 10^5$    | $5.10 \times 10^5$    | $5.10 \times 10^5$    |
|                                                    | 40%RH                               | $1.20 \times 10^6$    | $1.15 \times 10^6$    | $1.12 \times 10^6$                                                                               | $1.07 \times 10^6$    | $1.02 \times 10^6$    | $1.02 \times 10^6$    |
|                                                    | [SA] <sup>e</sup> = 10 <sup>6</sup> | 60%RH                 | $1.81 \times 10^6$    | $1.72 \times 10^6$                                                                               | $1.63 \times 10^6$    | $1.61 \times 10^6$    | $1.53 \times 10^6$    |
|                                                    | 80%RH                               | $2.42 \times 10^6$    | $2.29 \times 10^6$    | $2.24 \times 10^6$                                                                               | $2.15 \times 10^6$    | $2.04 \times 10^6$    | $2.04 \times 10^6$    |
|                                                    | 100%RH                              | $3.01 \times 10^6$    | $2.87 \times 10^6$    | $2.78 \times 10^6$                                                                               | $2.69 \times 10^6$    | $2.55 \times 10^6$    | $2.55 \times 10^6$    |
|                                                    | 20%RH                               | $7.73 \times 10^6$    | $7.58 \times 10^6$    | $7.33 \times 10^6$                                                                               | $7.48 \times 10^6$    | $7.29 \times 10^6$    | $7.29 \times 10^6$    |
|                                                    | 40%RH                               | $1.54 \times 10^7$    | $1.51 \times 10^7$    | $1.51 \times 10^7$                                                                               | $1.49 \times 10^7$    | $1.46 \times 10^7$    | $1.46 \times 10^7$    |
|                                                    | [SA] <sup>c</sup> = 10 <sup>7</sup> | 60%RH                 | $2.32 \times 10^7$    | $2.27 \times 10^7$                                                                               | $2.20 \times 10^7$    | $2.24 \times 10^7$    | $2.19 \times 10^7$    |
|                                                    | 80%RH                               | $3.10 \times 10^7$    | $3.02 \times 10^7$    | $3.03 \times 10^7$                                                                               | $2.98 \times 10^7$    | $2.92 \times 10^7$    | $2.92 \times 10^7$    |
|                                                    | 100%RH                              | $3.86 \times 10^7$    | $3.77 \times 10^7$    | $3.76 \times 10^7$                                                                               | $3.73 \times 10^7$    | $3.64 \times 10^7$    | $3.64 \times 10^7$    |
|                                                    | 20%RH                               | $6.03 \times 10^7$    | $5.76 \times 10^7$    | $5.42 \times 10^7$                                                                               | $5.39 \times 10^7$    | $5.10 \times 10^7$    | $5.10 \times 10^7$    |
|                                                    | 40%RH                               | $1.20 \times 10^8$    | $1.15 \times 10^8$    | $1.12 \times 10^8$                                                                               | $1.07 \times 10^8$    | $1.02 \times 10^8$    | $1.02 \times 10^8$    |
|                                                    | [SA] <sup>e</sup> = 10 <sup>8</sup> | 60%RH                 | $1.81 \times 10^8$    | $1.72 \times 10^8$                                                                               | $1.63 \times 10^8$    | $1.61 \times 10^8$    | $1.53 \times 10^8$    |
|                                                    | 80%RH                               | $2.42 \times 10^8$    | $2.29 \times 10^8$    | $2.24 \times 10^8$                                                                               | $2.15 \times 10^8$    | $2.04 \times 10^8$    | $2.04 \times 10^8$    |
|                                                    | 100%RH                              | $3.01 \times 10^8$    | $2.87 \times 10^8$    | $2.78 \times 10^8$<br>( $2.40 \times 10^7$ ) <sup>c</sup><br>( $1.11 \times 10^8$ ) <sup>d</sup> | $2.69 \times 10^8$    | $2.55 \times 10^8$    | $2.55 \times 10^8$    |

<sup>a</sup> The values were reported from reference (Anglada, J. M., Hoffman, G. J., Slipchenko, L. V., M. Costa, M., Ruiz-Lopez, M. F., and Francisco, J. S.: Atmospheric significance of water clusters and ozone-water complexes, *J. Phys. Chem. A*, 117, 10381-10396, 2013.)

<sup>b</sup> The values were taken from reference (Liu, J., Fang, S., Wang, Z., Yi, W., Tao, F. M., and Liu, J. Y.: Hydrolysis of sulfur dioxide in small clusters of sulfuric acid: Mechanistic and kinetic study, *Environ. Sci. Technol.*, 49, 13112-13120, 2015.)

<sup>c</sup> The values were taken from reference (Liu, L., Zhong, J., Vehkamäki, H., Kurtén, T., Du, L., Zhang, X., Francisco, J. S., and Zeng, X. C.: Unexpected quenching effect on new particle formation from the atmospheric reaction of methanol with SO<sub>3</sub>, *Proc. Natl. Acad. Sci. U.S.A.*, 116, 24966-24971, 2019.)

<sup>d</sup> The values were taken from reference (Wang, R., Wen, M., Chen, X., Mu, R., Zeng, Z., Chai, G., Lily, M., Wang, Z., and Zhang, T.: Atmospheric Chemistry of CH<sub>2</sub>OO: The Hydrolysis of CH<sub>2</sub>OO in Small Clusters of Sulfuric Acid, *J. Phys. Chem. A*, 125, 2642-2652, 10.1021/acs.jpca.1c02006, 2021.)

### Part 1 The calculation details of high-pressure-limit (HPL) rate constants

The VRC-VTST calculations were carried out with the potential surface obtained by using CCSD(T)-F12/cc-pVDZ-F12//M06-2X/6-311++G(2df,2pd) and were performed by variationally minimizing the rate constant with respect to the distance  $s$  between pivot points and with respect to the location of the pivot points. Specifically, using two pivot points produces a single-faceted dividing surface for the  $\text{SO}_3 + \text{H}_2\text{SO}_4$  reaction without and with  $\text{H}_2\text{O}$ . Such as, using two pivot points produces a single-faceted dividing surface for the reaction of  $\text{SO}_3 + \text{H}_2\text{SO}_4$ . One pivot point is located at a distance  $d$  from the center of mass (COM) of  $\text{SO}_3$ , where the vector connecting the pivot point with  $\text{SO}_3$ 's COM is perpendicular to the  $\text{SO}_3$  plane, and the other pivot point is located at a distance  $d$  from the COM of catalyst  $\text{H}_2\text{SO}_4$ , where the vector connecting the pivot point with catalyst  $\text{H}_2\text{SO}_4$ 's COM is perpendicular to catalyst  $\text{H}_2\text{SO}_4$  plane. The lengths of these vectors are fixed successively at 0.2 Å. The reaction coordinate  $s$  is the distance between a pivot point on one reactant and a pivot point on the other reactant. The distance  $s$  between pivot points is varied from 2.5 to 8.0 Å for  $\text{SO}_3 + \text{H}_2\text{SO}_4$  in each case with a 0.2 Å grid increment. The details of the VRC-VTST calculations can be seen in the supporting information of reference ([Bao et al., 2016](#)).

### Reference

Bao, J. L.; Zhang, X.; Truhlar, D. G.: Barrierless association of  $\text{CF}_2$  and dissociation of  $\text{C}_2\text{F}_4$  by variational transition-state theory and system-specific quantum Rice-Ramsperger-Kassel theory, Proc. Natl. Acad. Sci. U. S. A., 113, 13606-13611, 2016



**Table S4** The high-pressure limiting rate constants ( $\text{cm}^3 \cdot \text{molecule}^{-1} \cdot \text{s}^{-1}$ ) for the reactants to pre-reactive complex process in the  $\text{SO}_3 + \text{H}_2\text{SO}_4$  reaction without and with  $\text{H}_2\text{O}$ , and the hydrolysis of  $\text{SO}_3$  without and with  $\text{H}_2\text{O}$  calculated by the master equation within the temperature range of 280-320 K

| $T(\text{K})$ | $\text{SO}_3 + \text{H}_2\text{SO}_4 \rightarrow$<br>$\text{SO}_3 \cdots \text{H}_2\text{SO}_4$ | $\text{SO}_3 + \text{H}_2\text{SO}_4 \cdots \text{H}_2\text{O} \rightarrow$<br>$\text{IM}_{\text{DSA\_WM\_a}}'$    | $\text{SO}_3 \cdots \text{H}_2\text{O} + \text{H}_2\text{SO}_4 \rightarrow$<br>$\text{SO}_3 \cdots \text{H}_2\text{SO}_4 \cdots \text{H}_2\text{O}$ |
|---------------|-------------------------------------------------------------------------------------------------|--------------------------------------------------------------------------------------------------------------------|-----------------------------------------------------------------------------------------------------------------------------------------------------|
| 280           | $9.75 \times 10^{-11}$                                                                          | $1.69 \times 10^{-10}$                                                                                             | $7.23 \times 10^{-11}$                                                                                                                              |
| 290           | $9.93 \times 10^{-11}$                                                                          | $1.72 \times 10^{-10}$                                                                                             | $7.35 \times 10^{-11}$                                                                                                                              |
| 298           | $1.01 \times 10^{-10}$                                                                          | $1.75 \times 10^{-10}$                                                                                             | $7.46 \times 10^{-11}$                                                                                                                              |
| 300           | $1.01 \times 10^{-10}$                                                                          | $1.75 \times 10^{-10}$                                                                                             | $7.48 \times 10^{-11}$                                                                                                                              |
| 310           | $1.03 \times 10^{-10}$                                                                          | $1.78 \times 10^{-10}$                                                                                             | $7.60 \times 10^{-11}$                                                                                                                              |
| 320           | $1.04 \times 10^{-10}$                                                                          | $1.81 \times 10^{-10}$                                                                                             | $7.73 \times 10^{-11}$                                                                                                                              |
| $T(\text{K})$ | $\text{SO}_3 + \text{H}_2\text{O} \rightarrow \text{SO}_3 \cdots \text{H}_2\text{O}$            | $\text{SO}_3 \cdots \text{H}_2\text{O} + \text{H}_2\text{O} \rightarrow \text{SO}_3 \cdots (\text{H}_2\text{O})_2$ |                                                                                                                                                     |
| 280           | $1.45 \times 10^{-10}$                                                                          | $2.24 \times 10^{-10}$                                                                                             |                                                                                                                                                     |
| 290           | $1.47 \times 10^{-10}$                                                                          | $2.28 \times 10^{-10}$                                                                                             |                                                                                                                                                     |
| 298           | $1.49 \times 10^{-10}$                                                                          | $2.32 \times 10^{-10}$                                                                                             |                                                                                                                                                     |
| 300           | $1.50 \times 10^{-10}$                                                                          | $2.32 \times 10^{-10}$                                                                                             |                                                                                                                                                     |
| 310           | $1.52 \times 10^{-10}$                                                                          | $2.36 \times 10^{-10}$                                                                                             |                                                                                                                                                     |
| 320           | $1.55 \times 10^{-10}$                                                                          | $2.40 \times 10^{-10}$                                                                                             |                                                                                                                                                     |

## Part 2 The details of Master Equation Solver for Multi-Energy Well Reactions

The rate constants for the  $\text{SO}_3 + \text{H}_2\text{SO}_4$  reaction without and with  $\text{H}_2\text{O}$  within the temperature range of 280-320 K were calculated by using the Master Equation Solver for Multi-Energy Well Reactions (MESMER) (Miller and Klippenstein, 2006). Specifically, as for the  $\text{SO}_3 + \text{H}_2\text{SO}_4$  reaction without and with  $\text{H}_2\text{O}$ , the barrierless bimolecular reaction steps were evaluated by using Inverse Laplace Transform (ILT) method (Horváth et al., 2020), whereas the rate determining steps were obtained by employing the RRKM theory. The ILT methods and RRKM theory can be respectively expressed in Eq. (S1)-Eq. (S2).

$$k(E) = \frac{W(E - E_0)}{h\rho(E)} \quad (\text{S1})$$

$$k^\infty(\beta) = \frac{1}{Q(\beta)} \int_0^\infty k(E)\rho(E)\exp(-\beta E)dE \quad (\text{S2})$$

In Eq. (S1) and Eq. (S2),  $W(E-E_0)$  is the rovibrational sum of states (SOS) at the optimized transition state (TS) geometry,  $E_0$  is the reaction threshold energy,  $h$  is Planck's constant,  $\rho(E)$  is the density of rovibrational states of the reactant, and  $Q(\beta)$  is the corresponding canonical partition function. Moreover, the electronic geometries, vibrational frequencies, and rotational constants were calculated at the M06-2X/6-311+G(2df,2pd) level; single-point energy calculations were refined at the CCSD(T)-F12/cc-pVDZ-F12 level for the modeling. The one-dimensional asymmetric Eckart potential was used to treat the tunneling effect in the RRKM calculation. In addition, the Lennard-Jones (L-J) parameters  $\varepsilon/k_B = 71.4$  K and  $\sigma = 3.798$  Å were used for  $\text{N}_2$ , while  $\varepsilon/k_B = 420.08$  K and  $\sigma = 2.89$  Å were estimated for  $\text{H}_2\text{SO}_4$  and its isomer.

## Reference

- Horváth, G., Horváth, I., Almousa, S. A. D., and Telek, M.: Numerical inverse Laplace transformation using concentrated matrix exponential distributions, Perform. Evaluation, 137, 102067, 2020.
- Miller, J. A., and Klippenstein, S. J.: Master equation methods in gas phase chemical kinetics, J. Phys. Chem. A, 110, 10528-10544, 2006.

**Table S5** Rate constants ( $\text{cm}^3 \cdot \text{molecule}^{-1} \cdot \text{s}^{-1}$ ) for the  $\text{SO}_3 + \text{H}_2\text{SO}_4$  reaction with  $\text{H}_2\text{O}$  and the hydrolysis of  $\text{SO}_3$  without and with  $\text{H}_2\text{O}$  within the temperature range of 280-320 K

| Channel          | T/K                    | 280                                                              | 290                                                              | 298                                                               | 300                                                              | 310                                                              | 320                                                              |
|------------------|------------------------|------------------------------------------------------------------|------------------------------------------------------------------|-------------------------------------------------------------------|------------------------------------------------------------------|------------------------------------------------------------------|------------------------------------------------------------------|
| Channel          | $k_{\text{DSA\_WM}_o}$ | $3.35 \times 10^{-11}$                                           | $3.53 \times 10^{-11}$                                           | $3.27 \times 10^{-11}$                                            | $3.19 \times 10^{-11}$                                           | $2.73 \times 10^{-11}$                                           | $2.29 \times 10^{-11}$                                           |
| DSA_WM           | $k_{\text{DSA\_WM}_s}$ | $1.33 \times 10^{-11}$                                           | $1.13 \times 10^{-11}$                                           | $9.87 \times 10^{-12}$                                            | $9.53 \times 10^{-12}$                                           | $7.95 \times 10^{-12}$                                           | $6.59 \times 10^{-12}$                                           |
| Channel SA       | $k_{\text{SA}}$        | $6.22 \times 10^{-24}$<br>( $8.0 \times 10^{-24}$ ) <sup>a</sup> | $8.07 \times 10^{-24}$<br>( $1.1 \times 10^{-23}$ ) <sup>a</sup> | $1.02 \times 10^{-23}$<br>( $1.4 \times 10^{-23}$ ) <sup>a</sup>  | $1.08 \times 10^{-23}$<br>( $1.4 \times 10^{-23}$ ) <sup>a</sup> | $1.49 \times 10^{-23}$<br>( $2.0 \times 10^{-23}$ ) <sup>a</sup> | $2.11 \times 10^{-23}$<br>( $3.0 \times 10^{-23}$ ) <sup>a</sup> |
| Channel<br>SA_WM | $k_{\text{SA\_WM}}$    | $1.37 \times 10^{-12}$                                           | $1.17 \times 10^{-12}$                                           | $1.04 \times 10^{-12}$<br>( $4.08 \times 10^{-12}$ ) <sup>a</sup> | $1.01 \times 10^{-12}$                                           | $8.67 \times 10^{-13}$                                           | $7.49 \times 10^{-13}$                                           |

$k_{\text{DSA\_WM}_o}$  and  $k_{\text{DSA\_WM}_s}$  are respectively the rate constants for the formation of  $\text{H}_2\text{S}_2\text{O}_7$  from the reaction of  $\text{SO}_3 + \text{H}_2\text{SO}_4$  with  $\text{H}_2\text{O}$  occurring through one-step and stepwise routes;  $k_{\text{SA}}$  and  $k_{\text{SA\_WM}}$  are respectively the rate constants for the formation of  $\text{H}_2\text{SO}_4$  without and with  $\text{H}_2\text{O}$ .

<sup>a</sup> The value was taken from reference (Bandyopadhyay, B., Kumar, P., and Biswas, P.: Ammonia Catalyzed Formation of Sulfuric Acid in Troposphere: The Curious Case of a Base Promoting Acid Rain, J. Phys. Chem. A, 121, 3101-3108, 10.1021/acs.jpca.7b01172, 2017.)

<sup>b</sup> The value was taken from reference (Torrent-Sucarrat, M., Francisco, J. S., and Anglada, J. M.: Sulfuric acid as autocatalyst in the formation of sulfuric acid, J. Am. Chem. Soc., 134, 20632-20644, 2012.)

### Part 3 Calculations of effective rate constants

Usually, the effective rate constants ( $k'$ ) is considered to be the relative efficiency of many atmospheric reactions (Liu et al., 2019; Sun et al., 2016; Ali et al., 2018; Ali et al., 2019) with water vapor. To better understand the competition between  $\text{H}_2\text{S}_2\text{O}_7$  and  $\text{H}_2\text{SO}_4$  formation in the atmospheric environment, it is necessary to compare the effective rate constants in different reaction. For the  $\text{H}_2\text{S}_2\text{O}_7$  formation, the  $k'$  for the  $\text{H}_2\text{O}$ -assisted reaction (Channels DSA\_WM) can be respectively expressed as:

$$k'_{\text{DSA\_WM\_o}} = k_{\text{DSA\_WM\_o}} \times K_{\text{eq1}} \times [\text{H}_2\text{O}] \quad (\text{S3})$$

$$k'_{\text{DSA\_WM\_s}} = k_{\text{DSA\_WM\_s}} \times K_{\text{eq2}} \times [\text{H}_2\text{O}] \quad (\text{S4})$$

In above formula,  $k_{\text{DSA\_WM\_o}}$  and  $k_{\text{DSA\_WM\_s}}$  were respectively denoted the bimolecular rate coefficient for Channels DSA\_WM\_o, DSA\_WM\_s and SA\_WM;  $[\text{H}_2\text{O}]$  and  $[\text{H}_2\text{SO}_4]$  were respectively represented the concentration of  $\text{H}_2\text{O}$  and  $\text{H}_2\text{SO}_4$  listed in Table S3;  $K_{\text{eq1}}$  and  $K_{\text{eq2}}$  is the equilibrium constant for the formation of complex  $\text{SO}_3 \cdots \text{H}_2\text{O}$  and  $\text{H}_2\text{SO}_4 \cdots \text{H}_2\text{O}$  shown in Table S2.

### Reference

- Ali, M. A., Balaganesh, M., and Lin, K.: Catalytic effect of a single water molecule on the  $\text{OH} + \text{CH}_2\text{NH}$  reaction, *Phys. Chem. Chem. Phys.*, 20, 4297-4307, 2018.
- Ali, M. A., M, B., and Jang, S.: Can a single water molecule catalyze the  $\text{OH} + \text{CH}_2\text{CH}_2$  and  $\text{OH} + \text{CH}_2\text{O}$  reactions? *Atmos. Environ.*, 207, 82-92, <https://doi.org/10.1016/j.atmosenv.2019.03.025>, 2019.
- Liu, L., Zhong, J., Vehkamäki, H., Kurtén, T., Du, L., Zhang, X., Francisco, J. S., and Zeng, X. C.: Unexpected quenching effect on new particle formation from the atmospheric reaction of methanol with  $\text{SO}_3$ , *Proc. Natl. Acad. Sci. U.S.A.*, 116, 24966-24971, 2019.
- Sun, Y. Q., Wang, X., Bai, F.-Y., and Pan, X. M.: Theoretical study of the hydrolysis of  $\text{HOSO} + \text{NO}_2$  as a source of atmospheric HONO: effects of  $\text{H}_2\text{O}$  or  $\text{NH}_3$ , *Environ. Chem.*, 14, 19-30, 2016.

**Table S6** The rate ratio between the  $\text{SO}_3 + \text{H}_2\text{SO}_4$  reaction and the hydrolysis of  $\text{SO}_3$  within the temperature range of 280-320 K

| <b>RH</b> | <b>[H<sub>2</sub>SO<sub>4</sub>]</b> | <b>280</b>              | <b>290</b>              | <b>298</b>              | <b>300</b>              | <b>310</b>              | <b>320</b>              |
|-----------|--------------------------------------|-------------------------|-------------------------|-------------------------|-------------------------|-------------------------|-------------------------|
| 20%RH     | 10 <sup>6</sup>                      | 3.30 × 10 <sup>-7</sup> | 1.40 × 10 <sup>-8</sup> | 7.48 × 10 <sup>-8</sup> | 5.98 × 10 <sup>-8</sup> | 2.80 × 10 <sup>-8</sup> | 1.41 × 10 <sup>-9</sup> |
|           | 10 <sup>7</sup>                      | 4.23 × 10 <sup>-6</sup> | 1.84 × 10 <sup>-6</sup> | 1.01 × 10 <sup>-6</sup> | 8.30 × 10 <sup>-7</sup> | 4.00 × 10 <sup>-7</sup> | 2.07 × 10 <sup>-7</sup> |
|           | 10 <sup>8</sup>                      | 3.30 × 10 <sup>-5</sup> | 1.40 × 10 <sup>-5</sup> | 7.48 × 10 <sup>-6</sup> | 5.98 × 10 <sup>-6</sup> | 2.80 × 10 <sup>-6</sup> | 1.41 × 10 <sup>-7</sup> |
| 40%RH     | 10 <sup>6</sup>                      | 1.05 × 10 <sup>-7</sup> | 4.48 × 10 <sup>-8</sup> | 2.25 × 10 <sup>-8</sup> | 1.91 × 10 <sup>-8</sup> | 8.90 × 10 <sup>-9</sup> | 4.45 × 10 <sup>-9</sup> |
|           | 10 <sup>7</sup>                      | 1.35 × 10 <sup>-6</sup> | 5.90 × 10 <sup>-7</sup> | 3.04 × 10 <sup>-7</sup> | 2.65 × 10 <sup>-7</sup> | 1.27 × 10 <sup>-7</sup> | 6.54 × 10 <sup>-8</sup> |
|           | 10 <sup>8</sup>                      | 1.05 × 10 <sup>-5</sup> | 4.48 × 10 <sup>-6</sup> | 2.25 × 10 <sup>-6</sup> | 1.91 × 10 <sup>-6</sup> | 8.90 × 10 <sup>-7</sup> | 4.45 × 10 <sup>-7</sup> |
| 60%RH     | 10 <sup>6</sup>                      | 5.65 × 10 <sup>-8</sup> | 2.41 × 10 <sup>-8</sup> | 1.28 × 10 <sup>-8</sup> | 1.03 × 10 <sup>-8</sup> | 4.79 × 10 <sup>-9</sup> | 2.39 × 10 <sup>-9</sup> |
|           | 10 <sup>7</sup>                      | 7.24 × 10 <sup>-7</sup> | 3.17 × 10 <sup>-7</sup> | 1.72 × 10 <sup>-7</sup> | 1.43 × 10 <sup>-7</sup> | 6.84 × 10 <sup>-8</sup> | 3.51 × 10 <sup>-8</sup> |
|           | 10 <sup>8</sup>                      | 5.65 × 10 <sup>-6</sup> | 2.41 × 10 <sup>-6</sup> | 1.28 × 10 <sup>-6</sup> | 1.03 × 10 <sup>-6</sup> | 4.79 × 10 <sup>-7</sup> | 2.39 × 10 <sup>-7</sup> |
| 80%RH     | 10 <sup>6</sup>                      | 3.73 × 10 <sup>-8</sup> | 1.60 × 10 <sup>-8</sup> | 8.05 × 10 <sup>-9</sup> | 6.82 × 10 <sup>-9</sup> | 3.16 × 10 <sup>-9</sup> | 1.57 × 10 <sup>-9</sup> |
|           | 10 <sup>7</sup>                      | 4.78 × 10 <sup>-7</sup> | 2.10 × 10 <sup>-7</sup> | 1.09 × 10 <sup>-7</sup> | 9.47 × 10 <sup>-8</sup> | 4.52 × 10 <sup>-8</sup> | 2.32 × 10 <sup>-8</sup> |
|           | 10 <sup>8</sup>                      | 3.73 × 10 <sup>-6</sup> | 1.60 × 10 <sup>-6</sup> | 8.05 × 10 <sup>-7</sup> | 6.82 × 10 <sup>-7</sup> | 3.16 × 10 <sup>-7</sup> | 1.57 × 10 <sup>-7</sup> |
| 100%RH    | 10 <sup>6</sup>                      | 2.75 × 10 <sup>-8</sup> | 1.17 × 10 <sup>-8</sup> | 5.98 × 10 <sup>-9</sup> | 5.01 × 10 <sup>-9</sup> | 2.33 × 10 <sup>-9</sup> | 1.16 × 10 <sup>-9</sup> |
|           | 10 <sup>7</sup>                      | 3.53 × 10 <sup>-7</sup> | 1.55 × 10 <sup>-7</sup> | 8.08 × 10 <sup>-8</sup> | 6.96 × 10 <sup>-8</sup> | 3.33 × 10 <sup>-8</sup> | 1.70 × 10 <sup>-8</sup> |
|           | 10 <sup>8</sup>                      | 2.75 × 10 <sup>-6</sup> | 1.17 × 10 <sup>-6</sup> | 5.98 × 10 <sup>-7</sup> | 5.01 × 10 <sup>-7</sup> | 2.33 × 10 <sup>-7</sup> | 1.16 × 10 <sup>-7</sup> |

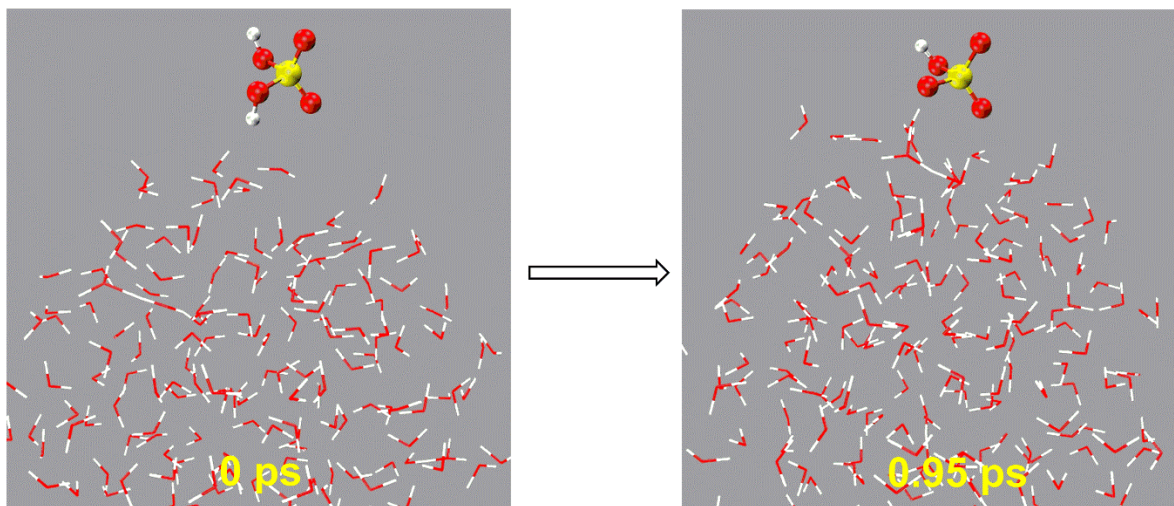

**Fig. S2** Snapshot structures taken from the BOMD simulations of  $\text{H}_2\text{SO}_4$  reaction at the air-water interface. The white, red and yellow spheres represent H, O and S atoms, respectively.

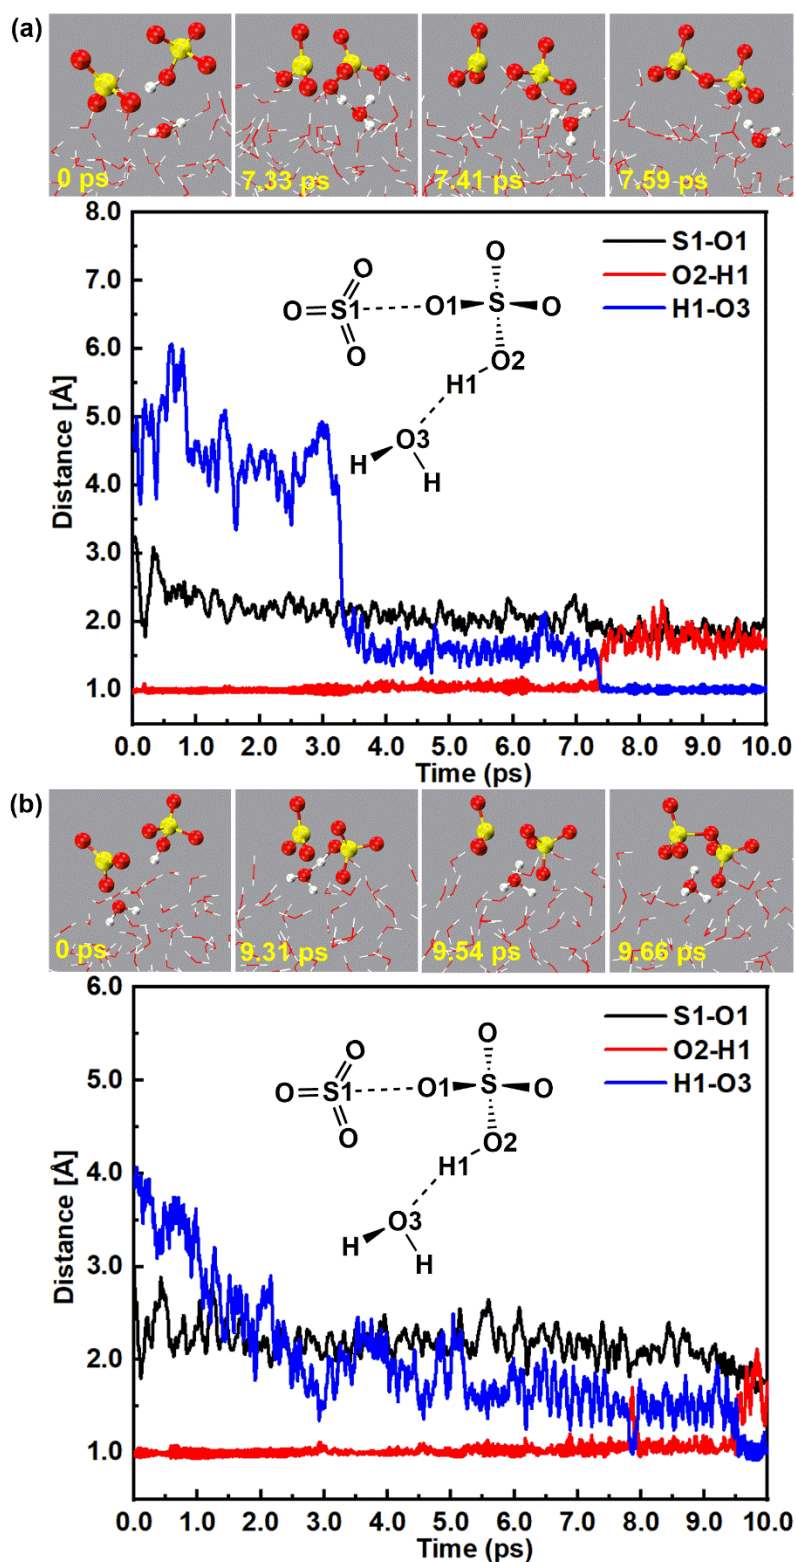

**Fig. S3** Two BOMD trajectories and snapshots for H<sub>2</sub>O-induced the formation of S<sub>2</sub>O<sub>7</sub><sup>2-</sup>•••H<sub>3</sub>O<sup>+</sup> ion pair from the reaction of SO<sub>3</sub> with HSO<sub>4</sub><sup>-</sup> at the air-water interface (Top panel: Snapshot structures taken from the BOMD simulations, which illustrate H<sub>2</sub>O-induced the formation of S<sub>2</sub>O<sub>7</sub><sup>2-</sup>•••H<sub>3</sub>O<sup>+</sup> ion pair from the reaction of SO<sub>3</sub> with HSO<sub>4</sub><sup>-</sup> at the air-water interface. Lower panel: time evolution of key bond distances (S-O1, O2-H1, and O3-H1) involved in the induced mechanism.)

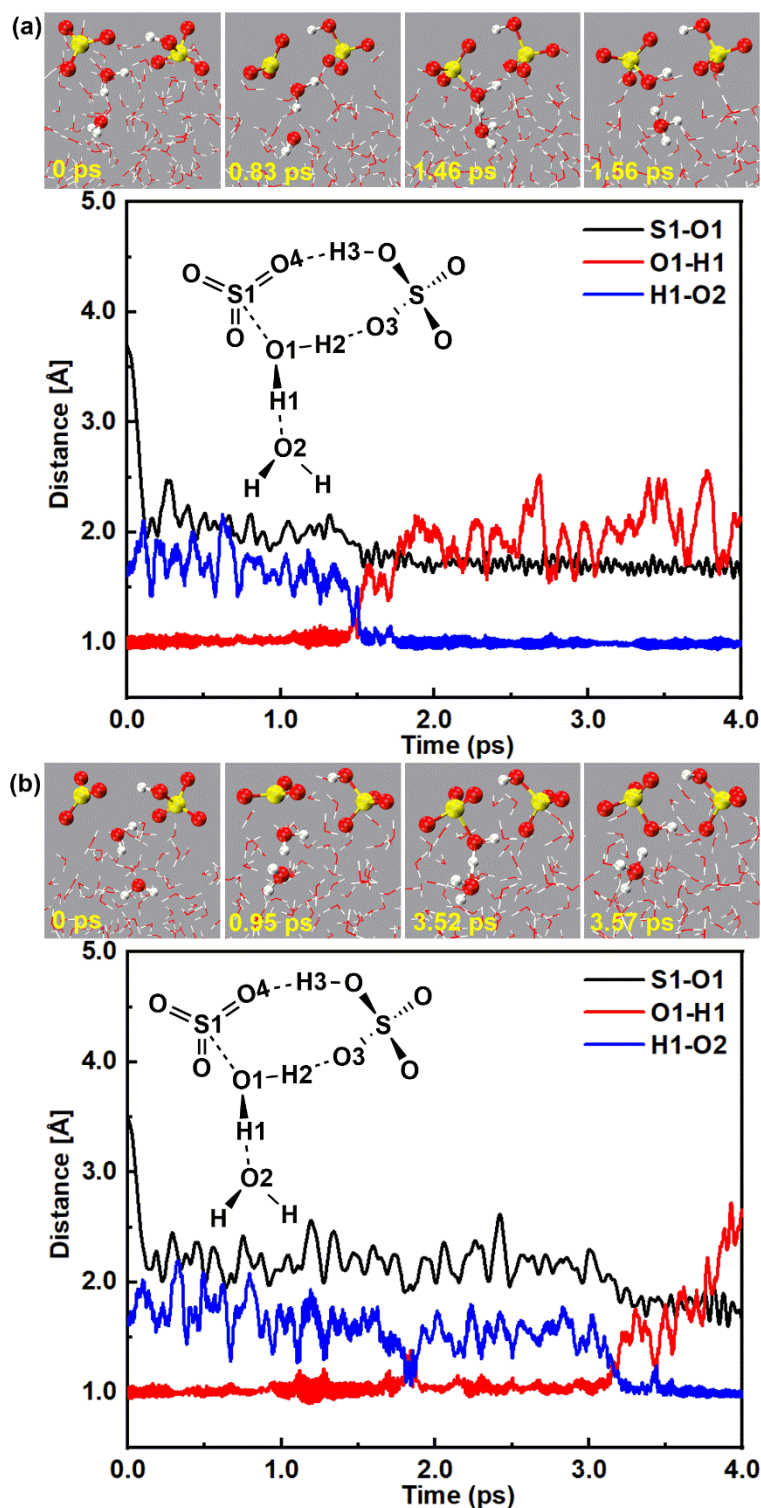

**Fig. S4** Two BOMD trajectories and snapshots for the direct HSO<sub>4</sub><sup>-</sup>-mediated formation of HSO<sub>4</sub><sup>-</sup>···H<sub>3</sub>O<sup>+</sup> ion pair at the air water interface (Top panel: Snapshot structures taken from the BOMD simulations, which illustrate the direct HSO<sub>4</sub><sup>-</sup>-mediated formation of HSO<sub>4</sub><sup>-</sup>···H<sub>3</sub>O<sup>+</sup> ion pair at the air water interface. Lower panel: time evolution of key bond distances (S1-O1, O1-H1 and H1-O2) involved in the hydration mechanism.)



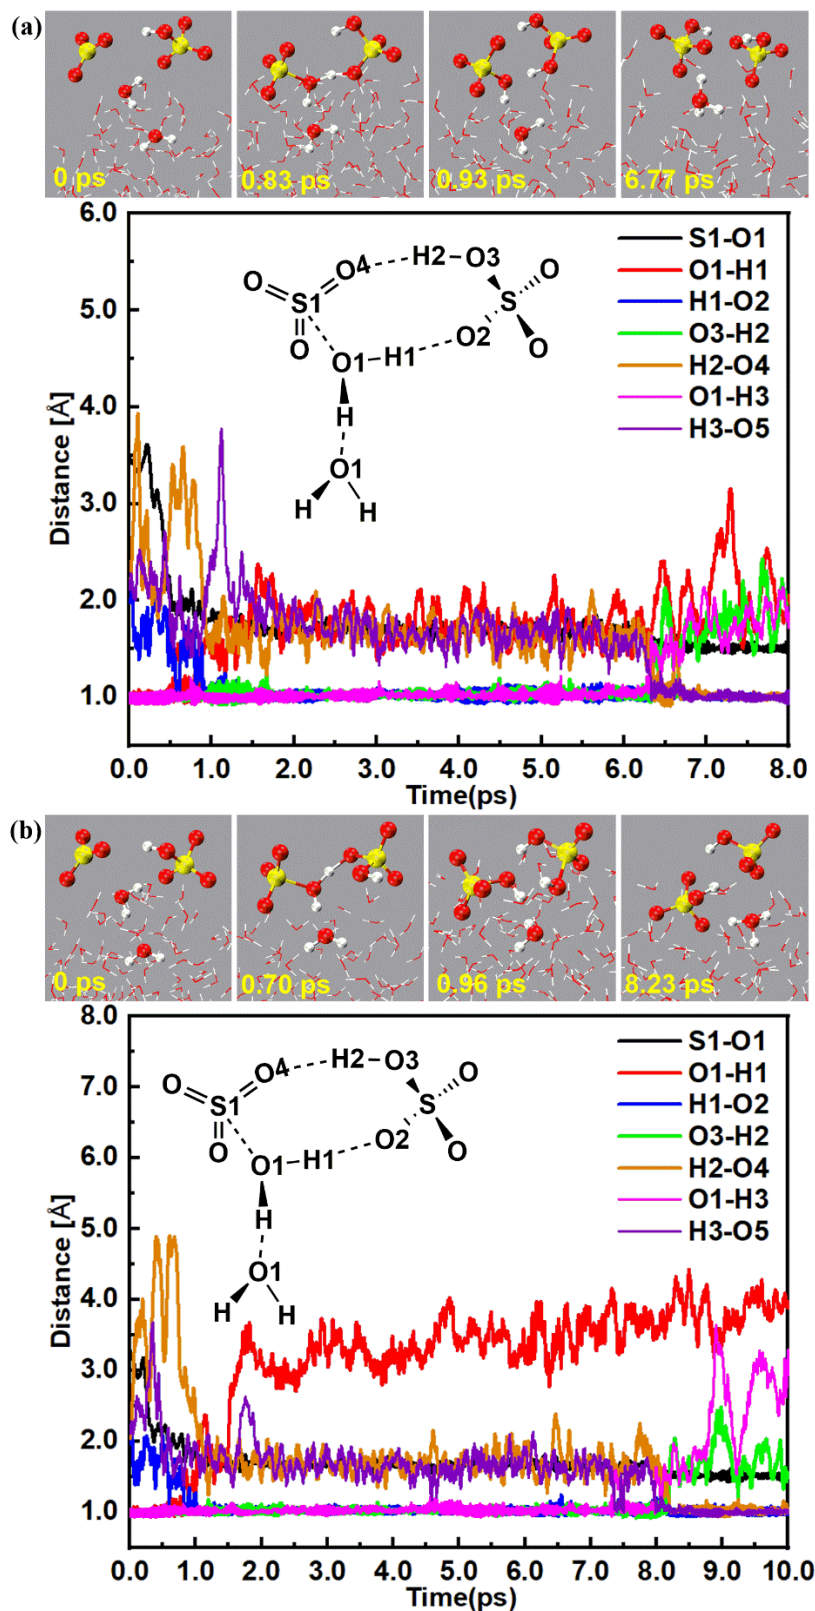

**Fig. S5** Two BOMD trajectories and snapshots for the indirect HSO<sub>4</sub><sup>-</sup>-mediated formation of HSO<sub>4</sub><sup>-</sup>...H<sub>3</sub>O<sup>+</sup> ion pair at the air water interface (Top panel: Snapshot structures taken from the BOMD simulations, which illustrate the indirect HSO<sub>4</sub><sup>-</sup>-mediated formation of HSO<sub>4</sub><sup>-</sup>...H<sub>3</sub>O<sup>+</sup> ion pair at the air water interface. Lower panel: time evolution of key bond distances (S1-O1, O1-H1 and H1-O2) involved in the hydration mechanism.)

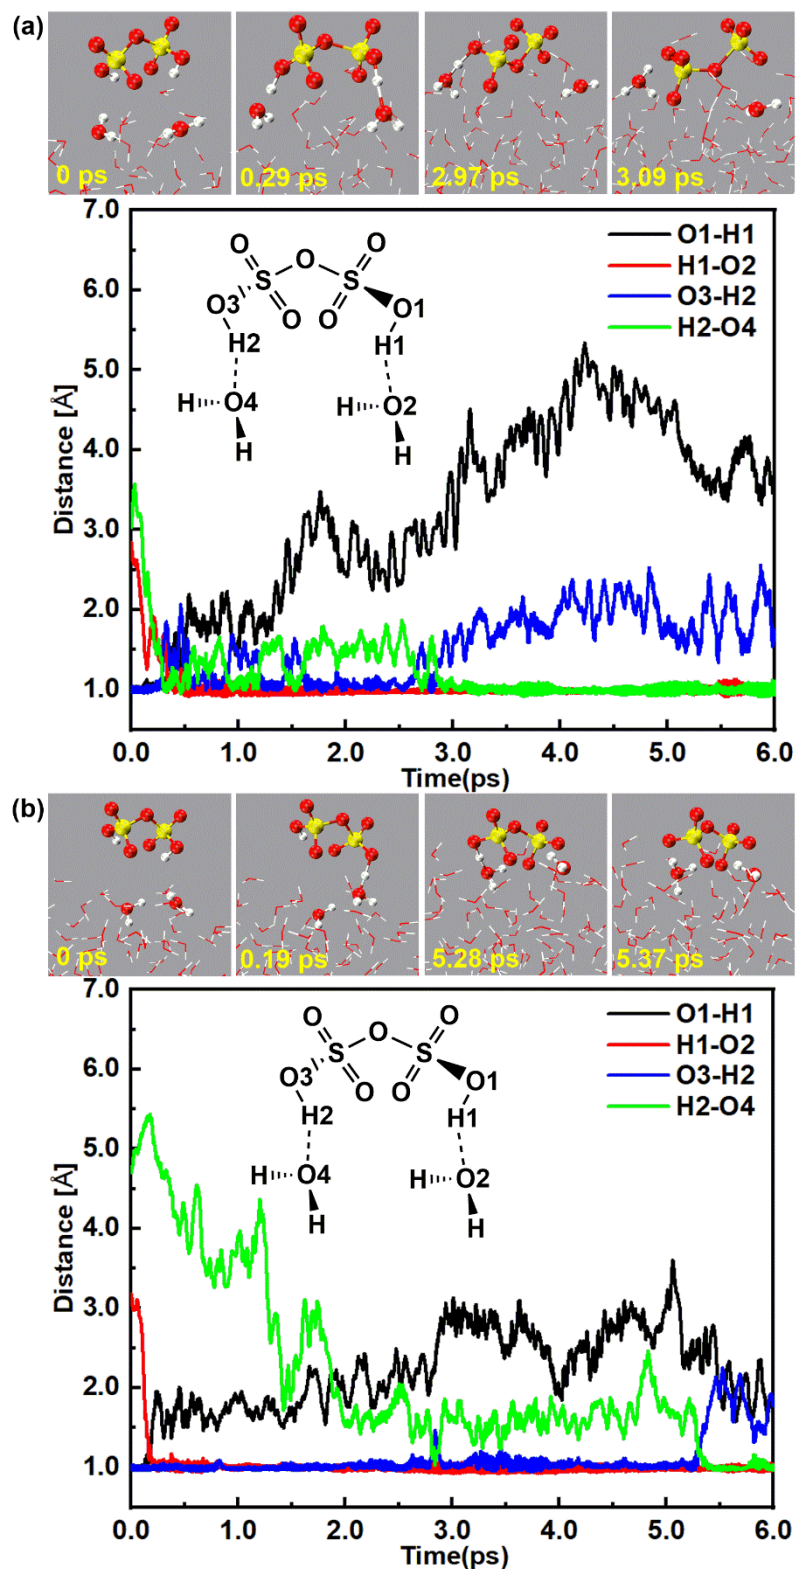

**Fig. S6** Two BOMD trajectories and snapshots for the deprotonation of  $\text{H}_2\text{S}_2\text{O}_7$  at the air water interface (Top panel: Snapshot structures taken from the BOMD simulations, which illustrate the deprotonation of  $\text{H}_2\text{S}_2\text{O}_7$  at the air water interface. Lower panel: time evolution of key bond distances (O1-H1, H1-O2, O3-H2 and H2-O4) involved in the hydration mechanism.)

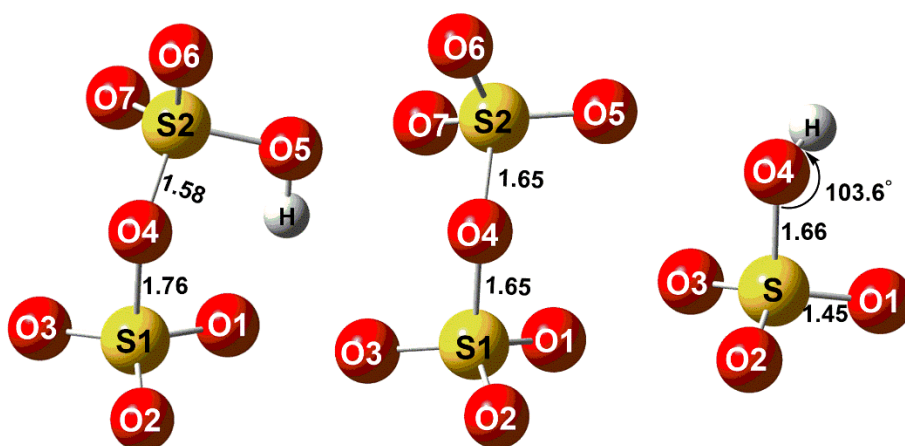

**Fig. S7** The optimized geometrical structures of  $\text{HS}_2\text{O}_7^-$ ,  $\text{S}_2\text{O}_7^{2-}$  and  $\text{HSO}_4^-$  ion at M06-2X/6-311++G(2df,2pd) level of theory

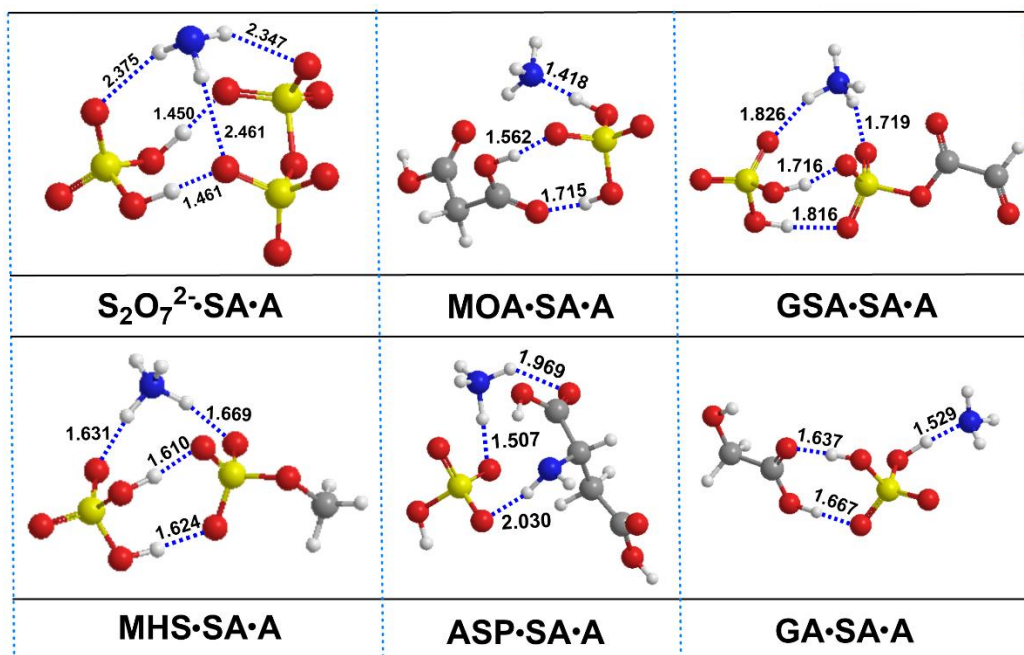

**Fig. S8** The most stable configurations of the (SA)<sub>1</sub>(A)<sub>1</sub>(Acid)<sub>1</sub> clusters identified at the M06-2X/6-311++G (2df,2pd) level of theory. SA<sup>-</sup>, SA, A, MOA, GSA, MHS, ASP and GA are respectively HS<sub>2</sub>O<sub>4</sub><sup>-</sup>, H<sub>2</sub>SO<sub>4</sub>, NH<sub>3</sub>, HOOCCH<sub>2</sub>COOH, HOCCOOSO<sub>3</sub>H, CH<sub>3</sub>OSO<sub>3</sub>H, HOCC(H)NH<sub>2</sub>COOH and HOCH<sub>2</sub>COOH. The lengths of hydrogen bonds are given in Å. (blue = nitrogen, yellow = sulfur, red = oxygen, gray = carbon, and white = hydrogen.)

**Table S7** Gibbs free energy ( $\Delta G$ , kcal·mol<sup>-1</sup>), equilibrium constant ( $K_{eq}$ , cm<sup>3</sup>·molecule<sup>-1</sup>) and the concentrations of SA, SO<sub>3</sub> and DSA computed at the CCSD(T)-F12/cc-pVDZ-F12//M06-2X/6-311++G(2df,2pd) level of theory

| $\Delta G$ | $T$ (K) | $K_{eq}$               | [SA]/(molecules·cm <sup>-3</sup> ) | [SO <sub>3</sub> ]/(molecules·cm <sup>-3</sup> ) | [DSA]/(molecules·cm <sup>-3</sup> ) |
|------------|---------|------------------------|------------------------------------|--------------------------------------------------|-------------------------------------|
|            | 218.15  | $6.79 \times 10^{-10}$ |                                    |                                                  | $6.79 \times 10^3$                  |
|            | 238.15  | $1.55 \times 10^{-11}$ |                                    |                                                  | $6.06 \times 10^2$                  |
| -7.0       | 258.15  | $6.44 \times 10^{-13}$ | $(1.00 \times 10^8)^a$             | $(1.00 \times 10^5)^b$                           | $2.51 \times 10^1$                  |
|            | 278.18  | $4.25 \times 10^{-14}$ |                                    |                                                  | $1.66 \times 10^0$                  |
|            | 298.15  | $4.07 \times 10^{-15}$ |                                    |                                                  | $1.59 \times 10^{-1}$               |

<sup>a</sup> The values were taken from reference (Liu, J., Fang, S., Wang, Z., Yi, W., Tao, F.-M., and Liu, J.-y.: Hydrolysis of sulfur dioxide in small clusters of sulfuric acid: Mechanistic and kinetic study, Environ. Sci. Technol., 49, 13112-13120, 2015.)

<sup>b</sup> The values were taken from reference (Yao, L., Fan, X., Yan, C., Kurtén, T., Daellenbach, K. R., Li, C., Wang, Y., Guo, Y., Dada, L., Rissanen, M. P., Cai, J., Tham, Y. J., Zha, Q., Zhang, S., Du, W., Yu, M., Zheng, F., Zhou, Y., Kontkanen, J., Chan, T., Shen, J., Kujansuu, J. T., Kangasluoma, J., Jiang, J., Wang, L., Worsnop, D. R., Petäjä, T., Kerminen, V. M., Liu, Y., Chu, B., He, H., Kulmala, M., and Bianchi, F.: Unprecedented ambient sulfur trioxide (SO<sub>3</sub>) detection: Possible formation mechanism and atmospheric implications, Environ. Sci. Technol. Lett., 7, 809-818, 10.1021/acs.estlett.0c00615, 2020.)

The equilibrium constant of H<sub>2</sub>S<sub>2</sub>O<sub>7</sub> within the temperature range of 218.15 - 298.15 K was  $6.79 \times 10^{-10}$  -  $4.07 \times 10^{-15}$  cm<sup>3</sup>·molecule<sup>-1</sup>. Taking into account typical tropospheric concentration of H<sub>2</sub>SO<sub>4</sub> ( $1.00 \times 10^8$  molecules·cm<sup>-3</sup>) and SO<sub>3</sub> ( $1.00 \times 10^5$  molecules·cm<sup>-3</sup>), it is estimated that the atmospheric concentration of the H<sub>2</sub>S<sub>2</sub>O<sub>7</sub> is  $1.59 \times 10^{-1} \times 10^1$ - $6.79 \times 10^3$  molecules·cm<sup>-3</sup> within the temperature range of 218.15 - 298.15 K.

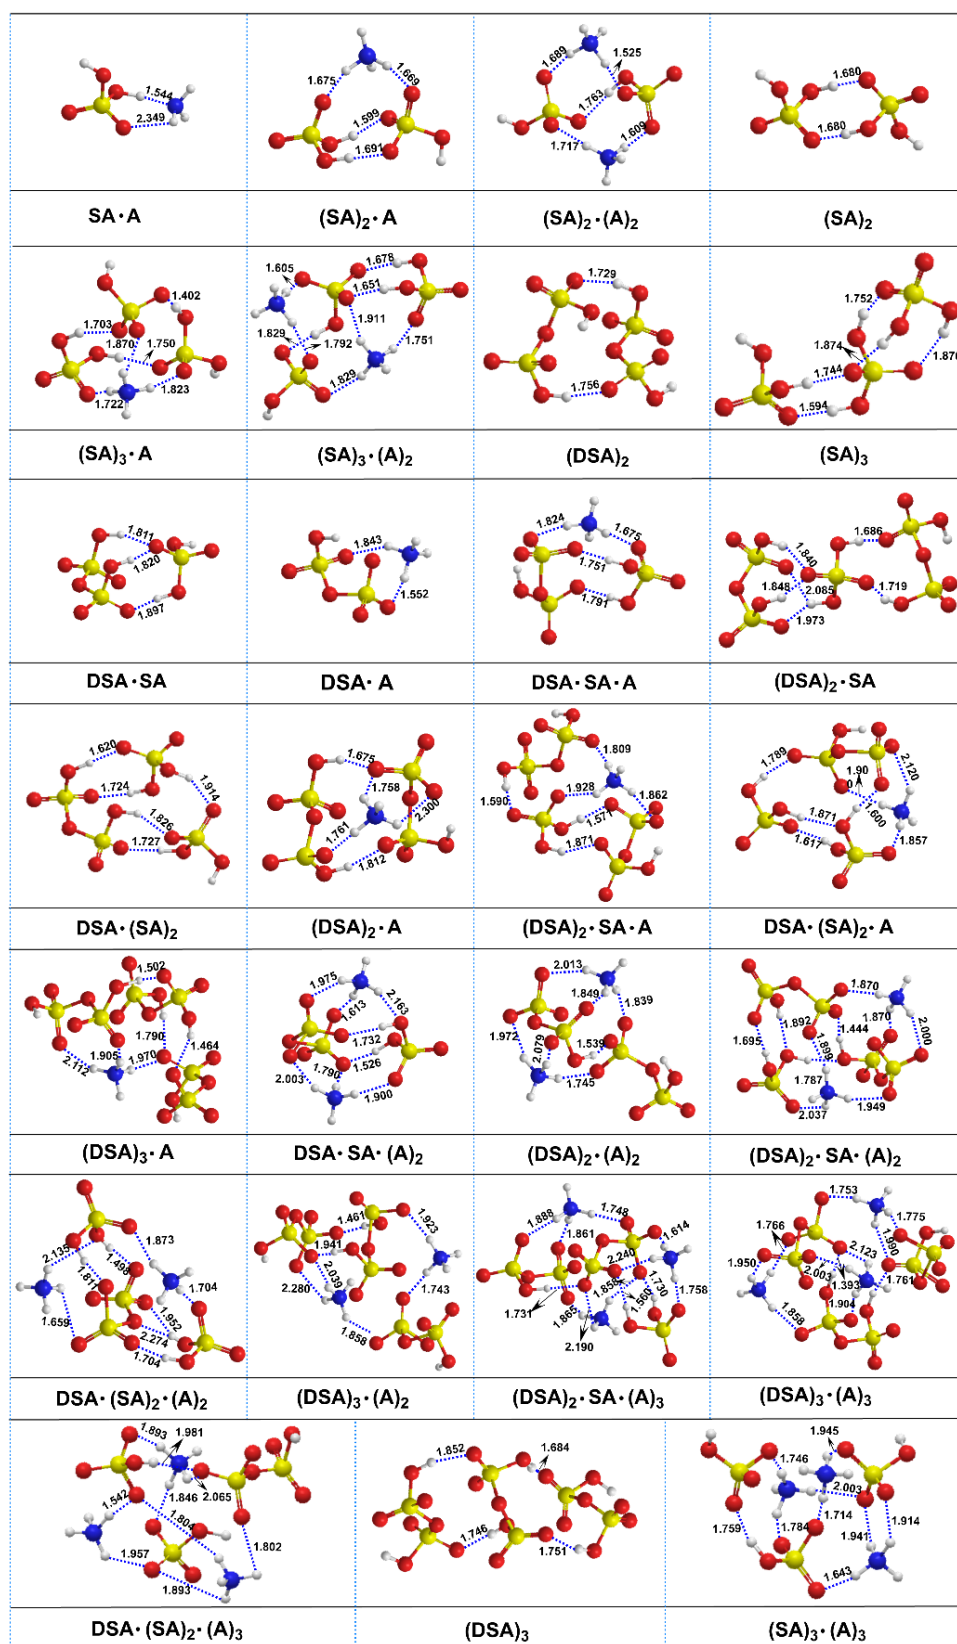

**Fig. S9** The most stable configurations of the DSA-SA-A-based clusters identified at the M06-2X/6-311++G(2df,2pd) level of theory. DSA, SA, A are the shorthand for disulfuric acid, sulfuric acid and ammonia, respectively. The lengths of hydrogen bonds are given in Å. (blue = nitrogen, yellow = sulfur, red = oxygen, gray = carbon, and white = hydrogen.)



**Table S8** The Gibbs free energy  $\Delta G$  (kcal·mol<sup>-1</sup>) of formation of all clusters at pressure of 1 atm and the temperature range of 218.15-298.15 K, calculated at DLPNO-CCSD(T)/aug-cc-pVTZ//M06-2X/6-311++G(2df,2pd) level of theory

| Clusters                                                | $T = 298.15$ K   | $T = 278.15$ K   | $T = 258.15$ K   | $T = 238.15$ K    | $T = 218.15$ K   |
|---------------------------------------------------------|------------------|------------------|------------------|-------------------|------------------|
| (DSA) <sub>2</sub>                                      | -5.0             | -5.8             | -6.7             | -7.5              | -8.4             |
| (DSA) <sub>3</sub>                                      | -4.6             | -6.2             | -7.9             | -9.6              | -11.3            |
| (SA) <sub>1</sub> ·(DSA) <sub>1</sub>                   | -4.7             | -5.5             | -6.3             | -7.2              | -8.0             |
| (SA) <sub>1</sub> ·(DSA) <sub>2</sub>                   | -8.8             | -10.4            | -12.1            | -13.7             | -16.0            |
| (SA) <sub>2</sub> ·(DSA) <sub>1</sub>                   | -6.8             | -8.6             | -10.4            | -12.2             | -14.0            |
| (DSA) <sub>1</sub> ·(A) <sub>1</sub>                    | -15.3            | -16.1            | -16.9            | -17.6             | -18.4            |
| (DSA) <sub>2</sub> ·(A) <sub>1</sub>                    | -24.8            | -26.4            | -28.0            | -29.7             | -31.3            |
| (DSA) <sub>3</sub> ·(A) <sub>1</sub>                    | -32.3            | -34.8            | -37.4            | -40.0             | -42.5            |
| (DSA) <sub>2</sub> ·(A) <sub>2</sub>                    | -41.9            | -44.3            | -46.7            | -49.1             | -51.5            |
| (SA) <sub>1</sub> ·(DSA) <sub>1</sub> ·(A) <sub>1</sub> | -25.9            | -27.4            | -29.0            | -30.5             | -32.0            |
| (SA) <sub>1</sub> ·(DSA) <sub>2</sub> ·(A) <sub>1</sub> | -32.8            | -35.3            | -37.8            | -40.3             | -43.3            |
| (SA) <sub>2</sub> ·(DSA) <sub>1</sub> ·(A) <sub>1</sub> | -31.9            | -34.2            | -36.6            | -38.9             | -41.3            |
| (SA) <sub>1</sub> ·(DSA) <sub>1</sub> ·(A) <sub>2</sub> | -37.9            | -40.3            | -42.8            | -45.2             | -47.7            |
| (SA) <sub>1</sub> ·(DSA) <sub>2</sub> ·(A) <sub>2</sub> | -49.1            | -52.4            | -55.7            | -59.0             | -62.3            |
| (SA) <sub>2</sub> ·(DSA) <sub>1</sub> ·(A) <sub>2</sub> | -48.4            | -51.7            | -55.0            | -58.3             | -61.6            |
| (SA) <sub>2</sub> ·(DSA) <sub>1</sub> ·(A) <sub>3</sub> | -61.3            | -65.2            | -69.1            | -73.0             | -77.0            |
| (SA) <sub>1</sub> ·(DSA) <sub>2</sub> ·(A) <sub>3</sub> | -73.9            | -77.9            | -81.8            | -85.8             | -89.8            |
| (DSA) <sub>3</sub> ·(A) <sub>3</sub>                    | -69.5            | -73.6            | -77.6            | -81.7             | -85.8            |
| (DSA) <sub>3</sub> ·(A) <sub>2</sub>                    | -51.6            | -54.8            | -58.1            | -61.4             | -64.7            |
| (SA) <sub>2</sub>                                       | -7.8<br>(-8.4)   | -8.6<br>(-9.1)   | -9.1<br>(-9.8)   | -9.8<br>(-10.5)   | -10.5<br>(-11.1) |
| (SA) <sub>3</sub>                                       | -12.5<br>(-13.9) | -14.0<br>(-15.5) | -15.7<br>(-17.0) | -17.1<br>(-18.5)  | -18.7<br>(-20.1) |
| (SA) <sub>1</sub> ·(A) <sub>1</sub>                     | -5.7<br>(-7.3)   | -6.3<br>(-7.9)   | -7.0<br>(-8.5)   | -7.6<br>(-9.2)    | -8.3<br>(-9.8)   |
| (SA) <sub>2</sub> ·(A) <sub>1</sub>                     | -20.5<br>(-20.8) | -22.0<br>(-22.4) | -23.5<br>(-24.0) | -25.1<br>(-25.5)  | -26.6<br>(-27.1) |
| (SA) <sub>2</sub> ·(A) <sub>2</sub>                     | -26.6<br>(-26.6) | -28.9<br>(-28.8) | -31.1<br>(-31.0) | -33.4<br>(-33.28) | -35.6<br>(-35.5) |
| (SA) <sub>3</sub> ·(A) <sub>1</sub>                     | -27.4<br>(-30.2) | -29.8<br>(-32.5) | -32.2<br>(-34.8) | -34.6<br>(-37.1)  | -37.2<br>(-39.5) |
| (SA) <sub>3</sub> ·(A) <sub>2</sub>                     | -40.5<br>(-41.8) | -43.6<br>(-44.9) | -46.7<br>(-47.9) | -49.8<br>(-51.0)  | -52.9<br>(-54.1) |
| (SA) <sub>3</sub> ·(A) <sub>3</sub>                     | -51.2<br>(-52.8) | -55.0<br>(-56.6) | -58.9<br>(-60.5) | -62.8<br>(-64.3)  | -66.7<br>(-68.1) |

The values in parentheses were taken from (Zhang, H., Kupiainen-Määttä, O., Zhang, X., Molinero, V., Zhang, Y., and Li, Z.: The enhancement mechanism of glycolic acid on the formation of atmospheric sulfuric acid–ammonia molecular clusters, *J. Chem. Phys.*, 146, 184308, 10.1063/1.4982929, 2017.)

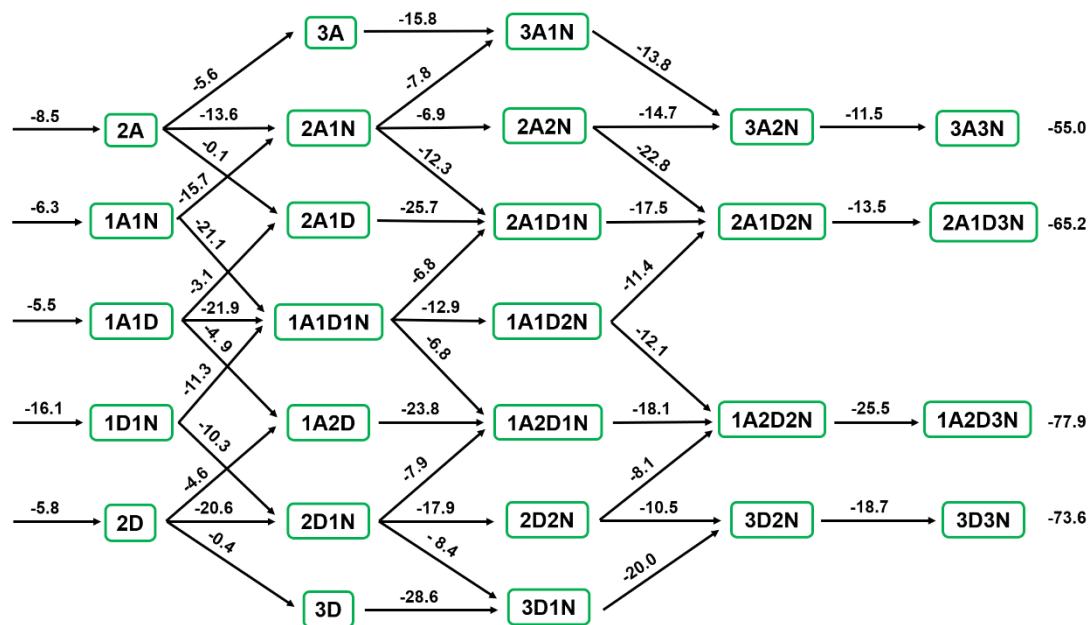

**Fig. S10** The Gibbs free energy (kcal·mol<sup>-1</sup>) diagram of (DSA)<sub>x</sub>(SA)<sub>y</sub>(A)<sub>z</sub> ( $z \leq x + y \leq 3$ ) clusters at 278.15K and 1 atm. “A” refers to sulfuric acid, “D” refers to disulfuric acid and “N” refers to ammonia



#### Part 4 Collision coefficients and evaporation coefficients

The collision rate coefficient  $\beta_{i,j}$  between clusters  $i$  and  $j$  was calculated using hard-sphere collision theory (Chapman and Cowling, 1990) in Eq. (S5).

$$\beta_{i,j} = \pi(r_i + r_j)^2 \sqrt{\frac{8k_B T}{\pi\mu}} \quad (\text{S5})$$

Where  $r_i$  is the radius of cluster  $i$ , defined as the sum of distance between the two farthest atom in cluster  $i$  and half of the van der Waals radii of these two atoms and given by Multiwfn\_3.7 software (Lu and Chen, 2012);  $k_B$  is the Boltzmann constant;  $T$  is the temperature and  $\mu = m_i \cdot m_j / (m_i + m_j)$  is the reduced mass.

The evaporation coefficient  $\gamma_{(i+j) \rightarrow i}$  was computed using the corresponding collision coefficients and the Gibbs free energies of formation of the clusters as show in Eq. (S6).

$$\gamma_{(i+j) \rightarrow i} = \beta_{i,j} \frac{p_{ref}}{k_B T} \exp\left(\frac{\Delta G_{i+j} - \Delta G_i - \Delta G_j}{k_B T}\right) \quad (\text{S6})$$

Where  $p_{ref}$  is the reference pressure (1 atm in current study) at which the Gibbs free energies have been calculated, and  $\Delta G_{i+j}$  is the Gibbs free energy of formation of cluster  $i+j$  from monomers  $i$  and  $j$ .

#### Reference

- Chapman, S., and Cowling, T. G.: The mathematical theory of non-uniform gases: an account of the kinetic theory of viscosity, thermal conduction and diffusion in gases, Cambridge university press, 1990.
- Lu, T., and Chen, F.: Multiwfn: A multifunctional wavefunction analyzer, J. Comput. Chem., 33, 580-592, <https://doi.org/10.1002/jcc.22885>, 2012.

## Part 5 Boundary conditions and concentration range

The maximum number of acid or basic molecules in the studied system is three. Whether a cluster is allowed to leave the size range under study depends on the boundary conditions. The boundary conditions in the ACDC require that the smallest clusters outside of the simulated system should be very stable so that not to evaporate back immediately (McGrath et al., 2012). Only clusters allowed to grow out of the studied system can be considered to contribute to the clusters' formation rate. For the atmospheric new particle formation (NPF), the stability of the corresponding cluster could be determined by comparing the collision rate and evaporation rate. The results from the studied clusters show that the collision rate coefficients are on the same order of magnitude ( $10^{10}$ – $10^{11}$  molecules<sup>-1</sup> cm<sup>3</sup> s<sup>-1</sup>, shown in Table S9). Based on cluster volatilization rate (shown in Table S10) and the formation Gibbs free energy of the clusters (shown in Table S8), the cluster boundary conditions simulated in this study were set as (SA)<sub>4</sub>·(A)<sub>3</sub> and SA·(A)<sub>3</sub>·(DSA)<sub>3</sub>

According to field observations, the concentration of SA and A was respectively set in a range of  $10^6$  ~  $10^8$  molecules·cm<sup>-3</sup> and  $10^7$  ~  $10^{11}$  molecules cm<sup>-3</sup> (Almeida et al., 2013; Kuang et al., 2008; Bouo et al., 2011; Zhang et al., 2018). As the prediction in Table S7, the concentration of DSA is set to  $10^1$  ~  $10^3$  molecules cm<sup>-3</sup>. Besides, the temperature was set to be 218.15~278.15 K, which span most regions of the troposphere and the polluted atmospheric boundary layer.

## Reference

- Almeida, J., Schobesberger, S., Kürten, A., Ortega, I. K., Kupiainen-Määttä, O., Praplan, A. P., Adamov, A., Amorim, A., Bianchi, F., Breitenlechner, M., David, A., Dommen, J., Donahue, N. M., Downard, A., Dunne, E., Duplissy, J., Ehrhart, S., Flagan, R. C., Franchin, A., Guida, R., Hakala, J., Hansel, A., Heinritzi, M., Henschel, H., Jokinen, T., Junninen, H., Kajos, M., Kangasluoma, J., Keskinen, H., Kupc, A., Kurtén, T., Kvashin, A. N., Laaksonen, A., Lehtipalo, K., Leiminger, M., Leppä, J., Loukonen, V., Makhmutov, V., Mathot, S., McGrath, M. J., Nieminen, T., Olenius, T., Onnela, A., Petäjä, T., Riccobono, F., Riipinen, I., Rissanen, M., Rondo, L., Ruuskanen, T., Santos, F. D., Sarnela, N., Schallhart, S., Schnitzhofer, R., Seinfeld, J. H., Simon, M., Sipilä, M., Stozhkov, Y., Stratmann, F., Tomé, A., Tröstl, J., Tsagkogeorgas, G., Vaattovaara, P., Viisanen, Y., Virtanen, A., Vrtala, A., Wagner, P. E., Weingartner, E., Wex, H., Williamson, C., Wimmer, D., Ye, P., Yli-Juuti, T., Carslaw, K. S., Kulmala, M., Curtius, J., Baltensperger, U., Worsnop, D. R., Vehkamäki, H., and Kirkby, J.: Molecular understanding of sulphuric acid–amine particle nucleation in the atmosphere, *Nature*, 502, 359-363, 10.1038/nature12663, 2013.
- Bouo, F.-X., Kouamé, J., Tchétché, Y., Kré, R., Moussé, M., Assamoi, P., Cautenet, S., and Cautenet, G.: Redistribution of free tropospheric chemical species over West Africa: Radicals (OH and HO<sub>2</sub>), peroxide (H<sub>2</sub>O<sub>2</sub>) and acids (HNO<sub>3</sub> and H<sub>2</sub>SO<sub>4</sub>), *Chemosphere*, 84, 1617-1629, 2011.

- Kuang, C., McMurry, P. H., McCormick, A. V., and Eisele, F.: Dependence of nucleation rates on sulfuric acid vapor concentration in diverse atmospheric locations, *J. Geophys. Res. Atmos.*, 113, 2008.
- McGrath, M. J., Olenius, T., Ortega, I. K., Loukonen, V., Paasonen, P., Kurtén, T., Kulmala, M., and Vehkamäki, H.: Atmospheric Cluster Dynamics Code: a flexible method for solution of the birth-death equations, *Atmos. Chem. Phys.*, 12, 2345-2355, 10.5194/acp-12-2345-2012, 2012.
- Zhang, H., Li, H., Liu, L., Zhang, Y., Zhang, X., and Li, Z.: The potential role of malonic acid in the atmospheric sulfuric acid-ammonia clusters formation, *Chemosphere*, 203, 26-33, 2018.

**Table S9** Collision coefficients ( $\beta$ ,  $\text{cm}^3\cdot\text{s}^{-1}$ ) for each cluster in the present study

| Collisions                                 | $\beta$ , $\text{cm}^3\cdot\text{s}^{-1}$ |                        |                        |                        |                        |
|--------------------------------------------|-------------------------------------------|------------------------|------------------------|------------------------|------------------------|
|                                            | 298.15 K                                  | 278.15 K               | 258.15 K               | 238.15 K               | 218.15 K               |
| SA + A                                     | $1.65 \times 10^{-10}$                    | $1.54 \times 10^{-10}$ | $1.43 \times 10^{-10}$ | $1.32 \times 10^{-10}$ | $1.20 \times 10^{-10}$ |
| SA + DSA                                   | $7.02 \times 10^{-11}$                    | $6.55 \times 10^{-11}$ | $6.08 \times 10^{-11}$ | $5.61 \times 10^{-11}$ | $5.14 \times 10^{-11}$ |
| DSA + A                                    | $2.15 \times 10^{-10}$                    | $2.00 \times 10^{-10}$ | $1.86 \times 10^{-10}$ | $1.71 \times 10^{-10}$ | $1.57 \times 10^{-10}$ |
| SA + SA                                    | $6.81 \times 10^{-11}$                    | $6.35 \times 10^{-11}$ | $5.90 \times 10^{-11}$ | $5.44 \times 10^{-11}$ | $4.98 \times 10^{-11}$ |
| DSA + DSA                                  | $6.40 \times 10^{-11}$                    | $5.97 \times 10^{-11}$ | $5.54 \times 10^{-11}$ | $5.11 \times 10^{-11}$ | $4.68 \times 10^{-11}$ |
| (SA) <sub>2</sub> + A                      | $3.03 \times 10^{-10}$                    | $2.83 \times 10^{-10}$ | $2.62 \times 10^{-10}$ | $2.42 \times 10^{-10}$ | $2.22 \times 10^{-10}$ |
| SA·A + SA                                  | $8.90 \times 10^{-11}$                    | $8.31 \times 10^{-11}$ | $7.71 \times 10^{-11}$ | $7.11 \times 10^{-11}$ | $6.51 \times 10^{-11}$ |
| (SA) <sub>2</sub> ·A + A                   | $2.81 \times 10^{-10}$                    | $2.62 \times 10^{-10}$ | $2.43 \times 10^{-10}$ | $2.25 \times 10^{-10}$ | $2.06 \times 10^{-10}$ |
| (DSA) <sub>2</sub> + A                     | $3.25 \times 10^{-10}$                    | $3.03 \times 10^{-10}$ | $2.81 \times 10^{-10}$ | $2.59 \times 10^{-10}$ | $2.38 \times 10^{-10}$ |
| DSA·A + DSA                                | $6.95 \times 10^{-11}$                    | $6.48 \times 10^{-11}$ | $6.01 \times 10^{-11}$ | $5.55 \times 10^{-11}$ | $5.08 \times 10^{-11}$ |
| (DSA) <sub>2</sub> ·A + A                  | $3.37 \times 10^{-10}$                    | $3.15 \times 10^{-10}$ | $2.92 \times 10^{-10}$ | $2.70 \times 10^{-10}$ | $2.47 \times 10^{-10}$ |
| (SA) <sub>2</sub> + DSA                    | $8.05 \times 10^{-11}$                    | $7.51 \times 10^{-11}$ | $6.97 \times 10^{-11}$ | $6.43 \times 10^{-11}$ | $5.89 \times 10^{-11}$ |
| SA·DSA + SA                                | $8.62 \times 10^{-11}$                    | $8.04 \times 10^{-11}$ | $7.46 \times 10^{-11}$ | $6.89 \times 10^{-11}$ | $6.31 \times 10^{-11}$ |
| (DSA) <sub>2</sub> + SA                    | $8.65 \times 10^{-11}$                    | $8.07 \times 10^{-11}$ | $7.49 \times 10^{-11}$ | $6.91 \times 10^{-11}$ | $6.33 \times 10^{-11}$ |
| SA·DSA + DSA                               | $7.13 \times 10^{-11}$                    | $6.65 \times 10^{-11}$ | $6.17 \times 10^{-11}$ | $5.69 \times 10^{-11}$ | $5.21 \times 10^{-11}$ |
| (SA) <sub>2</sub> + SA                     | $9.26 \times 10^{-11}$                    | $8.64 \times 10^{-11}$ | $8.02 \times 10^{-11}$ | $7.40 \times 10^{-11}$ | $6.77 \times 10^{-11}$ |
| (DSA) <sub>2</sub> + DSA                   | $6.88 \times 10^{-11}$                    | $6.42 \times 10^{-11}$ | $5.96 \times 10^{-11}$ | $5.50 \times 10^{-11}$ | $5.04 \times 10^{-11}$ |
| SA + (SA) <sub>2</sub> ·A                  | $8.48 \times 10^{-11}$                    | $7.91 \times 10^{-11}$ | $7.34 \times 10^{-11}$ | $6.78 \times 10^{-11}$ | $6.21 \times 10^{-11}$ |
| (SA) <sub>3</sub> + A                      | $3.93 \times 10^{-10}$                    | $3.67 \times 10^{-10}$ | $3.41 \times 10^{-10}$ | $3.14 \times 10^{-10}$ | $2.88 \times 10^{-10}$ |
| (SA) <sub>2</sub> ·(A) <sub>2</sub> + SA   | $9.26 \times 10^{-11}$                    | $8.64 \times 10^{-11}$ | $8.02 \times 10^{-11}$ | $7.40 \times 10^{-11}$ | $6.78 \times 10^{-11}$ |
| (SA) <sub>3</sub> ·A + A                   | $3.13 \times 10^{-10}$                    | $2.92 \times 10^{-10}$ | $2.71 \times 10^{-10}$ | $2.50 \times 10^{-10}$ | $2.29 \times 10^{-10}$ |
| (SA) <sub>3</sub> ·(A) <sub>2</sub> + A    | $4.08 \times 10^{-10}$                    | $3.80 \times 10^{-10}$ | $3.53 \times 10^{-10}$ | $3.26 \times 10^{-10}$ | $2.98 \times 10^{-10}$ |
| (DSA) <sub>2</sub> ·A + DSA                | $7.00 \times 10^{-11}$                    | $6.53 \times 10^{-11}$ | $6.06 \times 10^{-11}$ | $5.59 \times 10^{-11}$ | $5.12 \times 10^{-11}$ |
| (DSA) <sub>3</sub> + A                     | $4.90 \times 10^{-10}$                    | $4.57 \times 10^{-10}$ | $4.24 \times 10^{-10}$ | $3.91 \times 10^{-10}$ | $3.58 \times 10^{-10}$ |
| (DSA) <sub>2</sub> ·(A) <sub>2</sub> + DSA | $7.76 \times 10^{-11}$                    | $7.24 \times 10^{-11}$ | $6.72 \times 10^{-11}$ | $6.20 \times 10^{-11}$ | $5.68 \times 10^{-11}$ |
| (DSA) <sub>3</sub> ·A + A                  | $4.17 \times 10^{-10}$                    | $3.89 \times 10^{-10}$ | $3.61 \times 10^{-10}$ | $3.33 \times 10^{-10}$ | $3.05 \times 10^{-10}$ |
| (DSA) <sub>3</sub> ·(A) <sub>2</sub> + A   | $4.78 \times 10^{-10}$                    | $4.46 \times 10^{-10}$ | $4.14 \times 10^{-10}$ | $3.82 \times 10^{-10}$ | $3.50 \times 10^{-10}$ |
| DSA·A + SA                                 | $7.85 \times 10^{-11}$                    | $7.32 \times 10^{-11}$ | $6.79 \times 10^{-11}$ | $6.27 \times 10^{-11}$ | $5.74 \times 10^{-11}$ |
| SA·A + DSA                                 | $8.60 \times 10^{-11}$                    | $8.02 \times 10^{-11}$ | $7.44 \times 10^{-11}$ | $6.87 \times 10^{-11}$ | $6.29 \times 10^{-11}$ |
| SA·DSA + A                                 | $3.06 \times 10^{-10}$                    | $2.86 \times 10^{-10}$ | $2.65 \times 10^{-10}$ | $2.45 \times 10^{-10}$ | $2.24 \times 10^{-10}$ |
| SA·DSA·A + A                               | $3.03 \times 10^{-10}$                    | $2.83 \times 10^{-10}$ | $2.62 \times 10^{-10}$ | $2.42 \times 10^{-10}$ | $2.22 \times 10^{-10}$ |
| SA·DSA·A + SA                              | $8.43 \times 10^{-11}$                    | $7.87 \times 10^{-11}$ | $7.30 \times 10^{-11}$ | $6.74 \times 10^{-11}$ | $6.17 \times 10^{-11}$ |

|                                    |                        |                        |                        |                        |                        |
|------------------------------------|------------------------|------------------------|------------------------|------------------------|------------------------|
| $(SA)_2 \cdot A + DSA$             | $7.33 \times 10^{-11}$ | $6.84 \times 10^{-11}$ | $6.35 \times 10^{-11}$ | $5.86 \times 10^{-11}$ | $5.36 \times 10^{-11}$ |
| $(SA)_2 \cdot DSA + A$             | $3.80 \times 10^{-10}$ | $3.54 \times 10^{-10}$ | $3.29 \times 10^{-10}$ | $3.03 \times 10^{-10}$ | $2.78 \times 10^{-10}$ |
| $SA \cdot DSA \cdot (A)_2 + SA$    | $8.09 \times 10^{-11}$ | $7.55 \times 10^{-11}$ | $7.00 \times 10^{-11}$ | $6.46 \times 10^{-11}$ | $5.92 \times 10^{-11}$ |
| $(SA)_2 \cdot (A)_2 + DSA$         | $7.83 \times 10^{-11}$ | $7.30 \times 10^{-11}$ | $6.78 \times 10^{-11}$ | $6.25 \times 10^{-11}$ | $5.73 \times 10^{-11}$ |
| $(SA)_2 \cdot DSA \cdot A + A$     | $3.25 \times 10^{-10}$ | $3.03 \times 10^{-10}$ | $2.82 \times 10^{-10}$ | $2.60 \times 10^{-10}$ | $2.38 \times 10^{-10}$ |
| $(SA)_2 \cdot DSA \cdot (A)_2 + A$ | $4.22 \times 10^{-10}$ | $3.93 \times 10^{-10}$ | $3.65 \times 10^{-10}$ | $3.37 \times 10^{-10}$ | $3.08 \times 10^{-10}$ |
| $(DSA)_2 \cdot A + SA$             | $8.88 \times 10^{-11}$ | $8.28 \times 10^{-11}$ | $7.69 \times 10^{-11}$ | $7.09 \times 10^{-11}$ | $6.49 \times 10^{-11}$ |
| $SA \cdot DSA \cdot A + DSA$       | $6.92 \times 10^{-11}$ | $6.46 \times 10^{-11}$ | $5.99 \times 10^{-11}$ | $5.53 \times 10^{-11}$ | $5.06 \times 10^{-11}$ |
| $SA \cdot (DSA)_2 + A$             | $3.31 \times 10^{-10}$ | $3.08 \times 10^{-10}$ | $2.86 \times 10^{-10}$ | $2.64 \times 10^{-10}$ | $2.42 \times 10^{-10}$ |
| $(DSA)_2 \cdot (A)_2 + SA$         | $1.00 \times 10^{-10}$ | $9.34 \times 10^{-11}$ | $8.67 \times 10^{-11}$ | $8.00 \times 10^{-11}$ | $7.33 \times 10^{-11}$ |
| $SA \cdot DSA \cdot (A)_2 + DSA$   | $6.61 \times 10^{-11}$ | $6.17 \times 10^{-11}$ | $5.72 \times 10^{-11}$ | $5.28 \times 10^{-11}$ | $4.84 \times 10^{-11}$ |
| $SA \cdot (DSA)_2 \cdot A + A$     | $4.19 \times 10^{-10}$ | $3.91 \times 10^{-10}$ | $3.63 \times 10^{-10}$ | $3.35 \times 10^{-10}$ | $3.06 \times 10^{-10}$ |
| $SA \cdot (DSA)_2 \cdot (A)_2 + A$ | $3.84 \times 10^{-10}$ | $3.58 \times 10^{-10}$ | $3.32 \times 10^{-10}$ | $3.06 \times 10^{-10}$ | $2.81 \times 10^{-10}$ |

---

**Table S10** Evaporation rates ( $s^{-1}$ ) of the studied clusters at different temperatures of 298.15, 278.15, 258.15, 238.15 and 218.15 K

| Evaporation pathways                                                                 | 298.15 K                                           | 278.15 K                                           | 258.15 K                                           | 238.15 K                                           | 218.15 K                                            |
|--------------------------------------------------------------------------------------|----------------------------------------------------|----------------------------------------------------|----------------------------------------------------|----------------------------------------------------|-----------------------------------------------------|
| $(SA)_2 \rightarrow SA + SA$                                                         | $3.36 \times 10^3$<br>( $2.89 \times 10^3$ )       | $3.81 \times 10^2$<br>( $3.14 \times 10^2$ )       | $3.07 \times 10^1$<br>( $2.46 \times 10^1$ )       | $1.61 \times 10^0$<br>( $1.23 \times 10^0$ )       | $4.91 \times 10^{-2}$<br>( $3.51 \times 10^{-2}$ )  |
| $(SA)_3 \rightarrow (SA)_2 + SA$                                                     | $7.99 \times 10^5$<br>( $1.22 \times 10^6$ )       | $9.55 \times 10^4$<br>( $1.34 \times 10^5$ )       | $8.20 \times 10^3$<br>( $1.05 \times 10^4$ )       | $4.64 \times 10^2$<br>( $5.40 \times 10^2$ )       | $1.54 \times 10^1$<br>( $1.58 \times 10^1$ )        |
| $(SA)_1 \cdot (A)_1 \rightarrow SA + A$                                              | $2.67 \times 10^5$<br>( $4.76 \times 10^4$ )       | $4.19 \times 10^4$<br>( $6.70 \times 10^3$ )       | $4.92 \times 10^3$<br>( $7.09 \times 10^2$ )       | $4.03 \times 10^2$<br>( $5.01 \times 10^1$ )       | $2.08 \times 10^1$<br>( $2.17 \times 10^0$ )        |
| $(SA)_2 \cdot (A)_1 \rightarrow (SA)_1 \cdot (A)_1 + SA$                             | $3.32 \times 10^{-2}$<br>( $1.48 \times 10^0$ )    | $1.08 \times 10^{-3}$<br>( $5.23 \times 10^{-2}$ ) | $2.07 \times 10^{-5}$<br>( $1.12 \times 10^{-3}$ ) | $2.05 \times 10^{-7}$<br>( $3.33 \times 10^{-4}$ ) | $8.64 \times 10^{-10}$<br>( $6.20 \times 10^{-8}$ ) |
| $(SA)_2 \cdot (A)_1 \rightarrow A + (SA)_2$                                          | $3.72 \times 10^0$<br>( $1.60 \times 10^1$ )       | $1.68 \times 10^{-1}$<br>( $7.31 \times 10^{-1}$ ) | $4.69 \times 10^{-3}$<br>( $2.11 \times 10^{-2}$ ) | $7.20 \times 10^{-5}$<br>( $1.25 \times 10^{-5}$ ) | $5.16 \times 10^{-7}$<br>( $2.51 \times 10^{-6}$ )  |
| $(SA)_3 \cdot (A)_1 \rightarrow (SA)_2 \cdot (A)_1 + SA$                             | $1.63 \times 10^4$<br>( $1.85 \times 10^3$ )       | $1.53 \times 10^3$<br>( $1.56 \times 10^2$ )       | $9.93 \times 10^1$<br>( $8.72 \times 10^0$ )       | $4.02 \times 10^0$<br>( $3.00 \times 10^{-1}$ )    | $4.95 \times 10^{-2}$<br>( $5.39 \times 10^{-3}$ )  |
| $(SA)_3 \cdot (A)_1 \rightarrow A + (SA)_3$                                          | $1.07 \times 10^{-1}$<br>( $3.12 \times 10^{-2}$ ) | $3.81 \times 10^{-3}$<br>( $1.09 \times 10^{-3}$ ) | $8.04 \times 10^{-5}$<br>( $2.25 \times 10^{-5}$ ) | $8.84 \times 10^{-7}$<br>( $2.37 \times 10^{-7}$ ) | $2.34 \times 10^{-9}$<br>( $1.19 \times 10^{-9}$ )  |
| $(SA)_2 \cdot (A)_2 \rightarrow (SA)_2 \cdot (A)_1 + A$                              | $2.02 \times 10^5$<br>( $1.37 \times 10^6$ )       | $2.71 \times 10^4$<br>( $2.07 \times 10^5$ )       | $2.65 \times 10^3$<br>( $2.32 \times 10^4$ )       | $1.75 \times 10^2$<br>( $1.80 \times 10^3$ )       | $7.05 \times 10^0$<br>( $8.49 \times 10^1$ )        |
| $(SA)_3 \cdot (A)_2 \rightarrow (SA)_2 \cdot (A)_2 + SA$                             | $1.61 \times 10^{-1}$<br>( $9.75 \times 10^{-2}$ ) | $6.34 \times 10^{-3}$<br>( $3.53 \times 10^{-3}$ ) | $1.51 \times 10^{-4}$<br>( $7.48 \times 10^{-5}$ ) | $1.90 \times 10^{-6}$<br>( $8.44 \times 10^{-7}$ ) | $1.06 \times 10^{-8}$<br>( $4.16 \times 10^{-9}$ )  |
| $(SA)_3 \cdot (A)_2 \rightarrow (SA)_3 \cdot (A)_1 + A$                              | $2.04 \times 10^0$<br>( $7.26 \times 10^1$ )       | $1.14 \times 10^{-1}$<br>( $4.73 \times 10^0$ )    | $4.10 \times 10^{-3}$<br>( $2.02 \times 10^{-1}$ ) | $8.43 \times 10^{-5}$<br>( $5.11 \times 10^{-3}$ ) | $1.55 \times 10^{-6}$<br>( $6.61 \times 10^{-5}$ )  |
| $(SA)_3 \cdot (A)_3 \rightarrow (SA)_3 \cdot (A)_2 + A$                              | $1.49 \times 10^2$                                 | $9.81 \times 10^0$                                 | $4.22 \times 10^{-1}$                              | $1.07 \times 10^{-2}$                              | $1.36 \times 10^{-4}$<br>( $2.93 \times 10^{-4}$ )  |
| $(SA)_1 \cdot (DSA)_1 \rightarrow SA + DSA$                                          | $6.68 \times 10^5$                                 | $8.27 \times 10^4$                                 | $7.35 \times 10^3$                                 | $4.32 \times 10^2$                                 | $1.50 \times 10^1$                                  |
| $(SA)_2 \cdot (DSA)_1 \rightarrow (SA)_1 \cdot (DSA)_1 + SA$                         | $5.71 \times 10^7$                                 | $8.04 \times 10^6$                                 | $8.34 \times 10^5$                                 | $5.91 \times 10^4$                                 | $2.57 \times 10^3$                                  |
| $(SA)_2 \cdot (DSA)_1 \rightarrow DSA + (SA)_2$                                      | $1.03 \times 10^{10}$                              | $1.58 \times 10^9$                                 | $1.81 \times 10^8$                                 | $1.43 \times 10^7$                                 | $7.11 \times 10^5$                                  |
| $(DSA)_1 \cdot (A)_1 \rightarrow DSA + A$                                            | $2.96 \times 10^{-2}$                              | $1.17 \times 10^{-3}$                              | $2.82 \times 10^{-5}$                              | $3.64 \times 10^{-7}$                              | $2.13 \times 10^{-9}$                               |
| $(SA)_1 \cdot (DSA)_1 \cdot (A)_1 \rightarrow SA + (DSA)_1 \cdot (A)_1$              | $3.67 \times 10^1$                                 | $2.48 \times 10^0$                                 | $1.10 \times 10^{-1}$                              | $2.85 \times 10^{-3}$                              | $3.77 \times 10^{-5}$                               |
| $(SA)_1 \cdot (DSA)_1 \cdot (A)_1 \rightarrow A + (SA)_1 \cdot (DSA)_1$              | $2.08 \times 10^{-6}$                              | $4.49 \times 10^{-8}$                              | $5.37 \times 10^{-10}$                             | $3.07 \times 10^{-12}$                             | $6.83 \times 10^{-15}$                              |
| $(SA)_1 \cdot (DSA)_1 \cdot (A)_1 \rightarrow DSA + (SA)_1 \cdot (A)_1$              | $3.41 \times 10^{-6}$                              | $5.83 \times 10^{-8}$                              | $5.28 \times 10^{-10}$                             | $2.17 \times 10^{-12}$                             | $3.23 \times 10^{-15}$                              |
| $(SA)_2 \cdot (DSA)_1 \cdot (A)_1 \rightarrow A + (SA)_2 \cdot (DSA)_1$              | $3.61 \times 10^{-9}$                              | $6.26 \times 10^{-11}$                             | $5.77 \times 10^{-13}$                             | $2.42 \times 10^{-15}$                             | $3.70 \times 10^{-18}$                              |
| $(SA)_2 \cdot (DSA)_1 \cdot (A)_1 \rightarrow DSA + (SA)_2 \cdot (A)_1$              | $7.26 \times 10^0$                                 | $4.28 \times 10^{-1}$                              | $1.62 \times 10^{-2}$                              | $3.49 \times 10^{-4}$                              | $3.71 \times 10^{-6}$                               |
| $(SA)_1 \cdot (DSA)_1 \cdot (A)_2 \rightarrow A + (SA)_1 \cdot (DSA)_1 \cdot (A)_1$  | $1.18 \times 10^1$                                 | $5.29 \times 10^{-1}$                              | $1.47 \times 10^{-2}$                              | $2.25 \times 10^{-4}$                              | $1.60 \times 10^{-6}$                               |
| $(SA)_2 \cdot (DSA)_1 \cdot (A)_2 \rightarrow SA + (SA)_1 \cdot (DSA)_1 \cdot (A)_2$ | $3.89 \times 10^1$                                 | $2.29 \times 10^0$                                 | $8.64 \times 10^{-2}$                              | $1.87 \times 10^{-3}$                              | $1.99 \times 10^{-5}$                               |
| $(SA)_2 \cdot (DSA)_1 \cdot (A)_2 \rightarrow A + (SA)_2 \cdot (DSA)_1 \cdot (A)_1$  | $6.55 \times 10^{-3}$                              | $1.54 \times 10^{-4}$                              | $2.02 \times 10^{-6}$                              | $1.28 \times 10^{-8}$                              | $3.24 \times 10^{-11}$                              |
| $(SA)_2 \cdot (DSA)_1 \cdot (A)_2 \rightarrow DSA + (SA)_2 \cdot (A)_2$              | $2.17 \times 10^{-7}$                              | $2.25 \times 10^{-9}$                              | $1.14 \times 10^{-11}$                             | $2.36 \times 10^{-14}$                             | $1.57 \times 10^{-17}$                              |
| $(SA)_2 \cdot (DSA)_1 \cdot (A)_3 \rightarrow A + (SA)_2 \cdot (DSA)_1 \cdot (A)_2$  | $3.08 \times 10^0$                                 | $2.14 \times 10^{-1}$                              | $9.81 \times 10^{-3}$                              | $2.68 \times 10^{-4}$                              | $3.78 \times 10^{-6}$                               |
| $(DSA)_2 \rightarrow DSA + DSA$                                                      | $3.56 \times 10^5$                                 | $4.18 \times 10^4$                                 | $3.50 \times 10^3$                                 | $1.93 \times 10^2$                                 | $6.20 \times 10^0$                                  |
| $(SA)_1 \cdot (DSA)_2 \rightarrow SA + (DSA)_2$                                      | $3.3. \times 10^6$                                 | $5.05 \times 10^5$                                 | $5.72 \times 10^4$                                 | $4.46 \times 10^3$                                 | $5.62 \times 10^1$                                  |

|                                                                                       |                        |                        |                        |                        |                        |
|---------------------------------------------------------------------------------------|------------------------|------------------------|------------------------|------------------------|------------------------|
| $(SA)_1 \cdot (DSA)_2 \rightarrow DSA + (SA)_1 \cdot (DSA)_1$                         | $1.59 \times 10^6$     | $2.31 \times 10^5$     | $2.46 \times 10^4$     | $1.80 \times 10^3$     | $2.10 \times 10^1$     |
| $(DSA)_2 \cdot (A)_1 \rightarrow A + (DSA)_2$                                         | $2.52 \times 10^{-5}$  | $5.47 \times 10^{-7}$  | $6.55 \times 10^{-9}$  | $3.73 \times 10^{-11}$ | $8.24 \times 10^{-14}$ |
| $(DSA)_2 \cdot (A)_1 \rightarrow DSA + (DSA)_1 \cdot (A)_1$                           | $2.18 \times 10^2$     | $1.40 \times 10^1$     | $5.83 \times 10^{-1}$  | $1.41 \times 10^{-2}$  | $1.72 \times 10^{-4}$  |
| $(SA)_1 \cdot (DSA)_2 \cdot (A)_1 \rightarrow SA + (DSA)_2 \cdot (A)_1$               | $2.70 \times 10^3$     | $2.24 \times 10^2$     | $1.26 \times 10^1$     | $4.32 \times 10^{-1}$  | $2.04 \times 10^{-3}$  |
| $(SA)_1 \cdot (DSA)_2 \cdot (A)_1 \rightarrow A + (SA)_1 \cdot (DSA)_2$               | $3.09 \times 10^{-8}$  | $3.64 \times 10^{-10}$ | $2.16 \times 10^{-12}$ | $5.41 \times 10^{-15}$ | $4.47 \times 10^{-18}$ |
| $(SA)_1 \cdot (DSA)_2 \cdot (A)_1 \rightarrow DSA + (SA)_1 \cdot (DSA)_1 \cdot (A)_1$ | $1.41 \times 10^4$     | $1.11 \times 10^3$     | $5.89 \times 10^1$     | $1.89 \times 10^0$     | $8.19 \times 10^{-3}$  |
| $(DSA)_2 \cdot (A)_2 \rightarrow A + (DSA)_2 \cdot (A)_1$                             | $2.13 \times 10^{-3}$  | $6.68 \times 10^{-5}$  | $1.22 \times 10^{-6}$  | $1.15 \times 10^{-8}$  | $4.57 \times 10^{-11}$ |
| $(SA)_1 \cdot (DSA)_2 \cdot (A)_2 \rightarrow SA + (DSA)_2 \cdot (A)_2$               | $1.51 \times 10^4$     | $1.25 \times 10^3$     | $7.09 \times 10^1$     | $2.45 \times 10^0$     | $4.58 \times 10^{-2}$  |
| $(SA)_1 \cdot (DSA)_2 \cdot (A)_2 \rightarrow A + (SA)_1 \cdot (DSA)_2 \cdot (A)_1$   | $2.01 \times 10^{-3}$  | $6.02 \times 10^{-5}$  | $1.05 \times 10^{-6}$  | $9.21 \times 10^{-9}$  | $3.41 \times 10^{-11}$ |
| $(SA)_1 \cdot (DSA)_2 \cdot (A)_2 \rightarrow DSA + (SA)_1 \cdot (DSA)_1 \cdot (A)_2$ | $1.17 \times 10^1$     | $6.51 \times 10^{-1}$  | $2.30 \times 10^{-2}$  | $4.60 \times 10^{-4}$  | $4.45 \times 10^{-6}$  |
| $(SA)_1 \cdot (DSA)_2 \cdot (A)_3 \rightarrow A + (SA)_1 \cdot (DSA)_2 \cdot (A)_2$   | $5.72 \times 10^{-9}$  | $8.55 \times 10^{-11}$ | $6.65 \times 10^{-13}$ | $2.28 \times 10^{-15}$ | $2.76 \times 10^{-18}$ |
| $(DSA)_3 \rightarrow (DSA)_2 + DSA$                                                   | $3.48 \times 10^9$     | $8.08 \times 10^8$     | $1.49 \times 10^8$     | $2.05 \times 10^7$     | $1.94 \times 10^6$     |
| $(DSA)_3 \cdot (A)_1 \rightarrow A + (DSA)_3$                                         | $3.97 \times 10^{-11}$ | $2.74 \times 10^{-13}$ | $8.73 \times 10^{-16}$ | $1.06 \times 10^{-18}$ | $3.78 \times 10^{-22}$ |
| $(DSA)_3 \cdot (A)_1 \rightarrow DSA + (DSA)_2 \cdot (A)_1$                           | $3.50 \times 10^3$     | $2.58 \times 10^2$     | $1.26 \times 10^1$     | $3.67 \times 10^{-1}$  | $5.59 \times 10^{-3}$  |
| $(DSA)_3 \cdot (A)_2 \rightarrow A + (DSA)_3 \cdot (A)_1$                             | $7.22 \times 10^{-5}$  | $1.94 \times 10^{-6}$  | $2.95 \times 10^{-8}$  | $2.22 \times 10^{-10}$ | $6.77 \times 10^{-13}$ |
| $(DSA)_3 \cdot (A)_2 \rightarrow DSA + (DSA)_2 \cdot (A)_2$                           | $1.78 \times 10^2$     | $1.16 \times 10^1$     | $4.90 \times 10^{-1}$  | $1.21 \times 10^{-2}$  | $1.49 \times 10^{-4}$  |
| $(DSA)_3 \cdot (A)_3 \rightarrow A + (DSA)_3 \cdot (A)_2$                             | $8.19 \times 10^{-4}$  | $2.23 \times 10^{-5}$  | $3.46 \times 10^{-7}$  | $2.67 \times 10^{-9}$  | $8.48 \times 10^{-12}$ |

---

\*The values in parentheses were taken from (Liu, J., Liu, L., Rong, H., and Zhang, X.: The potential mechanism of atmospheric new particle formation involving amino acids with multiple functional groups, Phys. Chem. Chem. Phys., 23, 10184-10195, 10.1039/D0CP06472F, 2021.)

**Table S11** Total evaporation coefficients ( $\sum\gamma, s^{-1}$ ) for each cluster in the present study

| Clusters                                 | $\sum\gamma, s^{-1}$  |                        |                        |                        |                        |
|------------------------------------------|-----------------------|------------------------|------------------------|------------------------|------------------------|
|                                          | 298.15 K              | 278.15 K               | 258.15 K               | 238.15 K               | 218.15 K               |
| SA·A                                     | $2.67 \times 10^5$    | $4.19 \times 10^4$     | $4.92 \times 10^3$     | $4.03 \times 10^2$     | $2.08 \times 10^1$     |
| SA·DSA                                   | $6.68 \times 10^5$    | $8.27 \times 10^4$     | $7.35 \times 10^3$     | $4.32 \times 10^2$     | $1.50 \times 10^1$     |
| A·DSA                                    | $2.96 \times 10^{-2}$ | $1.17 \times 10^{-3}$  | $2.82 \times 10^{-5}$  | $3.64 \times 10^{-7}$  | $2.13 \times 10^{-9}$  |
| (SA) <sub>2</sub>                        | $3.36 \times 10^3$    | $3.81 \times 10^2$     | $3.07 \times 10^1$     | $1.61 \times 10^0$     | $4.91 \times 10^{-2}$  |
| (DSA) <sub>2</sub>                       | $3.56 \times 10^5$    | $4.18 \times 10^4$     | $3.50 \times 10^3$     | $1.93 \times 10^2$     | $6.20 \times 10^0$     |
| (SA) <sub>2</sub> ·A                     | $3.75E \times 10^0$   | $1.69 \times 10^{-1}$  | $4.71 \times 10^{-3}$  | $7.22 \times 10^{-5}$  | $5.17 \times 10^{-7}$  |
| (SA) <sub>2</sub> ·(A) <sub>2</sub>      | $2.02 \times 10^5$    | $2.71 \times 10^4$     | $2.65 \times 10^3$     | $1.75 \times 10^2$     | $7.05 \times 10^0$     |
| A·(DSA) <sub>2</sub>                     | $2.18 \times 10^2$    | $1.40 \times 10^1$     | $5.83 \times 10^{-1}$  | $1.41 \times 10^{-2}$  | $1.72 \times 10^{-4}$  |
| (A) <sub>2</sub> ·(DSA) <sub>2</sub>     | $2.13 \times 10^{-3}$ | $6.68 \times 10^{-5}$  | $1.22 \times 10^{-6}$  | $1.15 \times 10^{-8}$  | $4.57 \times 10^{-11}$ |
| (SA) <sub>2</sub> ·DSA                   | $1.03 \times 10^{10}$ | $1.59 \times 10^9$     | $1.82 \times 10^8$     | $1.44 \times 10^7$     | $7.14 \times 10^5$     |
| SA·(DSA) <sub>2</sub>                    | $4.90 \times 10^6$    | $7.36 \times 10^5$     | $8.18 \times 10^4$     | $6.26 \times 10^3$     | $7.72 \times 10^1$     |
| (SA) <sub>3</sub>                        | $7.99 \times 10^5$    | $9.55 \times 10^4$     | $8.20 \times 10^3$     | $4.64 \times 10^2$     | $1.54 \times 10^1$     |
| (DSA) <sub>3</sub>                       | $3.48 \times 10^9$    | $8.08 \times 10^8$     | $1.49 \times 10^8$     | $2.05 \times 10^7$     | $1.94 \times 10^6$     |
| (SA) <sub>3</sub> ·A                     | $1.63 \times 10^4$    | $1.53 \times 10^3$     | $9.93 \times 10^1$     | $4.02 \times 10^0$     | $4.95 \times 10^{-2}$  |
| (SA) <sub>3</sub> ·(A) <sub>2</sub>      | $2.20 \times 10^0$    | $1.21 \times 10^{-1}$  | $4.25 \times 10^{-3}$  | $8.62 \times 10^{-5}$  | $1.56 \times 10^{-6}$  |
| (SA) <sub>3</sub> ·(A) <sub>3</sub>      | $1.49 \times 10^2$    | $9.81 \times 10^0$     | $4.22 \times 10^{-1}$  | $1.07 \times 10^{-2}$  | $1.36 \times 10^{-4}$  |
| A·(DSA) <sub>3</sub>                     | $3.50 \times 10^3$    | $2.58 \times 10^2$     | $1.26 \times 10^1$     | $3.67 \times 10^{-1}$  | $5.59 \times 10^{-3}$  |
| (A) <sub>2</sub> ·(DSA) <sub>3</sub>     | $1.45 \times 10^3$    | $9.80 \times 10^1$     | $4.28 \times 10^0$     | $1.08 \times 10^{-1}$  | $1.41 \times 10^{-3}$  |
| (A) <sub>3</sub> ·(DSA) <sub>3</sub>     | $2.70 \times 10^{-3}$ | $7.59 \times 10^{-5}$  | $1.22 \times 10^{-6}$  | $9.82 \times 10^{-9}$  | $3.24 \times 10^{-11}$ |
| SA·A·DSA                                 | $3.67 \times 10^1$    | $2.48 \times 10^0$     | $1.10 \times 10^{-1}$  | $2.85 \times 10^{-3}$  | $3.77 \times 10^{-5}$  |
| SA·(A) <sub>2</sub> ·DSA                 | $1.18 \times 10^1$    | $5.29 \times 10^{-1}$  | $1.47 \times 10^{-2}$  | $2.25 \times 10^{-4}$  | $1.60 \times 10^{-6}$  |
| SA <sub>2</sub> ·A·DSA                   | $7.84 \times 10^4$    | $8.84 \times 10^3$     | $7.06 \times 10^2$     | $3.67 \times 10^1$     | $1.10 \times 10^0$     |
| (SA) <sub>2</sub> ·(A) <sub>2</sub> ·DSA | $3.89 \times 10^1$    | $2.29 \times 10^0$     | $8.64 \times 10^{-2}$  | $1.87 \times 10^{-3}$  | $1.99 \times 10^{-5}$  |
| (SA) <sub>2</sub> ·(A) <sub>3</sub> ·DSA | $4.23 \times 10^8$    | $1.27 \times 10^8$     | $3.16 \times 10^7$     | $6.14 \times 10^6$     | $8.75 \times 10^5$     |
| SA·A·(DSA) <sub>2</sub>                  | $1.68 \times 10^4$    | $1.34 \times 10^3$     | $7.14 \times 10^1$     | $2.32 \times 10^0$     | $1.02 \times 10^{-2}$  |
| SA·(A) <sub>2</sub> ·(DSA) <sub>2</sub>  | $1.51 \times 10^4$    | $1.26 \times 10^3$     | $7.09 \times 10^1$     | $2.46 \times 10^0$     | $4.58 \times 10^{-2}$  |
| SA·(A) <sub>3</sub> ·(DSA) <sub>2</sub>  | $5.72 \times 10^{-9}$ | $8.55 \times 10^{-11}$ | $6.65 \times 10^{-13}$ | $2.28 \times 10^{-15}$ | $2.76 \times 10^{-18}$ |



**Table S12** The generated enhancement strength  $R$  of DSA at the conditions of  $T = 218.15$  K,  $[\text{SA}] = 10^6 - 10^8 \text{ molecules}\cdot\text{cm}^{-3}$ ,  $[\text{A}] = 10^7 - 10^{11} \text{ molecules}\cdot\text{cm}^{-3}$ , and  $[\text{DSA}] = 10^1 - 10^3 \text{ molecules}\cdot\text{cm}^{-3}$

| [SA]          | [A]             | [DSA] = $10^1$     | [DSA] = $10^2$     | [DSA] = $10^3$     |
|---------------|-----------------|--------------------|--------------------|--------------------|
| [SA] = $10^6$ | [A] = $10^7$    | $1.00 \times 10^0$ | $1.00 \times 10^0$ | $1.00 \times 10^0$ |
| [SA] = $10^6$ | [A] = $10^8$    | $1.00 \times 10^0$ | $1.00 \times 10^0$ | $1.00 \times 10^0$ |
| [SA] = $10^6$ | [A] = $10^9$    | $1.00 \times 10^0$ | $1.00 \times 10^0$ | $1.00 \times 10^0$ |
| [SA] = $10^6$ | [A] = $10^{10}$ | $1.00 \times 10^0$ | $1.00 \times 10^0$ | $1.16 \times 10^0$ |
| [SA] = $10^6$ | [A] = $10^{11}$ | $1.00 \times 10^0$ | $1.03 \times 10^0$ | $2.48 \times 10^1$ |
| [SA] = $10^7$ | [A] = $10^7$    | $1.00 \times 10^0$ | $1.00 \times 10^0$ | $1.00 \times 10^0$ |
| [SA] = $10^7$ | [A] = $10^8$    | $1.00 \times 10^0$ | $1.00 \times 10^0$ | $1.00 \times 10^0$ |
| [SA] = $10^7$ | [A] = $10^9$    | $1.00 \times 10^0$ | $1.00 \times 10^0$ | $1.00 \times 10^0$ |
| [SA] = $10^7$ | [A] = $10^{10}$ | $1.00 \times 10^0$ | $1.00 \times 10^0$ | $1.00 \times 10^0$ |
| [SA] = $10^7$ | [A] = $10^{11}$ | $1.00 \times 10^0$ | $1.01 \times 10^0$ | $1.01 \times 10^0$ |
| [SA] = $10^8$ | [A] = $10^7$    | $1.00 \times 10^0$ | $1.00 \times 10^0$ | $1.00 \times 10^0$ |
| [SA] = $10^8$ | [A] = $10^8$    | $1.00 \times 10^0$ | $1.00 \times 10^0$ | $1.00 \times 10^0$ |
| [SA] = $10^8$ | [A] = $10^9$    | $1.00 \times 10^0$ | $1.00 \times 10^0$ | $1.00 \times 10^0$ |
| [SA] = $10^8$ | [A] = $10^{10}$ | $1.00 \times 10^0$ | $1.00 \times 10^0$ | $1.00 \times 10^0$ |
| [SA] = $10^8$ | [A] = $10^{11}$ | $1.00 \times 10^0$ | $1.00 \times 10^0$ | $1.00 \times 10^0$ |

**Table S13** The generated enhancement strength  $R$  of DSA at the conditions of  $T = 238.15$  K,  $[SA] = 10^6$ - $10^8$  molecules $\cdot$ cm $^{-3}$ ,  $[A] = 10^7$ - $10^{11}$  molecules $\cdot$ cm $^{-3}$ , and  $[DSA] = 10^1$ - $10^3$  molecules $\cdot$ cm $^{-3}$

| [SA]          | [A]             | [DSA] = $10^1$     | [DSA] = $10^2$     | [DSA] = $10^3$     |
|---------------|-----------------|--------------------|--------------------|--------------------|
| [SA] = $10^6$ | [A] = $10^7$    | $1.00 \times 10^0$ | $1.00 \times 10^0$ | $1.03 \times 10^0$ |
| [SA] = $10^6$ | [A] = $10^8$    | $1.00 \times 10^0$ | $1.00 \times 10^0$ | $1.03 \times 10^0$ |
| [SA] = $10^6$ | [A] = $10^9$    | $1.00 \times 10^0$ | $1.00 \times 10^0$ | $1.07 \times 10^0$ |
| [SA] = $10^6$ | [A] = $10^{10}$ | $1.00 \times 10^0$ | $1.00 \times 10^0$ | $2.31 \times 10^0$ |
| [SA] = $10^6$ | [A] = $10^{11}$ | $1.00 \times 10^0$ | $1.26 \times 10^0$ | $1.91 \times 10^2$ |
| [SA] = $10^7$ | [A] = $10^7$    | $1.00 \times 10^0$ | $1.00 \times 10^0$ | $1.02 \times 10^0$ |
| [SA] = $10^7$ | [A] = $10^8$    | $1.00 \times 10^0$ | $1.00 \times 10^0$ | $1.02 \times 10^0$ |
| [SA] = $10^7$ | [A] = $10^9$    | $1.00 \times 10^0$ | $1.00 \times 10^0$ | $1.02 \times 10^0$ |
| [SA] = $10^7$ | [A] = $10^{10}$ | $1.00 \times 10^0$ | $1.00 \times 10^0$ | $1.02 \times 10^0$ |
| [SA] = $10^7$ | [A] = $10^{11}$ | $1.00 \times 10^0$ | $1.00 \times 10^0$ | $1.17 \times 10^0$ |
| [SA] = $10^8$ | [A] = $10^7$    | $1.00 \times 10^0$ | $1.00 \times 10^0$ | $1.00 \times 10^0$ |
| [SA] = $10^8$ | [A] = $10^8$    | $1.00 \times 10^0$ | $1.00 \times 10^0$ | $1.00 \times 10^0$ |
| [SA] = $10^8$ | [A] = $10^9$    | $1.00 \times 10^0$ | $1.00 \times 10^0$ | $1.00 \times 10^0$ |
| [SA] = $10^8$ | [A] = $10^{10}$ | $1.00 \times 10^0$ | $1.00 \times 10^0$ | $1.00 \times 10^0$ |
| [SA] = $10^8$ | [A] = $10^{11}$ | $1.00 \times 10^0$ | $1.00 \times 10^0$ | $1.00 \times 10^0$ |

**Table S14** The generated enhancement strength  $R$  of DSA at the conditions of  $T = 258.15$  K,  $[\text{SA}] = 10^6$ - $10^8$  molecules $\cdot\text{cm}^{-3}$ ,  $[\text{A}] = 10^7$ - $10^{11}$  molecules $\cdot\text{cm}^{-3}$ , and  $[\text{DSA}] = 10^1$ - $10^3$  molecules $\cdot\text{cm}^{-3}$ .

| [SA]          | [A]             | [DSA] = $10^1$     | [DSA] = $10^2$     | [DSA] = $10^3$     |
|---------------|-----------------|--------------------|--------------------|--------------------|
| [SA] = $10^6$ | [A] = $10^7$    | $1.00 \times 10^0$ | $1.02 \times 10^0$ | $1.93 \times 10^1$ |
| [SA] = $10^6$ | [A] = $10^8$    | $1.00 \times 10^0$ | $1.02 \times 10^0$ | $2.12 \times 10^1$ |
| [SA] = $10^6$ | [A] = $10^9$    | $1.00 \times 10^0$ | $1.06 \times 10^0$ | $4.14 \times 10^1$ |
| [SA] = $10^6$ | [A] = $10^{10}$ | $1.00 \times 10^0$ | $1.33 \times 10^0$ | $2.75 \times 10^2$ |
| [SA] = $10^6$ | [A] = $10^{11}$ | $1.00 \times 10^0$ | $5.56 \times 10^0$ | $3.29 \times 10^3$ |
| [SA] = $10^7$ | [A] = $10^7$    | $1.00 \times 10^0$ | $1.00 \times 10^0$ | $1.03 \times 10^0$ |
| [SA] = $10^7$ | [A] = $10^8$    | $1.00 \times 10^0$ | $1.00 \times 10^0$ | $1.05 \times 10^0$ |
| [SA] = $10^7$ | [A] = $10^9$    | $1.00 \times 10^0$ | $1.02 \times 10^0$ | $1.18 \times 10^0$ |
| [SA] = $10^7$ | [A] = $10^{10}$ | $1.00 \times 10^0$ | $1.04 \times 10^0$ | $1.57 \times 10^0$ |
| [SA] = $10^7$ | [A] = $10^{11}$ | $1.00 \times 10^0$ | $1.05 \times 10^0$ | $3.84 \times 10^0$ |
| [SA] = $10^8$ | [A] = $10^7$    | $1.00 \times 10^0$ | $1.00 \times 10^0$ | $1.01 \times 10^0$ |
| [SA] = $10^8$ | [A] = $10^8$    | $1.00 \times 10^0$ | $1.00 \times 10^0$ | $1.01 \times 10^0$ |
| [SA] = $10^8$ | [A] = $10^9$    | $1.00 \times 10^0$ | $1.00 \times 10^0$ | $1.05 \times 10^0$ |
| [SA] = $10^8$ | [A] = $10^{10}$ | $1.00 \times 10^0$ | $1.01 \times 10^0$ | $1.06 \times 10^0$ |
| [SA] = $10^8$ | [A] = $10^{11}$ | $1.00 \times 10^0$ | $1.00 \times 10^0$ | $1.04 \times 10^0$ |

**Table S15** The generated enhancement strength  $R$  of DSA at the conditions of  $T = 278.15$  K,  $[\text{SA}] = 10^6 - 10^8$  molecules $\cdot\text{cm}^{-3}$ ,  $[\text{A}] = 10^7 - 10^{11}$  molecules $\cdot\text{cm}^{-3}$ , and  $[\text{DSA}] = 10^1 - 10^3$  molecules $\cdot\text{cm}^{-3}$ .

| [SA]   | [A]       | [DSA] = $10^1$     | [DSA] = $10^2$     | [DSA] = $10^3$     |
|--------|-----------|--------------------|--------------------|--------------------|
| $10^6$ | $10^7$    | $8.90 \times 10^0$ | $7.90 \times 10^3$ | $7.90 \times 10^6$ |
| $10^6$ | $10^8$    | $8.90 \times 10^0$ | $7.91 \times 10^3$ | $7.90 \times 10^6$ |
| $10^6$ | $10^9$    | $8.93 \times 10^0$ | $7.93 \times 10^3$ | $7.91 \times 10^6$ |
| $10^6$ | $10^{10}$ | $9.18 \times 10^0$ | $8.16 \times 10^3$ | $7.96 \times 10^6$ |
| $10^6$ | $10^{11}$ | $1.17 \times 10^1$ | $1.05 \times 10^4$ | $8.34 \times 10^6$ |
| $10^7$ | $10^7$    | $1.01 \times 10^0$ | $6.92 \times 10^0$ | $5.92 \times 10^3$ |
| $10^7$ | $10^8$    | $1.01 \times 10^0$ | $6.93 \times 10^0$ | $5.92 \times 10^3$ |
| $10^7$ | $10^9$    | $1.01 \times 10^0$ | $6.95 \times 10^0$ | $5.93 \times 10^3$ |
| $10^7$ | $10^{10}$ | $1.01 \times 10^0$ | $7.16 \times 10^0$ | $6.01 \times 10^3$ |
| $10^7$ | $10^{11}$ | $1.01 \times 10^0$ | $9.34 \times 10^0$ | $6.59 \times 10^3$ |
| $10^8$ | $10^7$    | $1.00 \times 10^0$ | $1.00 \times 10^0$ | $2.54 \times 10^0$ |
| $10^8$ | $10^8$    | $1.00 \times 10^0$ | $1.00 \times 10^0$ | $2.54 \times 10^0$ |
| $10^8$ | $10^9$    | $1.00 \times 10^0$ | $1.00 \times 10^0$ | $2.56 \times 10^0$ |
| $10^8$ | $10^{10}$ | $1.00 \times 10^0$ | $1.01 \times 10^0$ | $2.70 \times 10^0$ |
| $10^8$ | $10^{11}$ | $1.00 \times 10^0$ | $1.05 \times 10^0$ | $4.26 \times 10^0$ |

**Table S16** The generated enhancement strength  $R$  of DSA at the conditions of  $T = 298.15$  K,  $[\text{SA}] = 10^6 - 10^8$  molecules $\cdot\text{cm}^{-3}$ ,  $[\text{A}] = 10^7 - 10^{11}$  molecules $\cdot\text{cm}^{-3}$ , and  $[\text{DSA}] = 10^1 - 10^3$  molecules $\cdot\text{cm}^{-3}$ .

| [SA]                 | [A]                    | [DSA] = $10^1$     | [DSA] = $10^2$     | [DSA] = $10^3$        |
|----------------------|------------------------|--------------------|--------------------|-----------------------|
| $[\text{SA}] = 10^6$ | $[\text{A}] = 10^7$    | $2.01 \times 10^4$ | $2.01 \times 10^7$ | $2.00 \times 10^{10}$ |
| $[\text{SA}] = 10^6$ | $[\text{A}] = 10^8$    | $2.01 \times 10^4$ | $2.01 \times 10^7$ | $2.01 \times 10^{10}$ |
| $[\text{SA}] = 10^6$ | $[\text{A}] = 10^9$    | $2.01 \times 10^4$ | $2.01 \times 10^7$ | $2.01 \times 10^{10}$ |
| $[\text{SA}] = 10^6$ | $[\text{A}] = 10^{10}$ | $2.01 \times 10^4$ | $2.01 \times 10^7$ | $2.01 \times 10^{10}$ |
| $[\text{SA}] = 10^6$ | $[\text{A}] = 10^{11}$ | $2.07 \times 10^4$ | $2.06 \times 10^7$ | $2.03 \times 10^{10}$ |
| $[\text{SA}] = 10^7$ | $[\text{A}] = 10^7$    | $1.65 \times 10^1$ | $1.55 \times 10^4$ | $1.55 \times 10^7$    |
| $[\text{SA}] = 10^7$ | $[\text{A}] = 10^8$    | $1.65 \times 10^1$ | $1.55 \times 10^4$ | $1.55 \times 10^7$    |
| $[\text{SA}] = 10^7$ | $[\text{A}] = 10^9$    | $1.65 \times 10^1$ | $1.55 \times 10^4$ | $1.55 \times 10^7$    |
| $[\text{SA}] = 10^7$ | $[\text{A}] = 10^{10}$ | $1.66 \times 10^1$ | $1.56 \times 10^4$ | $1.55 \times 10^7$    |
| $[\text{SA}] = 10^7$ | $[\text{A}] = 10^{11}$ | $1.70 \times 10^1$ | $1.59 \times 10^4$ | $1.57 \times 10^7$    |
| $[\text{SA}] = 10^8$ | $[\text{A}] = 10^7$    | $1.00 \times 10^0$ | $5.73 \times 10^0$ | $4.73 \times 10^3$    |
| $[\text{SA}] = 10^8$ | $[\text{A}] = 10^8$    | $1.00 \times 10^0$ | $5.73 \times 10^0$ | $4.73 \times 10^3$    |
| $[\text{SA}] = 10^8$ | $[\text{A}] = 10^9$    | $1.00 \times 10^0$ | $5.73 \times 10^0$ | $4.73 \times 10^3$    |
| $[\text{SA}] = 10^8$ | $[\text{A}] = 10^{10}$ | $1.00 \times 10^0$ | $5.74 \times 10^0$ | $4.73 \times 10^3$    |
| $[\text{SA}] = 10^8$ | $[\text{A}] = 10^{11}$ | $1.00 \times 10^0$ | $5.85 \times 10^0$ | $4.76 \times 10^3$    |

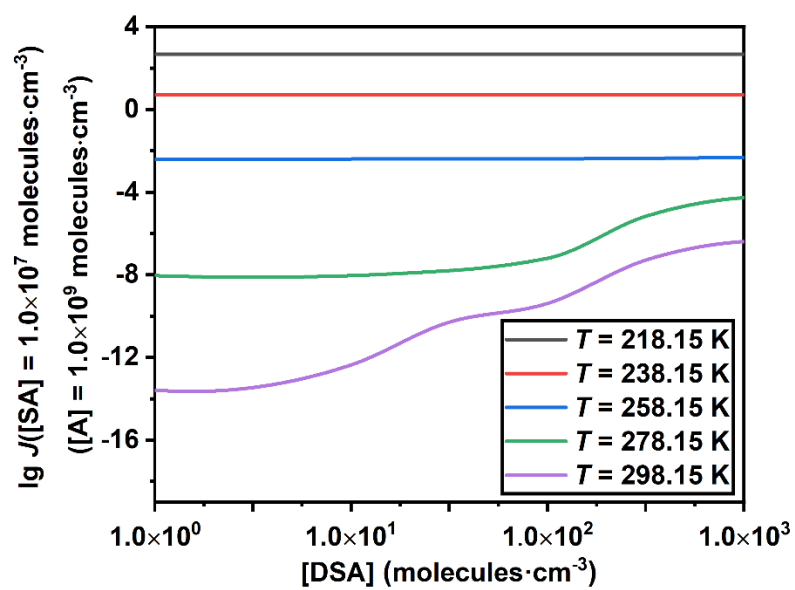

**Fig. S11** The logarithms of the formation rate of DSA ( $\lg J$ ) as a function of  $[DSA]$  from  $10^0$  to  $10^3$  molecules·cm<sup>-3</sup> under different temperatures (218.15, 238.15, 258.15, 278.15 and 298.15 K) where  $[SA] = 10^7$  molecules·cm<sup>-3</sup> and  $[A] = 10^9$  molecules·cm<sup>-3</sup>.

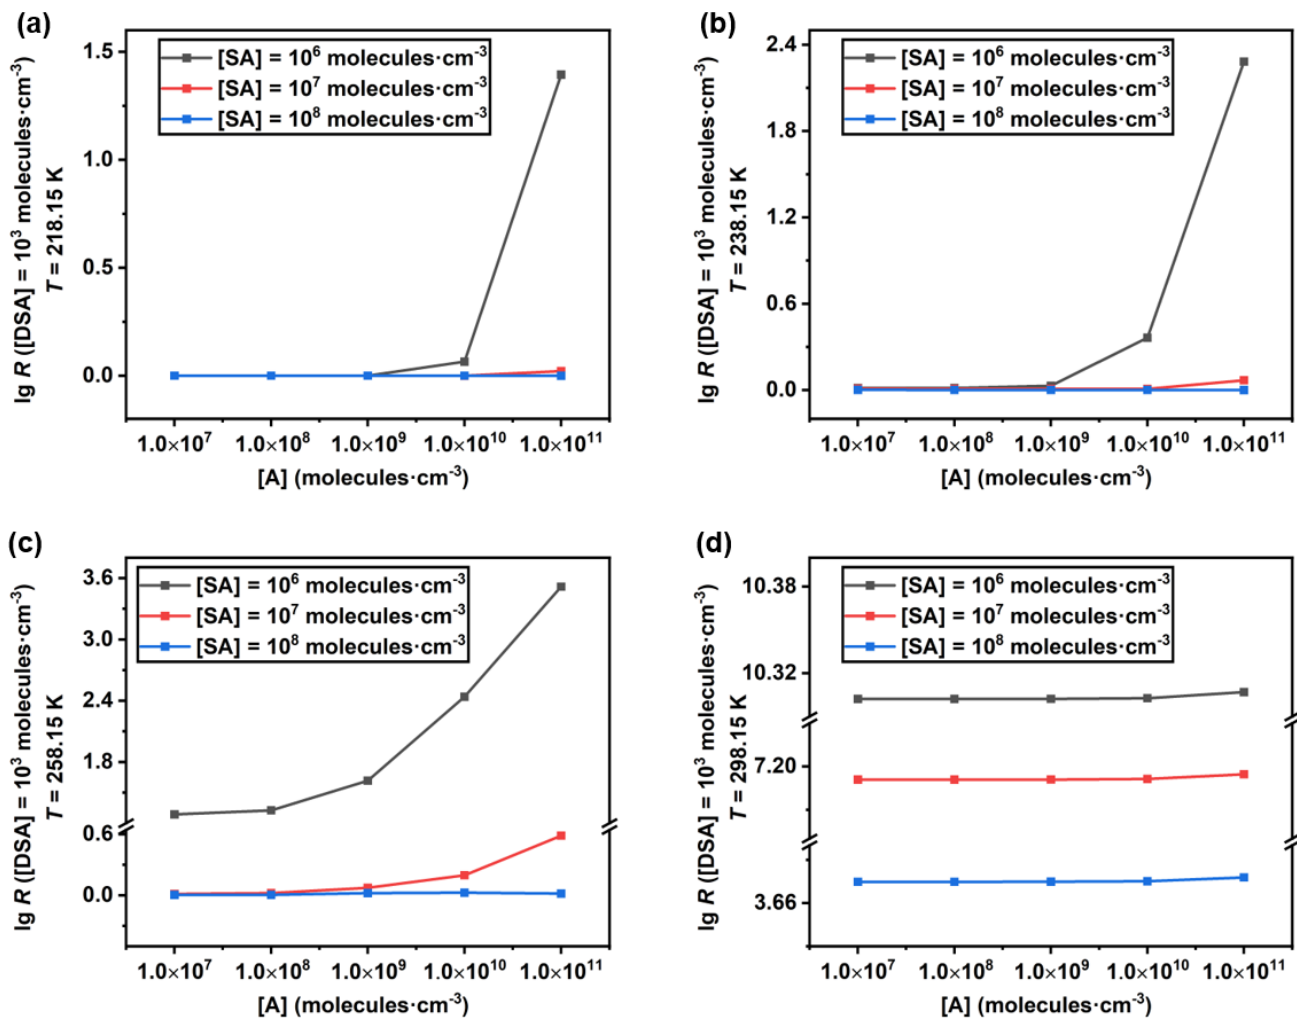

**Fig. S12** The logarithms of the enhancement strength of DSA ( $\lg R$ ) as a function of  $[A]$  from  $10^7$  to  $10^{11}$  molecules  $\text{cm}^{-3}$  and  $[DSA] = 10^3$  molecules  $\text{cm}^{-3}$  under different  $[SA] = 10^6 \sim 10^8$  molecules  $\text{cm}^{-3}$   $T =$  (a) 218.15 K, (b) 238.15 K, (c) 258.15 K and (d) 298.15 K.

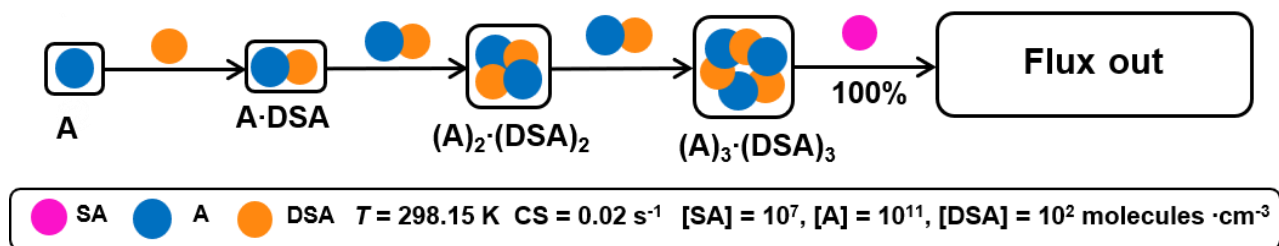

**Fig. S13** The main pathways of clusters growing out of the research system under the conditions where  $T = 298.15 \text{ K}$ ,  $[SA] = 10^7 \text{ molecules} \cdot \text{cm}^{-3}$ ,  $[A] = 10^{11} \text{ molecules} \cdot \text{cm}^{-3}$ , and  $[DSA] = 10^3 \text{ molecules} \cdot \text{cm}^{-3}$ .



**Table S17.** Cartesian coordinates of all molecules and clusters in the studied system.**SA:**

| Atoms | X           | Y           | Z           |
|-------|-------------|-------------|-------------|
| S     | -0.00000100 | -0.00000100 | -0.15756700 |
| O     | 0.67306500  | 0.67306500  | -0.81983600 |
| O     | -0.67307500 | -0.67307500 | -0.81979800 |
| O     | 1.01736800  | 1.01736800  | 0.84358200  |
| O     | -1.01735800 | -1.01735800 | 0.84357500  |
| H     | 1.70169100  | 1.70169100  | 1.07043800  |
| H     | -1.70167800 | -1.70167800 | 1.07045700  |

**A:**

| Atoms | X           | Y           | Z           |
|-------|-------------|-------------|-------------|
| N     | 0.00000000  | 0.11911400  | 0.00000000  |
| H     | -0.93235000 | -0.27807200 | 0.00000000  |
| H     | 0.46617500  | -0.27786300 | 0.80753900  |
| H     | 0.46617500  | -0.27786300 | -0.80753900 |

**DSA:**

| Atoms | X           | Y           | Z           |
|-------|-------------|-------------|-------------|
| S     | -1.43510900 | -0.13598100 | 0.03492700  |
| O     | -2.38705700 | -0.43102000 | 1.02932100  |
| O     | -1.24778700 | -0.89230600 | -1.14721200 |
| O     | -1.54051800 | 1.38764200  | -0.28976900 |
| S     | 1.38684600  | 0.12449200  | 0.06491400  |
| O     | 1.11188700  | 1.05840000  | -0.97277300 |
| O     | 1.64540800  | -1.25084900 | -0.64070300 |
| O     | 2.34997600  | 0.33819800  | 1.07741600  |
| O     | 0.01087600  | -0.15789900 | 0.86275800  |
| H     | -0.84560200 | 1.61939600  | -0.93204600 |
| H     | 2.07552800  | -1.85290200 | -0.01771400 |

**(SA)<sub>1</sub>·(A)<sub>1</sub>:**

| Atoms | X           | Y           | Z           |
|-------|-------------|-------------|-------------|
| S     | -0.59732600 | -0.11330300 | 0.09028200  |
| O     | 0.11386900  | -0.09250800 | 1.33053100  |
| O     | -1.77725300 | -0.88882800 | -0.09102500 |
| O     | 0.38323700  | -0.42810500 | -1.05987100 |
| O     | -0.97903500 | 1.41306500  | -0.18279600 |
| H     | 1.35885500  | -0.23109000 | -0.73760300 |
| H     | -1.72492000 | 1.42300400  | -0.79399800 |
| N     | 2.71575100  | 0.04051200  | -0.05360200 |
| H     | 3.15679600  | 0.92252300  | -0.28222700 |

|   |            |             |             |
|---|------------|-------------|-------------|
| H | 3.40929600 | -0.69086300 | -0.14794300 |
| H | 2.42039100 | 0.07670700  | 0.91776700  |

**(SA)<sub>1</sub>·(DSA)<sub>1</sub>:**

| Atoms | X           | Y           | Z           |
|-------|-------------|-------------|-------------|
| S     | -2.47894500 | -0.27718400 | -0.07642800 |
| O     | -1.96942000 | -0.69986700 | 1.32142600  |
| O     | -3.71936500 | -0.91541600 | -0.30294600 |
| O     | -1.39496600 | -0.39448700 | -1.03015800 |
| O     | -2.68689900 | 1.27963100  | 0.02947600  |
| H     | 0.13413900  | -1.35148000 | -1.27363600 |
| H     | -3.55012600 | 1.46532400  | 0.42365200  |
| S     | 1.71348900  | -1.27742400 | 0.10594200  |
| O     | 2.93138800  | -1.97706900 | 0.17828500  |
| O     | 1.10381000  | -1.47119600 | -1.31475600 |
| O     | 0.67953600  | -1.42141800 | 1.07950900  |
| S     | 1.13845700  | 1.55591000  | 0.08489700  |
| O     | 0.10562700  | 1.27156800  | 1.02340900  |
| O     | 0.55626500  | 1.50979600  | -1.35863100 |
| O     | 1.99771500  | 2.66524800  | 0.18881000  |
| O     | 2.17216200  | 0.28353900  | 0.05759200  |
| H     | -0.99604700 | -0.58635500 | 1.38700300  |
| H     | -0.27344600 | 0.98808800  | -1.36114300 |

**(SA)<sub>1</sub>·(DSA)<sub>1</sub>·(A)<sub>1</sub>:**

| Atoms | X           | Y           | Z           |
|-------|-------------|-------------|-------------|
| N     | 0.13203900  | -0.69865100 | 2.57081600  |
| H     | -0.09820600 | 0.24085300  | 2.88663600  |
| H     | 0.94687800  | -0.61472500 | 1.91851700  |
| H     | 0.36650600  | -1.29661600 | 3.35702000  |
| S     | -1.36558700 | -1.43866900 | -0.41236900 |
| O     | -1.93814100 | -2.27300500 | -1.40003200 |
| O     | -2.05721700 | -1.34463300 | 0.88102700  |
| O     | 0.07046500  | -1.46827700 | -0.22323000 |
| S     | -1.64689100 | 1.38540600  | -0.13002500 |
| O     | -0.51624200 | 1.25992200  | 0.76902000  |
| O     | -2.95619100 | 1.18333900  | 0.69692800  |
| O     | -1.78524200 | 2.53966300  | -0.92557400 |
| O     | -1.64573200 | 0.12543300  | -1.08303700 |
| H     | -0.67833000 | -1.06704400 | 2.04175900  |
| H     | -2.98291100 | 0.24564200  | 0.98396400  |
| S     | 2.84196800  | 0.16905200  | -0.13063300 |
| O     | 4.17836600  | 0.57355300  | -0.33440900 |
| O     | 2.40700700  | -0.23359000 | 1.19157800  |

|   |            |             |             |
|---|------------|-------------|-------------|
| O | 2.54895000 | -0.98628800 | -1.13465400 |
| O | 1.88912300 | 1.31567200  | -0.60376200 |
| H | 1.63256100 | -1.30885000 | -0.99865200 |
| H | 1.05622000 | 1.30436200  | -0.08737600 |

**(SA)<sub>1</sub>·(DSA)<sub>1</sub>·(A)<sub>2</sub>:**

| Atoms | X           | Y           | Z           |
|-------|-------------|-------------|-------------|
| N     | 0.18558600  | -0.42777500 | 2.69341100  |
| H     | 0.42446900  | 0.41891100  | 2.13776300  |
| H     | 0.22002000  | -0.23493600 | 3.68889300  |
| H     | -0.77044100 | -0.65607300 | 2.38916300  |
| S     | 1.50115100  | -1.38977600 | -0.01360500 |
| O     | 1.96564300  | -1.72651000 | -1.33444200 |
| O     | 0.06199800  | -1.08823200 | 0.00995300  |
| O     | 1.91464000  | -2.21104900 | 1.09420700  |
| S     | 1.56569400  | 1.50356200  | -0.05508300 |
| O     | 0.35142500  | 1.60111000  | 0.79620900  |
| O     | 1.20883500  | 1.38127000  | -1.45768000 |
| O     | 2.59905500  | 2.41327900  | 0.28396600  |
| O     | 2.20419300  | 0.04782600  | 0.39472500  |
| H     | 0.83092700  | -1.18798700 | 2.43214500  |
| H     | 0.21262400  | 0.35027500  | -2.19677800 |
| N     | -0.21950900 | -0.47968000 | -2.68577800 |
| H     | 0.42816900  | -1.25280800 | -2.47932300 |
| H     | -1.13410900 | -0.66252500 | -2.26849900 |
| H     | -0.29905600 | -0.31804400 | -3.68415100 |
| S     | -2.73864200 | 0.13718200  | 0.13240900  |
| O     | -2.33692000 | -0.04611600 | 1.50407700  |
| O     | -4.06757200 | 0.49138800  | -0.19509100 |
| O     | -2.44593300 | -1.22129500 | -0.64152200 |
| O     | -1.75846000 | 1.12418900  | -0.55316500 |
| H     | -1.57732400 | -1.54280100 | -0.31762000 |
| H     | -0.92428500 | 1.29579400  | 0.01554000  |

**(SA)<sub>1</sub>·(DSA)<sub>2</sub>:**

| Atoms | X           | Y           | Z           |
|-------|-------------|-------------|-------------|
| S     | -0.13767500 | -0.19715200 | 0.54525800  |
| O     | -0.42207900 | -0.86585500 | -0.82014700 |
| O     | 1.04200900  | -0.83307100 | 1.05116300  |
| O     | -1.32800500 | -0.19667000 | 1.36133700  |
| O     | 0.13514300  | 1.29151800  | 0.24366200  |
| H     | -2.91156200 | -1.13032000 | 1.55389200  |
| H     | 1.03801800  | 1.39817800  | -0.15275000 |
| S     | -4.24938800 | -1.33970400 | -0.04918500 |
| O     | -5.44989800 | -2.06032700 | -0.17755700 |

|   |             |             |             |
|---|-------------|-------------|-------------|
| O | -3.87733800 | -1.24265900 | 1.46229700  |
| O | -3.07393000 | -1.64456800 | -0.79753900 |
| S | -3.65868400 | 1.46022300  | -0.45922500 |
| O | -2.48142200 | 1.03228800  | -1.14047400 |
| O | -3.32838200 | 1.69077400  | 1.04492400  |
| O | -4.47160300 | 2.51468100  | -0.91136100 |
| O | -4.69233600 | 0.19551500  | -0.37449900 |
| H | -1.35522900 | -0.72140200 | -1.09153900 |
| H | -2.50681500 | 1.21314800  | 1.27796200  |
| S | 3.72256900  | 1.38395500  | 0.20360800  |
| O | 3.64169600  | 2.20232700  | 1.34451500  |
| O | 2.62269000  | 1.26632800  | -0.71430700 |
| O | 5.01531700  | 1.72818200  | -0.57990200 |
| S | 4.25886000  | -1.36865400 | -0.29821200 |
| O | 4.98229300  | -0.86284300 | -1.41906500 |
| O | 2.81420000  | -1.62226000 | -0.77565200 |
| O | 4.75478800  | -2.39492500 | 0.52939100  |
| O | 4.04465200  | -0.10690900 | 0.75229600  |
| H | 5.18141100  | 1.04151100  | -1.25808700 |
| H | 2.16089400  | -1.55201000 | -0.03802000 |

**(SA)<sub>1</sub>·(DSA)<sub>2</sub>·(A)<sub>1</sub>:**

| Atoms | X           | Y           | Z           |
|-------|-------------|-------------|-------------|
| N     | -1.03477100 | -1.42131200 | 2.23680900  |
| H     | -1.12479800 | -1.61683800 | 3.22835100  |
| H     | -1.02403900 | -0.40937600 | 2.05950300  |
| H     | -0.13593600 | -1.76980700 | 1.87236500  |
| S     | -2.19075800 | -1.64299100 | -0.90140900 |
| O     | -2.28576800 | -2.33434400 | -2.13022700 |
| O     | -2.92530400 | -2.18564200 | 0.24468400  |
| O     | -0.88408400 | -1.14090100 | -0.49689600 |
| S     | -3.68951300 | 0.63285700  | -0.05946400 |
| O     | -2.70238300 | 0.72145300  | 0.99671100  |
| O     | -4.85219400 | -0.29167500 | 0.41526500  |
| O     | -4.23884800 | 1.81821000  | -0.58951400 |
| O     | -3.05939400 | -0.19546700 | -1.24856300 |
| H     | -1.80709100 | -1.83095200 | 1.69067400  |
| H     | -4.48747100 | -1.19327100 | 0.53514400  |
| S     | 0.15228100  | 1.95387800  | 0.53584900  |
| O     | 1.27606900  | 2.82182300  | 0.32007600  |
| O     | 0.26759000  | 0.92056200  | 1.52846900  |
| O     | -0.25845800 | 1.33727700  | -0.81415400 |
| O     | -1.02023000 | 2.91465900  | 0.88504600  |
| H     | -0.46549600 | 0.35646300  | -0.72440200 |
| H     | -1.82682100 | 2.37519200  | 1.01264400  |

|   |            |             |             |
|---|------------|-------------|-------------|
| S | 2.70599300 | -1.36719900 | 0.84693600  |
| O | 1.53748600 | -2.07068700 | 1.25335000  |
| O | 3.48880900 | -0.61750600 | 1.75521000  |
| O | 3.56491500 | -2.40057400 | 0.05893500  |
| S | 3.31947100 | 0.57499500  | -1.12424400 |
| O | 4.51717300 | -0.19412300 | -1.22251200 |
| O | 3.56072300 | 1.67250700  | -0.08237600 |
| O | 2.60229600 | 1.03068700  | -2.24998800 |
| O | 2.20362900 | -0.38844900 | -0.34690900 |
| H | 4.30165600 | -1.92828500 | -0.37622400 |
| H | 2.71759900 | 2.19893600  | 0.06872900  |

**(SA)<sub>1</sub>·(DSA)<sub>2</sub>·(A)<sub>2</sub>:**

| Atoms | X           | Y           | Z           |
|-------|-------------|-------------|-------------|
| N     | 2.39985100  | -2.97995600 | 0.60863900  |
| H     | 2.17249700  | -2.21230000 | 1.25885300  |
| H     | 2.57937300  | -3.84211400 | 1.11296400  |
| H     | 1.60459000  | -3.08625700 | -0.04273300 |
| S     | 3.31532100  | -0.21618600 | -0.95088900 |
| O     | 3.58748000  | 0.62663000  | -2.08297800 |
| O     | 1.98642200  | -0.80122700 | -0.93595000 |
| O     | 4.34509900  | -1.10208900 | -0.48385400 |
| S     | 2.33992100  | 0.78348200  | 1.55891700  |
| O     | 2.53468400  | -0.55602700 | 2.03829900  |
| O     | 0.88097200  | 0.87157200  | 0.98400900  |
| O     | 2.56748000  | 1.90201600  | 2.39036100  |
| O     | 3.20779200  | 1.01301900  | 0.25964700  |
| H     | 3.23400600  | -2.65890000 | 0.09906500  |
| H     | 0.47258700  | -0.07798300 | 0.88607700  |
| N     | 0.81514100  | 1.54421200  | -2.05391900 |
| H     | 0.65845800  | 2.21477100  | -1.29197200 |
| H     | 0.30450100  | 1.87433700  | -2.86894500 |
| H     | 1.81990700  | 1.42934000  | -2.25445900 |
| S     | -0.70849400 | -1.79353700 | -0.45413700 |
| O     | -0.07798500 | -3.01896600 | -0.85366300 |
| O     | -0.27175700 | -1.31509900 | 0.86688700  |
| O     | -0.83967000 | -0.74372800 | -1.42950700 |
| S     | -3.47843400 | -1.35259700 | 0.22474100  |
| O     | -3.52221500 | -0.25603700 | -0.69939800 |
| O     | -3.05481600 | -0.80518700 | 1.62040800  |
| O     | -4.57870700 | -2.21569500 | 0.38950700  |
| O     | -2.26460300 | -2.32654000 | -0.16495100 |
| H     | 0.42797600  | 0.62807900  | -1.77000500 |
| H     | -2.60391400 | 0.05457400  | 1.51595600  |
| S     | -1.88607500 | 2.69154700  | -0.16408000 |

|   |             |            |             |
|---|-------------|------------|-------------|
| O | -0.65403000 | 3.41090800 | -0.29487200 |
| O | -3.12494300 | 3.33110600 | 0.05919000  |
| O | -1.69047700 | 1.63600100 | 1.01999500  |
| O | -1.93571200 | 1.76832800 | -1.42330600 |
| H | -0.73585700 | 1.59045200 | 1.23386600  |
| H | -2.51499400 | 0.98098000 | -1.27315900 |

**(SA)<sub>1</sub>·(DSA)<sub>2</sub>·(A)<sub>3</sub>:**

| Atoms | X           | Y           | Z           |
|-------|-------------|-------------|-------------|
| N     | -2.51999000 | -2.10255300 | 1.68586100  |
| H     | -2.66179000 | -1.94588000 | 0.67966300  |
| H     | -2.88384800 | -3.00536300 | 1.96981700  |
| H     | -1.51136500 | -2.01395400 | 1.90962400  |
| S     | -2.73989300 | 1.10681500  | 1.23034100  |
| O     | -2.38587200 | 2.48758500  | 1.45205300  |
| O     | -1.65059400 | 0.29235300  | 0.71447900  |
| O     | -3.53154300 | 0.46062000  | 2.24748400  |
| S     | -3.81546900 | 0.17596300  | -1.25519500 |
| O     | -3.67324900 | -1.13779200 | -0.69403000 |
| O     | -2.54198900 | 0.54713500  | -2.06140500 |
| O     | -4.93861000 | 0.50740900  | -2.04414200 |
| O     | -3.80396100 | 1.25309900  | -0.07405800 |
| H     | -3.02102900 | -1.32637600 | 2.14822300  |
| H     | -1.71148000 | 0.16036600  | -1.69197600 |
| N     | 4.28888900  | -2.20923500 | -0.37897100 |
| H     | 3.90506700  | -2.44111100 | -1.29262600 |
| H     | 5.08427200  | -2.79218000 | -0.14274400 |
| H     | 4.54173900  | -1.20721700 | -0.38478000 |
| S     | 1.10942300  | -1.46982700 | 1.37569600  |
| O     | 0.15094400  | -1.78817000 | 2.40158700  |
| O     | 1.42114800  | -0.04776800 | 1.23348500  |
| O     | 2.29522500  | -2.30630200 | 1.39074000  |
| S     | 0.69839600  | -1.26214200 | -1.47194400 |
| O     | 2.15541900  | -1.04750100 | -1.39728200 |
| O     | 0.00674800  | 0.01401300  | -1.54204200 |
| O     | 0.26632900  | -2.29456200 | -2.34625300 |
| O     | 0.29343300  | -1.87714900 | 0.02076000  |
| H     | 3.50472000  | -2.30252900 | 0.32175800  |
| H     | 0.05203000  | 2.06645500  | -0.77843200 |
| N     | 0.15956600  | 2.27891000  | 0.21401300  |
| H     | 0.36619600  | 1.36859900  | 0.65698600  |
| H     | 0.94159700  | 2.91453100  | 0.35014800  |
| H     | -0.72450100 | 2.63213900  | 0.61640100  |
| S     | 3.81394200  | 1.73522600  | -0.19005900 |
| O     | 4.59950600  | 0.52861500  | -0.11261600 |

|   |            |            |             |
|---|------------|------------|-------------|
| O | 4.41694100 | 2.96511800 | -0.53974200 |
| O | 3.12055100 | 1.96111700 | 1.20416100  |
| O | 2.60644900 | 1.47467000 | -1.13553900 |
| H | 2.67064600 | 1.12637400 | 1.46726000  |
| H | 2.43113500 | 0.47981800 | -1.23816300 |

**(DSA)<sub>1</sub>·(A)<sub>1</sub>:**

| Atoms | X           | Y           | Z           |
|-------|-------------|-------------|-------------|
| N     | 1.39103700  | 2.49577300  | 0.05425100  |
| H     | 0.36403100  | 2.43206600  | 0.07924100  |
| H     | 1.70913000  | 3.36997100  | -0.34808000 |
| H     | 1.75204800  | 2.36086900  | 0.99506100  |
| S     | 1.23309500  | -0.70744200 | -0.02208000 |
| O     | 1.74993600  | -2.02510400 | 0.01713200  |
| O     | 1.05815300  | 0.00463100  | 1.24344400  |
| O     | 1.75554200  | 0.17671500  | -1.05951900 |
| S     | -1.52632100 | 0.03673600  | -0.12635900 |
| O     | -1.06629500 | 1.37280200  | -0.39993600 |
| O     | -1.61646800 | -0.16517600 | 1.42380200  |
| O     | -2.72809900 | -0.42868500 | -0.69974800 |
| O     | -0.38253900 | -0.98851200 | -0.52357100 |
| H     | 1.67058800  | 1.62863800  | -0.51876000 |
| H     | -0.70326600 | -0.10404300 | 1.77497600  |

**(SA)<sub>2</sub>:**

| Atoms | X           | Y           | Z           |
|-------|-------------|-------------|-------------|
| S     | -2.01322700 | -0.06909400 | 0.12032000  |
| O     | -1.03993500 | 0.02070700  | 1.17305600  |
| O     | -3.33344600 | -0.50822700 | 0.37973100  |
| O     | -2.03861500 | 1.38798500  | -0.49770200 |
| H     | -2.80898000 | 1.47208500  | -1.07474100 |
| O     | -1.44840100 | -0.93353400 | -1.03975000 |
| H     | -0.49362800 | -0.70536900 | -1.17055400 |
| O     | 1.03990200  | -0.02023300 | -1.17304000 |
| S     | 2.01323800  | 0.06911400  | -0.12030200 |
| O     | 1.44861400  | 0.93342700  | 1.03995600  |
| O     | 3.33355800  | 0.50799300  | -0.37963200 |
| O     | 2.03830500  | -1.38810900 | 0.49739500  |
| H     | 0.49378000  | 0.70547900  | 1.17068500  |
| H     | 2.80879500  | -1.47259300 | 1.07421100  |

**(SA)<sub>2</sub>·(A)<sub>1</sub>:**

| Atoms | X           | Y           | Z           |
|-------|-------------|-------------|-------------|
| S     | -1.75156900 | -0.35106400 | -0.05309700 |

|   |             |             |             |
|---|-------------|-------------|-------------|
| O | -1.08755700 | 0.22332400  | 1.13077400  |
| O | -0.97588400 | -1.41957800 | -0.65807100 |
| O | -3.09267400 | -1.03007100 | 0.46440300  |
| H | -2.87930000 | -1.91566500 | 0.78109800  |
| O | -2.22526600 | 0.68973700  | -0.94849600 |
| H | -1.40930200 | 2.07376900  | -0.49615300 |
| O | 1.36347800  | 1.03234300  | -0.60427700 |
| S | 2.05584200  | -0.10297800 | -0.02123500 |
| O | 1.42781100  | -0.37315300 | 1.37706700  |
| O | 3.46255300  | -0.06302900 | 0.11092600  |
| O | 1.68407300  | -1.36217100 | -0.85448200 |
| H | 0.44072100  | -0.19621900 | 1.34104900  |
| H | 0.69686100  | -1.43307500 | -0.90284700 |
| N | -0.68866100 | 2.67273600  | -0.01622200 |
| H | 0.21057600  | 2.15515800  | -0.14127600 |
| H | -0.92046500 | 2.68070400  | 0.97367200  |
| H | -0.63909600 | 3.61164500  | -0.39543300 |

**(SA)<sub>2</sub>·(DSA)<sub>1</sub>:**

| Atoms | X           | Y           | Z           |
|-------|-------------|-------------|-------------|
| S     | -0.38040400 | 2.37720100  | -0.13492600 |
| O     | 0.95898800  | 2.43967100  | -0.65606200 |
| O     | -1.01498400 | 3.53934700  | 0.35802100  |
| O     | -0.44607500 | 1.24514500  | 0.94980400  |
| O     | -1.23762100 | 1.73931800  | -1.28917300 |
| H     | 0.45992400  | 0.91391300  | 1.14848700  |
| H     | -2.16452700 | 1.66024100  | -0.98698100 |
| S     | 3.03468600  | -0.04900600 | 0.38831200  |
| O     | 4.36227200  | -0.37422900 | 0.71647800  |
| O     | 2.10425900  | 0.44800300  | 1.35549600  |
| O     | 2.99023300  | 0.81161800  | -0.88013400 |
| S     | 0.86885900  | -1.78465100 | -0.33732000 |
| O     | 0.53272600  | -0.55361100 | -1.23971400 |
| O     | 0.23489600  | -1.62448100 | 0.94063200  |
| O     | 0.77924400  | -3.01106800 | -1.02731300 |
| O     | 2.43502400  | -1.49119900 | -0.17509300 |
| H     | 2.17795700  | 1.39648200  | -0.87701700 |
| H     | -1.39391400 | -1.26302900 | 1.38570900  |
| S     | -2.96705500 | -0.64644500 | 0.14770400  |
| O     | -3.36927100 | 0.71968200  | 0.16497100  |
| O     | -2.35708900 | -1.08137700 | 1.50688100  |
| O     | -2.10529400 | -1.10763400 | -0.91020900 |
| O     | -4.29625200 | -1.47255000 | 0.13445800  |
| H     | -0.44432900 | -0.46082900 | -1.30637800 |
| H     | -4.10093900 | -2.41344200 | 0.02347800  |



**(SA)<sub>2</sub>·(DSA)<sub>1</sub>·(A)<sub>1</sub>:**

| Atoms | X           | Y           | Z           |
|-------|-------------|-------------|-------------|
| N     | -2.03199700 | 1.98480500  | -1.64025700 |
| H     | -1.40392200 | 1.17426900  | -1.74782000 |
| H     | -1.53675100 | 2.66815700  | -1.04061700 |
| H     | -2.25526800 | 2.38840900  | -2.54470100 |
| S     | -2.59331100 | -0.03211400 | 1.00826000  |
| O     | -3.13042900 | -0.41251300 | 2.25993300  |
| O     | -3.43575700 | -0.15204100 | -0.17559500 |
| O     | -1.79000600 | 1.18171000  | 0.95612300  |
| S     | -1.06821400 | -1.75031000 | -0.69886200 |
| O     | -0.83454200 | -0.61428400 | -1.53861000 |
| O     | -2.38448600 | -2.46812600 | -1.12841000 |
| O     | -0.08021100 | -2.76573000 | -0.57650200 |
| O     | -1.39196900 | -1.26092000 | 0.76403200  |
| H     | -2.86794900 | 1.63509300  | -1.16362500 |
| H     | -3.11850900 | -1.82768600 | -1.02985200 |
| S     | 0.99253100  | 2.58597200  | -0.06545800 |
| O     | 2.31430600  | 3.06556300  | 0.07615000  |
| O     | -0.13468500 | 3.47523500  | -0.12881100 |
| O     | 0.76055700  | 1.55675500  | 1.10954800  |
| O     | 0.83323900  | 1.68485500  | -1.33551900 |
| H     | -0.21588200 | 1.35518400  | 1.17860100  |
| H     | 1.37762100  | 0.85706100  | -1.23959500 |
| S     | 2.92117500  | -1.17009800 | 0.17926700  |
| O     | 2.11734600  | -0.52247000 | -0.83473000 |
| O     | 4.32691400  | -1.04191600 | 0.16236900  |
| O     | 2.57646400  | -2.68366900 | 0.17346500  |
| O     | 2.33759300  | -0.74343400 | 1.57442000  |
| H     | 1.63178400  | -2.79781200 | -0.05997800 |
| H     | 1.90330300  | 0.12639500  | 1.49517100  |

**(SA)<sub>2</sub>·(DSA)<sub>1</sub>·(A)<sub>2</sub>:**

| Atoms | X           | Y           | Z           |
|-------|-------------|-------------|-------------|
| N     | 0.37554800  | -1.94641900 | -1.19044400 |
| H     | 1.10152200  | -1.78793200 | -0.45780800 |
| H     | 0.49176900  | -2.87550900 | -1.58466100 |
| H     | -0.56877500 | -1.85210700 | -0.78569300 |
| S     | 0.01581700  | 1.31307000  | -1.30660200 |
| O     | -0.27709000 | 2.72030900  | -1.27608500 |
| O     | -1.17174400 | 0.48116700  | -1.11612100 |
| O     | 0.90357700  | 0.82369400  | -2.34019100 |
| S     | 0.31077000  | 0.68614600  | 1.50570400  |
| O     | -0.32304200 | -0.62580800 | 1.37308800  |

|   |             |             |             |
|---|-------------|-------------|-------------|
| O | -0.64625700 | 1.74801000  | 1.74019400  |
| O | 1.49705000  | 0.71297700  | 2.31264800  |
| O | 0.95896800  | 0.98338000  | 0.01051100  |
| H | 0.49603500  | -1.23497000 | -1.91794500 |
| H | -2.03214000 | 2.09923600  | 0.89843200  |
| N | -2.72325200 | 2.43947000  | 0.18581000  |
| H | -2.14321900 | 2.79726600  | -0.58475100 |
| H | -3.27583900 | 1.63896600  | -0.13185000 |
| H | -3.32038800 | 3.16488700  | 0.56963900  |
| S | -3.41466400 | -1.30065100 | 0.07381000  |
| O | -2.37658300 | -2.17078600 | -0.41370200 |
| O | -4.67380900 | -1.80520200 | 0.46861500  |
| O | -3.71357400 | -0.22862500 | -1.07018900 |
| O | -2.83273700 | -0.40995400 | 1.20157200  |
| H | -2.86015200 | -0.04355200 | -1.50688500 |
| H | -1.81381500 | -0.52518900 | 1.27121100  |
| S | 3.66868100  | -0.79997200 | 0.02627400  |
| O | 2.50831000  | -1.54112300 | 0.47078700  |
| O | 4.92447100  | -1.44102500 | -0.06521800 |
| O | 3.78546500  | 0.46683400  | 0.91790700  |
| O | 3.37802700  | -0.22512800 | -1.40741800 |
| H | 2.97442700  | 0.56466400  | 1.47705500  |
| H | 2.56660500  | 0.31564000  | -1.45246500 |

**(SA)<sub>2</sub>·(DSA)<sub>1</sub>·(A)<sub>3</sub>:**

| Atoms | X           | Y           | Z           |
|-------|-------------|-------------|-------------|
| S     | -1.80849800 | -1.01399400 | 1.02474100  |
| O     | -0.54273300 | -1.58061900 | 0.58457100  |
| O     | -2.15158000 | -0.11014500 | -0.36807300 |
| O     | -2.91535200 | -1.92415700 | 1.14355100  |
| O     | -1.66344800 | -0.03750700 | 2.07929300  |
| H     | 0.10055600  | 0.11328700  | 2.41451400  |
| H     | 1.48544900  | -0.43593600 | 3.21530000  |
| N     | 1.13424800  | 0.05518400  | 2.40052800  |
| H     | 1.54080900  | 0.99730700  | 2.30895300  |
| H     | 1.40510500  | -0.43611500 | 1.52817400  |
| H     | 5.13196300  | 0.54475400  | -0.22677100 |
| N     | 4.23247000  | 0.99212800  | -0.36818300 |
| H     | 3.43218600  | 0.27879700  | -0.29620900 |
| H     | 4.00222100  | 1.69398800  | 0.34514400  |
| H     | 0.83981600  | -0.90516900 | -2.26305100 |
| N     | 0.27505000  | -0.10532700 | -1.94439400 |
| H     | -0.52814700 | 0.07914700  | -2.53904700 |
| H     | -0.05264100 | -0.35783800 | -1.00606300 |
| S     | 2.56157100  | -2.02383300 | -0.47451600 |

|   |             |             |             |
|---|-------------|-------------|-------------|
| O | 2.19644000  | -0.61865600 | -0.08319200 |
| O | 3.97940400  | -2.22043500 | -0.40538000 |
| O | 1.94156800  | -2.91038100 | 0.69375600  |
| O | 1.88028700  | -2.38416200 | -1.70168600 |
| H | 0.97260000  | -2.85702100 | 0.62166600  |
| H | 0.86658600  | 0.73570200  | -1.83018600 |
| S | 1.38361100  | 2.60826200  | 0.07654500  |
| O | 0.83332600  | 3.92721700  | 0.10887600  |
| O | 1.89358600  | 2.14005400  | -1.21373700 |
| O | 2.32460900  | 2.28321700  | 1.16224600  |
| O | 0.13333700  | 1.59669600  | 0.36321000  |
| H | 4.16749000  | 1.44454800  | -1.27605700 |
| H | -0.65278500 | 2.12465900  | 0.55465700  |
| O | -4.19406000 | 0.99054300  | 0.45010500  |
| S | -3.66425200 | 0.35803100  | -0.70272000 |
| O | -4.35878500 | -1.01987600 | -0.95511300 |
| H | -4.23211000 | -1.57151500 | -0.15602900 |
| O | -3.54789600 | 1.00596800  | -1.95785900 |

**(SA)<sub>2</sub>·(A)<sub>2</sub>:**

| Atoms | X           | Y           | Z           |
|-------|-------------|-------------|-------------|
| S     | -1.99375600 | 0.03950600  | -0.14679700 |
| O     | -1.96770800 | 1.49843900  | -0.07048200 |
| O     | -3.42358600 | -0.32337200 | -0.76178300 |
| O     | -1.06994700 | -0.54333200 | -1.10365000 |
| O     | -1.92152200 | -0.59640400 | 1.16575700  |
| H     | -0.60468900 | 2.18376200  | 0.65313600  |
| H     | -4.09078700 | 0.17534600  | -0.27653000 |
| S     | 2.10772600  | -0.06533300 | -0.21735300 |
| O     | 1.97293600  | -1.43365000 | -0.71671300 |
| O     | 1.24928600  | 0.86001100  | -1.20138700 |
| O     | 1.39488600  | 0.04212900  | 1.09037500  |
| O     | 3.41196200  | 0.51312500  | -0.22105800 |
| H     | 0.78789600  | -2.09192900 | 0.15000000  |
| H     | 0.39594100  | 0.39985400  | -1.36649500 |
| N     | 0.14396100  | -2.41317300 | 0.93378300  |
| H     | -0.18316600 | -3.36112700 | 0.78560100  |
| H     | 0.68671400  | -2.34759800 | 1.79018800  |
| H     | -0.66121400 | -1.75146700 | 1.00977700  |
| N     | 0.35234900  | 2.40999100  | 1.00848400  |
| H     | 0.31970800  | 3.00004000  | 1.83116400  |
| H     | 0.83110500  | 1.45569800  | 1.19383700  |
| H     | 0.87614100  | 2.85816600  | 0.26091400  |

**(DSA)<sub>2</sub>:**

| Atoms | X           | Y           | Z           |
|-------|-------------|-------------|-------------|
| S     | -1.41878100 | 1.52046200  | 0.51265300  |
| O     | -2.69600800 | 1.97749800  | 0.90202900  |
| O     | -0.39509500 | 2.40403200  | 0.05763000  |
| O     | -0.75177200 | 0.64196100  | 1.62143800  |
| S     | -2.65392900 | -0.79452000 | -0.54100600 |
| O     | -2.73115000 | -1.07079200 | 0.85848300  |
| O     | -1.80259400 | -1.85627700 | -1.27089700 |
| O     | -3.78153000 | -0.49664300 | -1.32645800 |
| O     | -1.57710700 | 0.46231900  | -0.69698500 |
| H     | -1.38737800 | -0.03921100 | 1.91527500  |
| H     | -1.03860300 | -2.10977000 | -0.70346300 |
| S     | 1.43272500  | -1.42786500 | 0.61381900  |
| O     | 0.20872500  | -2.15792100 | 0.53160200  |
| O     | 1.89523500  | -0.87495500 | 1.82812300  |
| O     | 2.52147400  | -2.31436100 | -0.06327000 |
| S     | 2.44729400  | 0.86296800  | -0.70395500 |
| O     | 3.67656900  | 0.18828700  | -0.45870600 |
| O     | 2.18502300  | 1.79960000  | 0.49286900  |
| O     | 2.11650400  | 1.45421600  | -1.94014200 |
| O     | 1.23916000  | -0.25844100 | -0.48932200 |
| H     | 3.36139800  | -1.81848000 | -0.08343700 |
| H     | 1.28815800  | 2.20254100  | 0.39631900  |

**(DSA)<sub>2</sub>(A)<sub>1</sub>:**

| Atoms | X           | Y           | Z           |
|-------|-------------|-------------|-------------|
| N     | 0.28528300  | -0.68180100 | 2.62406700  |
| H     | -0.59378800 | -1.13366900 | 2.31464700  |
| H     | 0.27206000  | -0.49647800 | 3.62203400  |
| H     | 1.08812700  | -1.25863900 | 2.37430700  |
| S     | 2.45668400  | 0.93644500  | 0.59608300  |
| O     | 3.40054900  | 1.94222600  | 0.28413100  |
| O     | 2.88064400  | -0.20857200 | 1.38851400  |
| O     | 1.12728500  | 1.39851800  | 1.01624900  |
| S     | 1.59351700  | -1.22494400 | -1.03439800 |
| O     | 0.55866300  | -1.39660200 | -0.03502300 |
| O     | 2.83912900  | -2.06307100 | -0.60091300 |
| O     | 1.30960300  | -1.50589800 | -2.38480900 |
| O     | 2.14918600  | 0.25504200  | -0.93662500 |
| H     | 0.41679800  | 0.19733500  | 2.08473200  |
| H     | 3.18096000  | -1.68329900 | 0.23376100  |
| S     | -2.62296000 | -0.90586300 | 0.49237100  |
| O     | -3.99582000 | -0.64698900 | 0.31863500  |
| O     | -2.14273900 | -1.62725200 | 1.63872500  |
| O     | -2.07298100 | -1.52366700 | -0.81588400 |

|   |             |             |             |
|---|-------------|-------------|-------------|
| S | -1.62075800 | 1.49496400  | -0.72878600 |
| O | -0.69288400 | 0.85266600  | -1.58919300 |
| O | -0.96024200 | 2.64782100  | 0.05389400  |
| O | -2.91553400 | 1.88093100  | -1.12983600 |
| O | -1.77844600 | 0.47042000  | 0.60248800  |
| H | -1.09207600 | -1.59167200 | -0.75677100 |
| H | -0.04463700 | 2.37114300  | 0.31995000  |

**(DSA)<sub>2</sub>'(A)<sub>2</sub>:**

| Atoms | X           | Y           | Z            |
|-------|-------------|-------------|--------------|
| N     | -1.06283000 | -1.26663900 | -2.50840500  |
| H     | -1.03918100 | -0.27055900 | -2.23900800  |
| H     | -0.93182000 | -1.37741500 | -3.50867400  |
| H     | -0.31890200 | -1.75008900 | -1.97521000  |
| S     | -2.88270300 | -0.93204000 | 0.22299100   |
| O     | -3.46280900 | -1.35269200 | 1.47136300   |
| O     | -1.44198300 | -1.10220700 | 0.14781000   |
| O     | -3.57241900 | -1.23958000 | -0.99990400  |
| S     | -2.05086500 | 1.78124200  | -0.28564000  |
| O     | -1.74922600 | 1.32294100  | -1.61454500  |
| O     | -0.76685900 | 1.62319600  | 0.59530600   |
| O     | -2.59651700 | 3.06573600  | -0.06175900  |
| O     | -3.05509900 | 0.76889200  | 0.41330200   |
| H     | -1.98732000 | -1.60247400 | -2.21041200  |
| H     | -0.07675000 | 1.04680300  | 0.12022500   |
| N     | -1.01628000 | -0.40345700 | 2.75278200   |
| H     | -1.11800500 | 0.53300700  | 2.34765300   |
| H     | -0.77687200 | -0.34249400 | 3.73772300   |
| H     | -1.90170500 | -0.91090200 | 2.60434400   |
| S     | 1.45886600  | -1.03894800 | -0.09597300  |
| O     | 1.15452900  | -2.15175700 | -0.95485600  |
| O     | 0.99445000  | 0.25561700  | -0.64545200  |
| O     | 1.20086400  | -1.20109900 | 1.31265500   |
| S     | 3.85701600  | 0.43994700  | 0.16932600   |
| O     | 3.21297600  | 0.98589600  | 1.31245400   |
| O     | 3.53451600  | 1.31556600  | -1.09382700  |
| O     | 5.23236900  | 0.12652400  | 0.12019500   |
| O     | 3.09922200  | -0.94489200 | -0.23284300  |
| H     | -0.25515200 | -0.86263700 | 2.20874100   |
| H     | 2.57035800  | 1.44710200  | -1.12645100S |

**(SA)<sub>3</sub>:**

| Atoms | X           | Y           | Z           |
|-------|-------------|-------------|-------------|
| S     | 0.16483700  | 1.30605100  | -0.06336500 |
| O     | -0.10407000 | 0.08451900  | -0.80968300 |
| O     | 1.37746300  | 1.98145900  | -0.39595600 |
| H     | 3.11822700  | 1.29813100  | -0.24755100 |
| O     | 0.10199300  | 0.97627800  | 1.45441800  |
| O     | -1.00412300 | 2.28075600  | -0.20277700 |
| O     | 3.82969200  | 0.63311300  | -0.17992300 |
| S     | 3.19659800  | -0.77206100 | 0.08974300  |
| O     | 4.25644700  | -1.69047600 | 0.22901900  |
| O     | 2.44151500  | -1.08907800 | -1.24922900 |
| O     | -2.42010200 | -1.31989300 | -1.02508800 |
| H     | 1.52576000  | -0.75359300 | -1.20077100 |
| H     | -1.54359000 | -0.87259000 | -1.03690100 |
| O     | 2.19850800  | -0.63473100 | 1.12400800  |
| O     | -3.16961700 | 0.85361300  | -0.19755800 |
| H     | 0.83407900  | 0.33942600  | 1.63195900  |
| H     | -1.87447800 | 1.78339100  | -0.18874100 |
| O     | -4.64837000 | -1.13962700 | -0.15465900 |
| S     | -3.36281200 | -0.56330400 | -0.04568500 |
| O     | -2.73563400 | -0.88198700 | 1.36909700  |
| H     | -3.02757700 | -1.75731700 | 1.65756900  |

**(SA)<sub>3</sub>·(A)<sub>1</sub>:**

| Atoms | X           | Y           | Z           |
|-------|-------------|-------------|-------------|
| N     | -0.04172000 | 0.31393500  | 2.50407500  |
| H     | -0.90969100 | 0.06818900  | 1.98691100  |
| H     | 0.71310500  | -0.29441000 | 2.15097000  |
| H     | -0.17125100 | 0.19382600  | 3.50277600  |
| S     | 1.01542600  | 1.97849500  | -0.14077200 |
| O     | -0.00526000 | 0.92850100  | -0.23378200 |
| O     | 1.18656600  | 2.48449400  | 1.19635500  |
| H     | 0.24693700  | 1.27641200  | 2.27050300  |
| O     | 2.24337900  | 1.55803500  | -0.83387100 |
| S     | -2.86205700 | -0.43166700 | -0.10848500 |
| O     | -2.02181500 | -1.23225400 | -1.15389300 |
| O     | -2.63228000 | 1.05375200  | -0.53246700 |
| O     | -4.23147800 | -0.71882200 | -0.30442500 |
| O     | -2.26109000 | -0.64315900 | 1.19033600  |
| H     | -1.13058000 | -1.44136000 | -0.79715800 |
| H     | -1.66222100 | 1.22940700  | -0.48893400 |
| S     | 1.72178700  | -1.63935800 | -0.07740200 |
| O     | 2.65109800  | -2.91101100 | -0.14869600 |
| O     | 2.16645600  | -0.85899500 | -1.30276100 |
| O     | 0.37004900  | -2.12000700 | -0.20621800 |

|   |            |             |             |
|---|------------|-------------|-------------|
| O | 2.07535500 | -0.93817900 | 1.12542500  |
| H | 2.14919700 | -3.63570300 | -0.54219400 |
| H | 2.22674400 | 0.18299300  | -1.10444000 |
| O | 0.47811700 | 3.22500900  | -0.96825000 |
| H | 0.67455700 | 3.08467700  | -1.90245400 |

**(SA)<sub>3</sub>·(A)<sub>2</sub>:**

| Atoms | X           | Y           | Z           |
|-------|-------------|-------------|-------------|
| N     | 0.04080800  | 0.04080800  | 0.08780100  |
| H     | -0.76321900 | -0.76321900 | -0.54706000 |
| H     | 0.93979000  | 0.93979000  | -0.41363000 |
| H     | 0.08931200  | 0.08931200  | 0.74907100  |
| N     | -2.34151400 | -2.34151400 | 1.67098900  |
| H     | -3.28639200 | -3.28639200 | 1.34957300  |
| H     | -2.17630400 | -2.17630400 | 2.58799900  |
| H     | -2.22980100 | -2.22980100 | 1.68130600  |
| S     | -3.01773500 | -3.01773500 | -0.12741300 |
| O     | -2.49434500 | -2.49434500 | -1.04838500 |
| O     | -2.99705800 | -2.99705800 | -0.66645800 |
| O     | -2.44011400 | -2.44011400 | 1.21337500  |
| H     | -1.33804100 | -1.33804100 | -1.42890100 |
| S     | 0.27373000  | 0.27373000  | -0.39748000 |
| O     | -0.35916500 | -0.35916500 | -1.49334800 |
| O     | 1.58046200  | 1.58046200  | -0.89844300 |
| O     | -0.64753600 | -0.64753600 | -0.22470400 |
| O     | 0.32340100  | 0.32340100  | 0.84468800  |
| H     | -0.13168800 | -0.13168800 | 0.59204600  |
| H     | -1.66304700 | -1.66304700 | 0.95201500  |
| O     | -4.55140600 | -4.55140600 | 0.11903600  |
| H     | -4.94495500 | -4.94495500 | -0.73381900 |
| S     | 3.42424600  | 3.42424600  | 0.12698000  |
| O     | 3.89261900  | 3.89261900  | -0.32505500 |
| O     | 2.62104500  | 2.62104500  | 1.44668900  |
| O     | 4.56295900  | 4.56295900  | 0.47398200  |
| O     | 2.48760400  | 2.48760400  | -0.85833400 |
| H     | 3.09999000  | 3.09999000  | -0.64371300 |
| H     | 1.79771600  | 1.79771600  | 1.24585300  |

**(SA)<sub>3</sub>·(A)<sub>3</sub>:**

| Atoms | X          | Y           | Z           |
|-------|------------|-------------|-------------|
| S     | 2.60141600 | -1.19585400 | 0.09028500  |
| O     | 1.48413400 | -2.08386400 | 0.36783500  |
| O     | 3.92882800 | -2.09122400 | 0.15651500  |
| O     | 2.64333500 | -0.67818000 | -1.26933200 |

|   |             |             |             |
|---|-------------|-------------|-------------|
| H | 3.92528500  | -2.56696900 | 0.99505500  |
| S | -2.73331100 | -1.02693500 | 0.00470300  |
| O | -2.78264800 | 0.26465500  | 0.66745400  |
| O | -4.06497900 | -1.75400600 | 0.51531200  |
| O | -2.83320700 | -0.99509200 | -1.44855000 |
| H | -4.30626800 | -2.41338000 | -0.14407300 |
| S | -0.34333100 | 2.24129800  | 0.02140700  |
| O | 0.26545600  | 0.92835600  | -0.28703000 |
| O | -0.60525300 | 2.36316200  | 1.44529000  |
| O | -1.71298000 | 2.30527000  | -0.74363100 |
| O | 0.44986700  | 3.32229000  | -0.55386900 |
| H | 1.94532200  | 2.65273900  | -0.68157200 |
| O | 2.75488900  | -0.16732100 | 1.12583000  |
| N | -0.07985100 | -0.27110800 | 2.17282900  |
| N | 2.80483500  | 2.03905400  | -0.63408200 |
| N | -0.08936400 | -1.27196600 | -1.83994300 |
| H | 3.65956600  | 2.54992200  | -0.82231000 |
| H | 2.84235300  | 1.58042200  | 0.28701900  |
| H | 2.70046200  | 1.23535100  | -1.26789800 |
| H | -2.30374600 | 1.63719400  | -0.32205100 |
| H | 0.20145100  | -1.90642500 | -1.08397800 |
| H | 0.51392500  | -1.39430700 | -2.64518600 |
| H | -1.09237500 | -1.39308200 | -2.03483900 |
| H | 0.03941600  | -0.31894800 | -1.44051300 |
| H | 0.91162700  | -0.26388400 | 1.90403900  |
| H | -0.59002500 | -0.90705900 | 1.52372800  |
| H | -0.45080700 | 0.69119800  | 2.04875500  |
| H | -0.19333800 | -0.58822500 | 3.12877200  |
| O | -1.60662500 | -1.84665700 | 0.45914400  |

**(DSA)<sub>3</sub>:**

| Atoms | X           | Y           | Z           |
|-------|-------------|-------------|-------------|
| S     | 0.20058700  | -1.09702200 | -1.15759400 |
| O     | -0.75267800 | -1.23915500 | -2.18655000 |
| O     | 1.41227700  | -1.85381200 | -1.13531800 |
| O     | 0.61345500  | 0.37737400  | -0.92256800 |
| S     | -0.65836100 | -0.58956900 | 1.57248700  |
| O     | -0.96210400 | 0.75850000  | 1.24735200  |
| O     | 0.77513700  | -0.71673600 | 2.11662200  |
| O     | -1.54732800 | -1.36272000 | 2.37363400  |
| O     | -0.58860700 | -1.48732000 | 0.21606500  |
| H     | -0.16170800 | 0.97743800  | -1.06934500 |
| H     | 1.27191500  | 0.13194600  | 1.97015700  |
| S     | 3.16751900  | 1.44593000  | 0.66771900  |
| O     | 2.11537600  | 1.54845200  | 1.62857800  |



|   |             |             |             |
|---|-------------|-------------|-------------|
| O | 3.09683700  | 2.04295000  | -0.61014100 |
| O | 4.47876400  | 1.84417900  | 1.40927300  |
| S | 4.47540600  | -0.76257600 | -0.53237500 |
| O | 5.54265900  | 0.17809900  | -0.57016500 |
| O | 3.70722500  | -0.64915700 | -1.86685400 |
| O | 4.62866300  | -2.09812000 | -0.10838500 |
| O | 3.34601500  | -0.15791000 | 0.52269500  |
| H | 5.23016800  | 1.73824800  | 0.79697400  |
| H | 2.88860200  | -1.19670800 | -1.80949100 |
| S | -2.98114400 | 1.49977200  | -0.86663300 |
| O | -1.70753200 | 1.67676000  | -1.48070000 |
| O | -3.40748300 | 2.24270700  | 0.25560300  |
| O | -4.02611000 | 1.56313900  | -2.02210500 |
| S | -4.31055300 | -0.72598200 | 0.27882700  |
| O | -5.45430200 | -0.01498400 | -0.18075800 |
| O | -4.04308800 | -0.27092900 | 1.73470100  |
| O | -4.13280000 | -2.11690900 | 0.12305200  |
| O | -3.01137400 | -0.09004300 | -0.51251800 |
| H | -4.90978200 | 1.38516300  | -1.65097100 |
| H | -3.27849100 | -0.75983900 | 2.11165600  |

**(DSA)<sub>3</sub>'(A)<sub>1</sub>:**

| Atoms | X           | Y           | Z           |
|-------|-------------|-------------|-------------|
| N     | 0.23627200  | -1.96073500 | -0.71711400 |
| H     | 0.83135000  | -1.22419300 | -1.11189500 |
| H     | -0.47464300 | -2.24639700 | -1.39057000 |
| H     | 0.84398700  | -2.72280400 | -0.41636300 |
| S     | 2.99428800  | -1.48147900 | 1.19230900  |
| O     | 3.76092700  | -1.69912900 | 2.35965600  |
| O     | 2.97618200  | -2.50494100 | 0.15723500  |
| O     | 1.65954800  | -0.91023800 | 1.36184900  |
| S     | 3.73770700  | 0.04348500  | -1.10731600 |
| O     | 2.32973500  | 0.00638000  | -1.45803700 |
| O     | 4.43420500  | -1.21505500 | -1.70193400 |
| O     | 4.49012600  | 1.18658900  | -1.44125800 |
| O     | 3.86007400  | -0.19336100 | 0.44978000  |
| H     | -0.24547700 | -1.57048500 | 0.10341800  |
| H     | 4.05873700  | -2.00721700 | -1.26167300 |
| S     | -0.48334000 | 1.55748600  | -1.35759100 |
| O     | -1.49019000 | 2.53697800  | -1.24910900 |
| O     | -0.65340400 | 0.31538200  | -2.03458400 |
| O     | 0.83077100  | 2.24481400  | -1.79209600 |
| S     | 0.01972700  | 2.04173200  | 1.42562100  |
| O     | 0.90228500  | 3.08888000  | 1.08400800  |
| O     | 0.56881200  | 1.04469200  | 2.43433600  |

|   |             |             |             |
|---|-------------|-------------|-------------|
| O | -1.32676800 | 2.37093800  | 1.82356100  |
| O | -0.09671100 | 1.01675700  | 0.15251600  |
| H | 1.54102900  | 1.56537600  | -1.84574600 |
| H | 1.12685400  | 0.27775100  | 2.03071400  |
| S | -3.44921300 | -0.97270500 | -1.36363300 |
| O | -2.57837800 | -2.10286000 | -1.27881300 |
| O | -3.54011100 | -0.14399100 | -2.49453500 |
| O | -4.89306500 | -1.38041200 | -0.94914900 |
| S | -2.82890800 | -0.63503300 | 1.37361800  |
| O | -3.87627900 | -1.58120200 | 1.57208600  |
| O | -3.10315200 | 0.61193200  | 2.19430100  |
| O | -1.46587100 | -1.04753600 | 1.46941300  |
| O | -3.03189700 | 0.01798200  | -0.12242900 |
| H | -4.87209300 | -1.81925600 | -0.07695900 |
| H | -2.36253400 | 1.31580500  | 2.08637700  |

**(DSA)<sub>3</sub>(A)<sub>2</sub>:**

| Atoms | X           | Y           | Z           |
|-------|-------------|-------------|-------------|
| N     | -0.66041100 | -0.35858300 | 2.45263400  |
| H     | -0.30164800 | 0.60118200  | 2.51435900  |
| H     | 0.13690500  | -1.01375200 | 2.54886000  |
| H     | -1.38635500 | -0.52973500 | 3.14244300  |
| S     | -1.08763400 | -2.42013500 | -0.81829300 |
| O     | -0.92506100 | -3.58220100 | -1.60844000 |
| O     | -0.86045500 | -2.52573600 | 0.61572200  |
| O     | -0.77571200 | -1.13423700 | -1.37235000 |
| S     | -3.63437000 | -1.56988600 | 0.31981100  |
| O     | -2.93540100 | -0.28391100 | 0.50457700  |
| O     | -3.31331600 | -2.40553400 | 1.60697800  |
| O     | -5.03221700 | -1.52992000 | 0.13787400  |
| O     | -2.93960200 | -2.33469900 | -0.81200200 |
| H     | -1.04527300 | -0.49920600 | 1.51155700  |
| H     | -2.40339600 | -2.76174800 | 1.49687500  |
| S     | 0.20530000  | 2.89462700  | 0.88943800  |
| O     | 1.33714400  | 2.94939200  | 0.04788300  |
| O     | 0.25296000  | 2.44757400  | 2.24293500  |
| O     | -0.47544400 | 4.30079600  | 0.80227100  |
| S     | -1.89470000 | 2.50362500  | -1.01860100 |
| O     | -2.85501800 | 3.33046000  | -0.37814900 |
| O     | -2.42405800 | 1.15660600  | -1.45459100 |
| O     | -1.02185200 | 3.01980200  | -2.01885500 |
| O     | -0.91574300 | 1.93183600  | 0.22655000  |
| H     | -1.33788000 | 4.30929600  | 1.24666100  |
| H     | -2.69974100 | 0.53578500  | -0.65607200 |
| N     | 1.03465500  | 0.82325900  | -2.03991000 |

|   |            |             |             |
|---|------------|-------------|-------------|
| H | 1.99624500 | 0.81698700  | -2.37849300 |
| H | 0.58203500 | 1.72379100  | -2.20998000 |
| H | 0.48427800 | 0.06373300  | -2.44290500 |
| S | 1.98658500 | -1.16394100 | 0.77541700  |
| O | 1.74077900 | -1.79002200 | 2.04717000  |
| O | 2.01465000 | -2.00086400 | -0.40316200 |
| O | 1.23499400 | 0.07459300  | 0.60205500  |
| S | 4.46328600 | -0.37101000 | -0.34654800 |
| O | 3.66416400 | 0.38622300  | -1.26134800 |
| O | 4.67308900 | -1.81475700 | -0.90706300 |
| O | 5.70869100 | 0.10406900  | 0.11341300  |
| O | 3.58026100 | -0.66051100 | 0.96366800  |
| H | 1.08766400 | 0.63388100  | -1.01491300 |
| H | 3.78917200 | -2.21710600 | -1.02815300 |

**(DSA)<sub>3</sub>·(A)<sub>3</sub>:**

| Atoms | X           | Y           | Z           |
|-------|-------------|-------------|-------------|
| N     | -4.05000800 | 2.05521800  | 0.68059200  |
| H     | -3.51014800 | 1.42083700  | 1.29826600  |
| H     | -4.55280800 | 2.75404100  | 1.21663400  |
| H     | -3.38727800 | 2.49070700  | 0.02183800  |
| S     | -3.70982800 | -0.79855400 | -0.86879100 |
| O     | -3.66545400 | -1.69780000 | -1.98856500 |
| O     | -2.76191800 | 0.30192500  | -0.92989400 |
| O     | -4.99946600 | -0.42280700 | -0.34966700 |
| S     | -2.19912800 | -1.18221100 | 1.52852400  |
| O     | -2.92812600 | -0.05873700 | 2.06711100  |
| O     | -0.90602200 | -0.76319600 | 0.90343800  |
| O     | -1.98048700 | -2.29294200 | 2.42532700  |
| O     | -3.04115800 | -1.82073900 | 0.33668500  |
| H     | -4.68990400 | 1.43023600  | 0.17066800  |
| H     | -0.79618900 | 0.61522700  | 0.73434400  |
| N     | -0.77890000 | -1.27179600 | -2.07383100 |
| H     | -0.63766100 | -1.47892800 | -1.07740500 |
| H     | -0.00235800 | -1.68416000 | -2.59828100 |
| H     | -1.69853700 | -1.62968500 | -2.35914900 |
| S     | -0.68175800 | 2.36840500  | -0.60726100 |
| O     | -1.86423600 | 3.14656200  | -0.81611300 |
| O     | -0.72484300 | 1.67789900  | 0.75509400  |
| O     | -0.21230200 | 1.49259200  | -1.63105400 |
| S     | 2.01698600  | 3.16437800  | -0.02098600 |
| O     | 2.40645300  | 2.09568000  | -0.86715700 |
| O     | 1.92740500  | 2.67623700  | 1.45088900  |
| O     | 2.60206900  | 4.44669600  | -0.03629300 |
| O     | 0.42311600  | 3.50710000  | -0.33158100 |

---

|   |             |             |             |
|---|-------------|-------------|-------------|
| H | -0.77981000 | -0.24798400 | -2.15438400 |
| H | 1.88253400  | 1.69281500  | 1.46370400  |
| N | 0.77094500  | -2.44957600 | 2.36645400  |
| H | 0.94880600  | -2.77060300 | 1.39942200  |
| H | -0.24778300 | -2.51949200 | 2.55866400  |
| H | 1.33412300  | -2.97011600 | 3.03025900  |
| S | 3.17416700  | -0.52117500 | 0.62509800  |
| O | 4.31012800  | 0.31723600  | 0.61852700  |
| O | 3.47541800  | -1.90225100 | 1.33214900  |
| O | 1.97394100  | -0.05823100 | 1.29584500  |
| S | 2.24319400  | -2.53933000 | -1.24683200 |
| O | 1.09604000  | -2.68755800 | -0.36751100 |
| O | 3.37940900  | -3.35653200 | -0.91858700 |
| O | 1.91850000  | -2.32776700 | -2.62215400 |
| O | 2.83816600  | -0.93693100 | -0.84147900 |
| H | 1.04413800  | -1.46166300 | 2.35613700  |
| H | 3.86739000  | -2.53385600 | 0.69063500  |

---
