# Supplementary material for: Reaction of SO 3 with H 2 SO 4 and Its Implication for Aerosol Particle Formation in the Gas Phase and at the Air-Water Interface
Source: Copernicus journal article supplement (doi:10.5194/egusphere-2023-2009), 2023-10-13
Supplement: Supplementary file [file egusphere-2023-2009-AC1-supplement.pdf]

1 **Responses to Referee #1's comments**

2 We are grateful to the reviewers for their valuable and helpful comments on our manuscript  
3 "Reaction of SO<sub>3</sub> with H<sub>2</sub>SO<sub>4</sub> and Its Implication for Aerosol Particle Formation in the Gas Phase  
4 and at the Air-Water Interface" (MS No.: **egusphere-2023-2009**). We have revised the manuscript  
5 carefully according to reviewers' comments. The point-to-point responses to the Referee #1's  
6 comments are summarized below:

7

8 **Referee Comments:**

9 Rui Wang and co-authors have used computational methods to study the formation and clustering  
10 of H<sub>2</sub>S<sub>2</sub>O<sub>7</sub>-known (depending on the source) as either disulfuric acid, pyrosulfuric acid, or oleum.  
11 The technical methods used in the study are broadly appropriate, and the context (atmospheric new-  
12 particle formation involving different sulfur compounds) is certainly relevant and broadly  
13 interesting. The study is thus without doubt publishable. However, I have some critical notes about  
14 the interpretation of the results, and their atmospheric implications (which I believe to be overstated,  
15 at least in the context of Earth's lower atmosphere).

16 **Response:** We would like to thank the reviewer for the positive and valuable comments, and we  
17 have revised our manuscript accordingly.

18 **Major issues**

19 **Comment 1.**

20 As shown by Torrent-Sucarrat (JACS 2012; cited in the present study), the SO<sub>3</sub> + H<sub>2</sub>SO<sub>4</sub> reaction in  
21 the presence of water can also lead directly to H<sub>2</sub>SO<sub>4</sub> + H<sub>2</sub>SO<sub>4</sub> (instead of H<sub>2</sub>S<sub>2</sub>O<sub>7</sub>). Given that  
22 H<sub>2</sub>SO<sub>4</sub> is pretty much always hydrated, water is - as the authors themselves argue here - essentially  
23 always present in the reaction system, at least in the lower troposphere. Thus, an explicit  
24 consideration of the competition between the two channels would be warranted - however this seems  
25 to be missing in the study. The authors should try to estimate what percentage of SO<sub>3</sub> + H<sub>2</sub>SO<sub>4</sub>  
26 collisions, in different hydration environments, we can expect to yield (at least transiently, see below)  
27 H<sub>2</sub>S<sub>2</sub>O<sub>7</sub>, as compared to H<sub>2</sub>SO<sub>4</sub> + H<sub>2</sub>SO<sub>4</sub>? (Note that this question should be asked on top of the  
28 question that they DO address, i.e. "what fraction of SO<sub>3</sub> will collide with H<sub>2</sub>SO<sub>4</sub> as opposed to H<sub>2</sub>O,  
29 or H<sub>2</sub>O\*X, where X is any other catalyst for the SO<sub>3</sub> hydration reaction. As per the authors own

1 calculation in their Table S6, already this percentage is very small-despite their neglect of many  
2 other known candidates for X.)

3 **Response:** Thanks for your valuable comments. According to the reviewer's suggestion, the  
4 schematic potential energy surface of the H<sub>2</sub>SO<sub>4</sub> formation from the SO<sub>3</sub> + H<sub>2</sub>SO<sub>4</sub> reaction with  
5 H<sub>2</sub>O has been added in Fig. 1, while the corresponding effective rate constants have been listed in  
6 Table 1. Then, the competition between H<sub>2</sub>SO<sub>4</sub> and H<sub>2</sub>S<sub>2</sub>O<sub>7</sub> formations from the SO<sub>3</sub> + H<sub>2</sub>SO<sub>4</sub>  
7 reaction with H<sub>2</sub>O have been discussed. The corresponding major revision has been made as follows.

8 (a) The SO<sub>3</sub> + H<sub>2</sub>SO<sub>4</sub> reaction with H<sub>2</sub>O can produce two distinct products, labeled (i) H<sub>2</sub>S<sub>2</sub>O<sub>7</sub>  
9 (DSA, Channel DSA\_WM) and (ii) H<sub>2</sub>SO<sub>4</sub> (SA, Channel SA\_SA). A single water molecule in (i)  
10 acts as a catalyst, while it plays as a reactant in (ii). So, based on the H<sub>2</sub>S<sub>2</sub>O<sub>7</sub> formation from the  
11 SO<sub>3</sub> + H<sub>2</sub>SO<sub>4</sub> reaction with H<sub>2</sub>O, the schematic potential energy surface for the H<sub>2</sub>SO<sub>4</sub> formation  
12 from the SO<sub>3</sub> + H<sub>2</sub>SO<sub>4</sub> reaction with H<sub>2</sub>O is also involved in Fig. 1. In Lines 18-21 Page 8 of the  
13 revised manuscript, the corresponding discussion has been reorganized as “The SO<sub>3</sub> + H<sub>2</sub>SO<sub>4</sub>  
14 reaction with H<sub>2</sub>O produced two distinct products, labeled (i) H<sub>2</sub>S<sub>2</sub>O<sub>7</sub> (DSA, Channel DSA\_WM)  
15 and (ii) H<sub>2</sub>SO<sub>4</sub> (SA, Channel SA\_SA). A single water molecule in (i) acted as a catalyst, while it  
16 played as a reactant in (ii). The schematic potential energy surface for the SO<sub>3</sub> + H<sub>2</sub>SO<sub>4</sub> reaction  
17 with H<sub>2</sub>O was shown in Fig. 1.”

18 (b) Similar with the H<sub>2</sub>S<sub>2</sub>O<sub>7</sub> formation from the SO<sub>3</sub> + H<sub>2</sub>SO<sub>4</sub> reaction with H<sub>2</sub>O (Fig. 1 (b),  
19 Channel DSA\_WM), the H<sub>2</sub>SO<sub>4</sub> formation from the SO<sub>3</sub> + H<sub>2</sub>SO<sub>4</sub> reaction with H<sub>2</sub>O (Fig. 1 (c),  
20 Channel SA\_SA) can be considered as a sequential bimolecular process. In other words, Channel  
21 SA\_SA occurs via the collision between SO<sub>3</sub> (or H<sub>2</sub>SO<sub>4</sub>) and H<sub>2</sub>O to form dimer (SO<sub>3</sub>···H<sub>2</sub>O and  
22 H<sub>2</sub>SO<sub>4</sub>···H<sub>2</sub>O) first, and then the dimer encounters with the third reactant H<sub>2</sub>SO<sub>4</sub> or SO<sub>3</sub>. However,  
23 the SO<sub>3</sub>···H<sub>2</sub>O + H<sub>2</sub>SO<sub>4</sub> reaction in Channel SA\_SA can be neglected as its effective rate constant  
24 is smaller by 1.02-3.05 times than the corresponding value in the H<sub>2</sub>SO<sub>4</sub>···H<sub>2</sub>O + SO<sub>3</sub> reaction.  
25 Therefore, we only consider the H<sub>2</sub>SO<sub>4</sub>···H<sub>2</sub>O + SO<sub>3</sub> bimolecular reaction in Channel SA\_SA. In  
26 Lines 21-29 Page 8 to lines 1-17 Page 9 of the revised manuscript, two sequential bimolecular  
27 processes, H<sub>2</sub>SO<sub>4</sub>···H<sub>2</sub>O + SO<sub>3</sub> and SO<sub>3</sub>···H<sub>2</sub>O + H<sub>2</sub>SO<sub>4</sub>, have been considered, which has been  
28 reorganized as “As the probability of simultaneous collision (Pérez-Ríos et al., 2014; Elm et al.,  
29 2013) of three molecules of SO<sub>3</sub>, SA and H<sub>2</sub>O is quite low under realistic conditions, both Channel  
30 DSA\_WM and Channel SA\_SA can be considered as a sequential bimolecular process. In other

1 words, both Channel DSA\_WM and Channel SA\_SA occur via the collision between SO<sub>3</sub> (or H<sub>2</sub>SO<sub>4</sub>)  
2 and H<sub>2</sub>O to form dimer (SO<sub>3</sub>···H<sub>2</sub>O and H<sub>2</sub>SO<sub>4</sub>···H<sub>2</sub>O) first, and then the dimer encounters with the  
3 third reactant H<sub>2</sub>SO<sub>4</sub> or SO<sub>3</sub>. The computed Gibbs free energies of dimer complexes SO<sub>3</sub>···H<sub>2</sub>O and  
4 H<sub>2</sub>SO<sub>4</sub>···H<sub>2</sub>O were respectively 0.8 kcal·mol<sup>-1</sup> and -1.9 kcal·mol<sup>-1</sup>, which were respectively  
5 consistent with the previous values (the range from -0.2 to 0.62 kcal·mol<sup>-1</sup> for SO<sub>3</sub>···H<sub>2</sub>O complex  
6 (Bandyopadhyay et al., 2017; Long et al., 2012) and the range from -1.82 to -2.63 kcal·mol<sup>-1</sup> for  
7 H<sub>2</sub>SO<sub>4</sub>···H<sub>2</sub>O complex (Long et al., 2013b; Tan et al., 2018)). The Gibbs free energy of H<sub>2</sub>SO<sub>4</sub>···H<sub>2</sub>O  
8 was lower by 2.7 kcal·mol<sup>-1</sup> than that of SO<sub>3</sub>···H<sub>2</sub>O, thus leading to that the equilibrium constant of  
9 the former complex is larger by 1-2 orders of magnitude than that of the latter one in Table S2.  
10 Additionally, the larger equilibrium constant of H<sub>2</sub>SO<sub>4</sub>···H<sub>2</sub>O complex leads to its higher  
11 concentration in the atmosphere. For example, when the concentrations of SO<sub>3</sub> (Yao et al., 2020),  
12 H<sub>2</sub>SO<sub>4</sub> (Liu et al., 2015) and H<sub>2</sub>O (Anglada et al., 2013) were 10<sup>6</sup>, 10<sup>8</sup> and 10<sup>17</sup> molecules·cm<sup>-3</sup>,  
13 respectively, the concentrations of SO<sub>3</sub>···H<sub>2</sub>O and H<sub>2</sub>SO<sub>4</sub>···H<sub>2</sub>O were 2.41 × 10<sup>3</sup>-2.01 × 10<sup>4</sup> and  
14 5.01 × 10<sup>5</sup>-3.01 × 10<sup>8</sup> molecules·cm<sup>-3</sup> within the temperature range of 280-320 K (see Table S3),  
15 respectively. So, we predict that Channel DSA\_WM and Channel SA\_SA mainly take place via the  
16 collision of H<sub>2</sub>SO<sub>4</sub>···H<sub>2</sub>O with SO<sub>3</sub>. In order to check this prediction, the effective rate constants for  
17 two bimolecular reactions of H<sub>2</sub>SO<sub>4</sub>···H<sub>2</sub>O + SO<sub>3</sub> and SO<sub>3</sub>···H<sub>2</sub>O + H<sub>2</sub>SO<sub>4</sub> were calculated, and the  
18 details were shown in *SI Appendix*, Part 3 and Table 1. As seen in Table 1, the SO<sub>3</sub>···H<sub>2</sub>O + H<sub>2</sub>SO<sub>4</sub>  
19 reaction in both Channel DSA\_WM and Channel SA\_SA can be neglected as their effective rate  
20 constants are smaller by 16.7-48.5 and 1.02-3.05 times than the corresponding values in the  
21 H<sub>2</sub>SO<sub>4</sub>···H<sub>2</sub>O + SO<sub>3</sub> reaction within the temperature range of 280-320 K, respectively. Therefore,  
22 we only consider the H<sub>2</sub>SO<sub>4</sub>···H<sub>2</sub>O + SO<sub>3</sub> bimolecular reaction in both Channel DSA\_WM and  
23 Channel SA\_SA.”

24 (c) As for the H<sub>2</sub>SO<sub>4</sub> formation from the SO<sub>3</sub> + H<sub>2</sub>SO<sub>4</sub> reaction with H<sub>2</sub>O, the discussion of  
25 the stepwise H<sub>2</sub>SO<sub>4</sub>···H<sub>2</sub>O + SO<sub>3</sub> reaction has been added in Lines 8-21 Page 10 of the revised  
26 manuscript, which has been reorganized as “Regarding Channel SA\_SA, the stepwise reaction  
27 occurred firstly via the ring enlargement from six-membered ring complex IM<sub>SA\_SA</sub>' to a cage-like  
28 hydrogen bonding network IM<sub>SA\_SA</sub>, and then took place by going through a transition state, TS<sub>SA\_SA</sub>,  
29 to from the product complex (H<sub>2</sub>SO<sub>4</sub>)<sub>2</sub>. TS<sub>DSA\_WM</sub> was in the middle of a double hydrogen transfer,  
30 where H<sub>2</sub>SO<sub>4</sub> acted as a bridge of hydrogen atom from the H<sub>2</sub>O to SO<sub>3</sub> along with O1 atom of H<sub>2</sub>O

1 addition to the S atom of SO<sub>3</sub>. It is worth noting that the energy barriers of two elementary reactions  
 2 involved in the stepwise route of Channel SA\_SA were only 1.8 and 0.6 kcal·mol<sup>-1</sup>, respectively,  
 3 showing that the stepwise route of Channel SA\_SA is feasible to take place from energetic point of  
 4 view.

5 (d) The discussion of the competition between the SO<sub>3</sub> + H<sub>2</sub>SO<sub>4</sub> reaction with H<sub>2</sub>O and the  
 6 hydrolysis of SO<sub>3</sub> with H<sub>2</sub>SO<sub>4</sub> have been discussed in Lines 8-14 Page 9 of the revised manuscript,  
 7 which has been reorganized as “To check whether Channel DSA\_WM is more favorable than  
 8 Channel SA\_SA or not, their rate ratio listed in Eq. 4 has been calculated in Table 1. The calculated  
 9 rate ratio  $\frac{v_{\text{DSA\_WM}_s}}{v_{\text{SA\_SA}_s}}$  shows that Channel DSA\_WM is more important than Channel SA\_SA  
 10 because the rate ratio  $\frac{v_{\text{DSA\_WM}_s}}{v_{\text{SA\_SA}_s}}$  is 1.53-3.04 within the temperature range of 280-320 K. So,  
 11 we predicted that the SO<sub>3</sub> + H<sub>2</sub>SO<sub>4</sub> reaction with H<sub>2</sub>O producing H<sub>2</sub>S<sub>2</sub>O<sub>7</sub> is more favorable than that  
 12 forming H<sub>2</sub>SO<sub>4</sub>.

$$13 \quad \frac{v_{\text{DSA\_WM}}}{v_{\text{SA\_SA}}} = \frac{v_{\text{DSA\_WM}_s} + v_{\text{DSA\_WM}_o}}{v_{\text{SA\_SA}_s} + v_{\text{SA\_SA}_o}} = \frac{k_{\text{DSA\_WM}_s} \times K_{\text{eq}(\text{H}_2\text{SO}_4 \cdots \text{H}_2\text{O})} + k_{\text{DSA\_WM}_o} \times K_{\text{eq}(\text{SO}_3 \cdots \text{H}_2\text{O})}}{k_{\text{SA\_SA}_s} \times K_{\text{eq}(\text{H}_2\text{SO}_4 \cdots \text{H}_2\text{O})} + k_{\text{SA\_SA}_o} \times K_{\text{eq}(\text{SO}_3 \cdots \text{H}_2\text{O})}} \quad (4)''$$

14 Overall, in the SO<sub>3</sub> + H<sub>2</sub>SO<sub>4</sub> reaction with H<sub>2</sub>O, a single water molecule both acting as a  
 15 catalyst and a reactant has been investigated. Meanwhile, these two kinds of reactions mainly take  
 16 place via the collision of H<sub>2</sub>SO<sub>4</sub>···H<sub>2</sub>O with SO<sub>3</sub>. Moreover, the SO<sub>3</sub> + H<sub>2</sub>SO<sub>4</sub> reaction with H<sub>2</sub>O  
 17 producing H<sub>2</sub>S<sub>2</sub>O<sub>7</sub> is more favorable than that forming H<sub>2</sub>SO<sub>4</sub> as the rate ratio  $\frac{v_{\text{DSA\_WM}}}{v_{\text{SA\_SA}}}$  is  
 18 1.53-3.04 within the temperature range of 280-320 K.

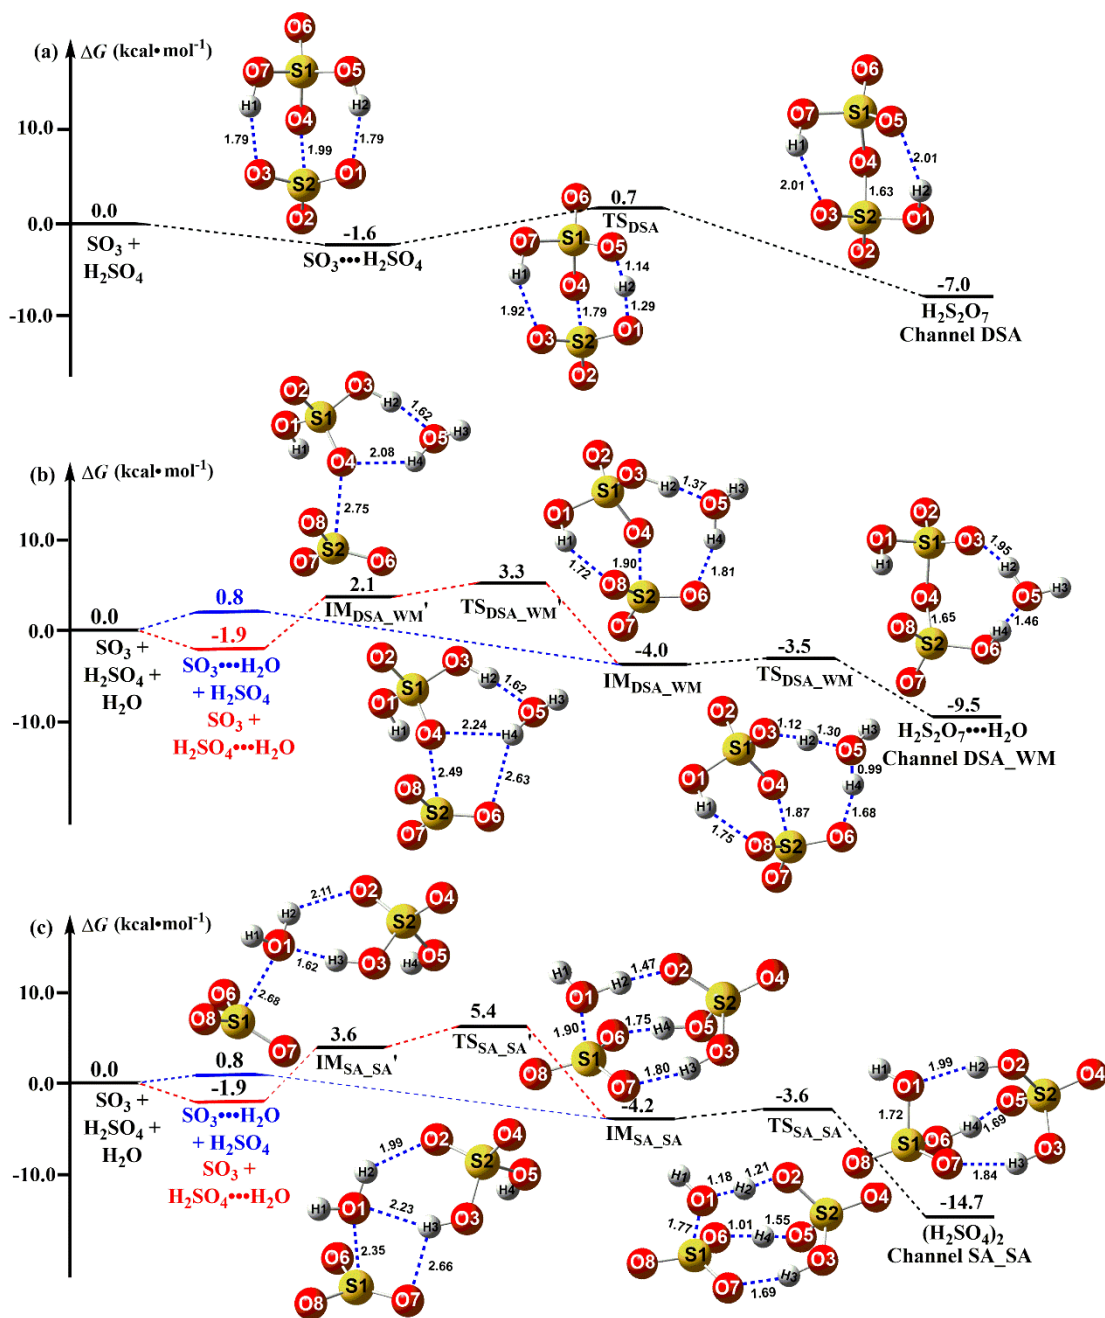

1

2

**Fig. 1** Schematic potential energy surface of the  $\text{SO}_3 + \text{H}_2\text{SO}_4$  reaction without and with  $\text{H}_2\text{O}$  at the CCSD(T)-F12/cc-pVDZ-F12//M06-2X/6-311+G(2df,2pd) level

3

**Table 1** The rate constant ( $\text{cm}^3 \cdot \text{molecule}^{-1} \cdot \text{s}^{-1}$ ) for the  $\text{SO}_3 + \text{H}_2\text{SO}_4$  reaction along with the effective rate constant ( $\text{cm}^3 \cdot \text{molecule}^{-1} \cdot \text{s}^{-1}$ ) for the  $\text{SO}_3 + \text{H}_2\text{SO}_4$  reaction with  $\text{H}_2\text{O}$  (100%RH) within the temperature range of 280-320 K

4

5

6

| $T(\text{K})$           | 280 K                  | 290 K                  | 298 K                  | 300 K                  | 310 K                  | 320 K                  |
|-------------------------|------------------------|------------------------|------------------------|------------------------|------------------------|------------------------|
| $k_{\text{DSA}}$        | $5.52 \times 10^{-12}$ | $4.60 \times 10^{-12}$ | $3.95 \times 10^{-12}$ | $3.80 \times 10^{-12}$ | $3.13 \times 10^{-12}$ | $2.57 \times 10^{-12}$ |
| $k'_{\text{DSA\_WM}_o}$ | $2.12 \times 10^{-13}$ | $2.68 \times 10^{-13}$ | $2.88 \times 10^{-13}$ | $2.89 \times 10^{-13}$ | $2.89 \times 10^{-13}$ | $2.75 \times 10^{-13}$ |
| $k'_{\text{DSA\_WM}_s}$ | $1.03 \times 10^{-11}$ | $8.55 \times 10^{-12}$ | $7.42 \times 10^{-12}$ | $7.11 \times 10^{-12}$ | $5.79 \times 10^{-12}$ | $4.60 \times 10^{-12}$ |
| $k'_{\text{SA\_SA}_o}$  | $1.29 \times 10^{-21}$ | $8.69 \times 10^{-22}$ | $6.00 \times 10^{-22}$ | $5.37 \times 10^{-22}$ | $3.47 \times 10^{-22}$ | $2.28 \times 10^{-22}$ |

|                                      |                        |                        |                        |                        |                        |                        |
|--------------------------------------|------------------------|------------------------|------------------------|------------------------|------------------------|------------------------|
| $k'_{SA\_SA\_s}$                     | $3.93 \times 10^{-21}$ | $1.82 \times 10^{-21}$ | $1.01 \times 10^{-21}$ | $8.62 \times 10^{-12}$ | $4.42 \times 10^{-12}$ | $2.34 \times 10^{-12}$ |
| $\frac{\nu_{DSA\_WM}}{\nu_{SA\_SA}}$ | 3.04                   | 2.61                   | 2.30                   | 2.22                   | 1.85                   | 1.53                   |

1  $k_{DSA}$  is the rate constant for the  $SO_3 + H_2SO_4$  reaction;  $k'_{DSA\_WM\_o}$  and  $k'_{DSA\_WM\_s}$  are respectively the effective rate  
2 constants for  $H_2O$ -assisted  $SO_3 + H_2SO_4$  reaction occurring through one-step and stepwise routes.  $k'_{SA\_SA\_o}$  and  
3  $k'_{SA\_SA\_s}$  are respectively the effective rate constants for the hydrolysis reaction of  $SO_3$  with  $H_2SO_4$  occurring through  
4 one-step and stepwise routes.  $\nu_{DSA\_WM}/\nu_{SA\_SA}$  is the rate ratio between Channel DSA\_WM and Channel SA\_SA.

5

6 **Comment 2.**

7 While interesting, I'm not sure the BOMD simulations are saying much about the relevance of  
8  $H_2S_2O_7$  for actual new-particle formation:  $H_2S_2O_7$  formed in water droplets will presumably stay  
9 there, and never evaporate to participate in NPF. (Overall, "air-water interfaces" have little to do  
10 with actual NPF, as the interfaces are by definition found in particles that \*have already formed\*:  
11 many of the claims of "NPF-relevance" made in the study are thus by definition incorrect). While  
12 there may be some relevance of the studied process to particle growth, even  $H_2SO_4$  has an essentially  
13 zero evaporation rate from any particles larger than a few nanometers - so it may make little  
14 difference to the growth of larger aerosol whether the sulfur is taken up as  $H_2SO_4$  or  $H_2S_2O_7$  (also  
15 see issue 4 for a further caveat).

16 **Response:** Thanks for your valuable comments. We agree with the suggestion of the reviewer that  
17 the reaction of  $H_2S_2O_7$  or  $H_2SO_4$  formations at air-water interface is not directly related to new  
18 particle formation. However, the reaction of  $H_2S_2O_7$  or  $H_2SO_4$  formations at air-water interface is  
19 necessary to investigate by using BOMD simulations. This is because that

20 (a) Many investigations (*J. Am. Chem. Soc.*, 2016, 138, 1816-1819; *Proc. Natl. Acad. Sci.*  
21 *U.S.A*, 2017, 114, 12401-12406.; *J. Am. Chem. Soc.*, 2018, 140, 6456-6466.; *J. Am. Chem. Soc.*,  
22 2018, 140, 14, 4913-4921.; *Chem. Sci.*, 2019, 10, 743-751.; *Chem. Sci.*, 2017,8, 5385-5391.)  
23 suggest that interfacial environment not only triggers the arrangement and aggregation of  
24 hydrophilic groups, but also provides a good medium for many atmospheric reactions. Notably, due  
25 to the induction of proton transfer pathways by interfacial water molecules, many atmospheric  
26 reactions that occur on the surface of aerosols and droplets are faster, and sometimes are different  
27 from the corresponding processes in the gas phase. Based on this, the differences in the reactivity  
28 of  $SO_3$  with  $H_2SO_4$  in the gas phase and at the air-water interface were evaluated by using BOMD  
29 simulations.

1 (b) The BOMD simulation results at the air-water interface suggest that three different types  
2 of interfacial reaction mechanisms (i) H<sub>2</sub>O-induced the formation of S<sub>2</sub>O<sub>7</sub><sup>2-</sup>···H<sub>3</sub>O<sup>+</sup> ion pair; (ii)  
3 HSO<sub>4</sub><sup>-</sup> mediated the formation of HSO<sub>4</sub><sup>-</sup>···H<sub>3</sub>O<sup>+</sup> ion pair and (iii) the deprotonation of H<sub>2</sub>S<sub>2</sub>O<sub>7</sub> were  
4 observed. These interfacial reactions occurred through stepwise mechanism to form the ion pair of  
5 S<sub>2</sub>O<sub>7</sub><sup>2-</sup>···H<sub>3</sub>O<sup>+</sup> and HSO<sub>4</sub><sup>-</sup>···H<sub>3</sub>O<sup>+</sup>, and proceed on the picosecond time scale. These interfacial  
6 mechanisms are in contrast to the gas phase reaction mechanisms in which loop-structure  
7 mechanism were involved in SO<sub>3</sub> + H<sub>2</sub>SO<sub>4</sub> reaction without and with H<sub>2</sub>O. Thus, the SO<sub>3</sub> + H<sub>2</sub>SO<sub>4</sub>  
8 reaction behavior at the air-water interface is different from that of the gas phase, and some new and  
9 different mechanisms have been found.

10 (c) Although the formation routes of the S<sub>2</sub>O<sub>7</sub><sup>2-</sup>···H<sub>3</sub>O<sup>+</sup> and HSO<sub>4</sub><sup>-</sup>···H<sub>3</sub>O<sup>+</sup> ion pair at air-water  
11 interface is not directly related to new particle formation, the S<sub>2</sub>O<sub>7</sub><sup>2-</sup> ion at the air-water interface  
12 has stronger nucleation potential as the following reasons. One reason is that the interactions of  
13 S<sub>2</sub>O<sub>7</sub><sup>2-</sup>···H<sub>2</sub>SO<sub>4</sub>, S<sub>2</sub>O<sub>7</sub><sup>2-</sup>···HNO<sub>3</sub>, S<sub>2</sub>O<sub>7</sub><sup>2-</sup>···(COOH)<sub>2</sub>, H<sub>3</sub>O<sup>+</sup>···NH<sub>3</sub>, H<sub>3</sub>O<sup>+</sup>···H<sub>2</sub>SO<sub>4</sub>, SA<sup>-</sup>···H<sub>2</sub>SO<sub>4</sub>, SA<sup>-</sup>  
14 ···(COOH)<sub>2</sub>, and SA<sup>-</sup>···HNO<sub>3</sub> listed in Table 2 are stronger than those of H<sub>2</sub>SO<sub>4</sub>···NH<sub>3</sub> (major  
15 precursor of atmospheric aerosols). These results reveal that interfacial S<sub>2</sub>O<sub>7</sub><sup>2-</sup>, SA<sup>-</sup> and H<sub>3</sub>O<sup>+</sup> can  
16 attract candidate species from the gas phase to the water surface. The other reason is that as  
17 compared with (SA)<sub>1</sub>(A)<sub>1</sub>(X)<sub>1</sub> (X = HOOCCH<sub>2</sub>COOH, HOCCOOSO<sub>3</sub>H, CH<sub>3</sub>OSO<sub>3</sub>H,  
18 HOOCCH<sub>2</sub>CH(NH<sub>2</sub>)COOH and HOCH<sub>2</sub>COOH) clusters (Zhong et al., 2019; Zhang et al., 2018;  
19 Rong et al., 2020; Gao et al., 2023; Liu et al., 2021a; Zhang et al., 2017), the number of hydrogen  
20 bonds in (SA)<sub>1</sub>(A)<sub>1</sub>(S<sub>2</sub>O<sub>7</sub><sup>2-</sup>)<sub>1</sub> cluster presented in Fig. S8 increased and the ring of the complex was  
21 enlarged. Meanwhile, comparing to (SA)<sub>1</sub>(A)<sub>1</sub>(X)<sub>1</sub> (X = HOOCCH<sub>2</sub>COOH, HOCCOOSO<sub>3</sub>H,  
22 CH<sub>3</sub>OSO<sub>3</sub>H, HOOCCH<sub>2</sub>CH(NH<sub>2</sub>)COOH and HOCH<sub>2</sub>COOH) clusters (Table 2), the Gibbs  
23 formation free energy ΔG of (SA)<sub>1</sub>(A)<sub>1</sub>(S<sub>2</sub>O<sub>7</sub><sup>2-</sup>)<sub>1</sub> cluster is lower, showing S<sub>2</sub>O<sub>7</sub><sup>2-</sup> ion at the air-water  
24 interface has stronger nucleation ability than X in the gas phase. Based on this, the sentence of “**and**  
25 **thus in turn accelerates the growth of particle.**” has been deleted in Line 14 Page 14 of the revised  
26 manuscript. Similarly, the sentence of “**enhancing potential of S<sub>2</sub>O<sub>7</sub><sup>2-</sup> on SA-A cluster**” has been  
27 changed as “**the nucleation potential of S<sub>2</sub>O<sub>7</sub><sup>2-</sup> on SA-A cluster**” in Line 15 Page 16 of the revised  
28 manuscript. Moreover, the sentence of “**the Gibbs formation free energy ΔG of (SA)<sub>1</sub>(A)<sub>1</sub>(S<sub>2</sub>O<sub>7</sub><sup>2-</sup>)<sub>1</sub>**  
29 **cluster is lower. Therefore, we predict that S<sub>2</sub>O<sub>7</sub><sup>2-</sup> at the air-water interface has important implication**  
30 **to the aerosol NPF in highly industrial polluted regions with high concentrations of SO<sub>3</sub>.**” has been

1 changed as “the Gibbs formation free energy  $\Delta G$  of  $(SA)_1(A)_1(S_2O_7^{2-})_1$  cluster is lower, showing  
2  $S_2O_7^{2-}$  ion at the air-water interface has stronger nucleation ability than  $X$  in the gas phase. Therefore,  
3 we predict that  $S_2O_7^{2-}$  at the air-water interface has stronger nucleation potential.” in Lines 23-26  
4 Page 16 of the revised manuscript.

5 Overall, the BOMD simulations of three different types of interfacial reaction mechanisms (*i*)  
6  $H_2O$ -induced the formation of  $S_2O_7^{2-}\cdots H_3O^+$  ion pair; (*ii*)  $HSO_4^-$  mediated the formation of  $HSO_4^-$   
7  $\cdots H_3O^+$  ion pair and (*iii*) the deprotonation of  $H_2S_2O_7$  were studied. These interfacial reactions  
8 occurred through stepwise mechanism and were in contrast to the gas phase reaction mechanisms  
9 in which loop-structure mechanism were involved in  $SO_3 + H_2SO_4$  reaction without and with  $H_2O$ .  
10 Then, the nucleation potential of  $S_2O_7^{2-}$  at the air-water interface has been investigated by  
11 considering the adsorption capacity of the  $S_2O_7^{2-}$ ,  $H_3O^+$  and  $SA^-$  to gaseous precursors in the  
12 atmosphere as well as the geometrical structure and the formation free energies of the  
13  $(SA)_1(A)_1(S_2O_7^{2-})_1$  clusters.

### 14 15 **Comment 3.**

16 The authors spend much time discussing the results they obtain for the “enhancement factor”  $R$   
17 (equation 5). As cautioned in Elm et al. (<https://www.sciencedirect.com/science/article/abs/pii/S0021850220301099>), the excessive use of such abstract “enhancement factors” is  
18 questionable and risky. In this particular case, I don’t believe the results are actually technically  
19 badly wrong - for example including the effect of  $H_2SO_4$  depletion (caused by a fraction of the  $SO_3$   
20 forming DSA rather than  $H_2SO_4$ ) would probably not change the qualitative results, as the clustering  
21 ability of DSA is much greater than that of  $H_2SO_4$ . (For completeness sake, I would nevertheless  
22 recommend this is done). However, many of the presented “results” are in reality rather trivial  
23 consequence of how the simulation is set up, and the parameters defined. For example, the  $R$  values  
24 are quite obviously “greater than or equal to 1”, as the  $J$  values with added DSA cannot (in the way  
25 the authors run ACDC) be lower than the  $J$  values without the added DSA. Similarly, the various  
26 correlations between  $R$  and different parameters are not particularly informative or novel. I  
27 recommend the authors first of all account for all relevant effects (including sulfur depletion - ie run  
28 the code with a constant  $SO_3$  source rather than constant  $[H_2SO_4]$ ), and also condense the discussion  
29 on “enhancement factors”.  
30



1 **Response:** Thanks for your valuable comments. The reason for using a constant SO<sub>3</sub> source is not  
2 reasonable has been explained firstly. Meanwhile, the corresponding discussion on “enhancement  
3 factors” have been condensed and the analysis of the absolute formation rate with temperature and  
4 concentration changes after the addition of H<sub>2</sub>S<sub>2</sub>O<sub>7</sub> has been added. The corresponding major  
5 revision has been made as follows.

6 (a) It is not reasonable to use a constant SO<sub>3</sub> source since there are many pathways for the  
7 removal of SO<sub>3</sub> removal processes. the hydrolysis of SO<sub>3</sub> to product H<sub>2</sub>SO<sub>4</sub> is the most major loss  
8 route of SO<sub>3</sub> in the atmosphere. As a complement to the loss of SO<sub>3</sub>, ammonolysis reaction of SO<sub>3</sub>  
9 in polluted areas of NH<sub>3</sub> can form H<sub>2</sub>NSO<sub>3</sub>H, which can be competitive with the formation of H<sub>2</sub>SO<sub>4</sub>  
10 from the hydrolysis reaction of SO<sub>3</sub>. Besides, the reactions of SO<sub>3</sub> with CH<sub>3</sub>OH, HNO<sub>3</sub>, and organic  
11 acids (e.g., formic acid, acetic acid and acrylic acid). These reactions consume some SO<sub>3</sub> in the  
12 atmosphere and inhibit the hydrolysis of SO<sub>3</sub> (H<sub>2</sub>SO<sub>4</sub> formation) to some extent. Thus, it is not  
13 suitable to use a constant source of SO<sub>3</sub>.

14 The concentration of H<sub>2</sub>S<sub>2</sub>O<sub>7</sub> has been re-evaluated within the altitude range of 0-30 km. Then,  
15 the analysis of the absolute formation rate with temperature and concentration changes after the  
16 addition of H<sub>2</sub>S<sub>2</sub>O<sub>7</sub> has been added in Lines 28-30 Page 14 to Lines 1-13 Page 15 of the revised  
17 manuscript, which has been organized as “The potential enhancement influence of DSA to the SA-  
18 A-based particle formation was shown in Fig. 6. The formation rate ( $J$ , cm<sup>-3</sup>·s<sup>-1</sup>) of SA-A-DSA-  
19 based system illustrated in Fig. 6 was negatively dependent on temperature, demonstrating that the  
20 low temperature is a key factor to accelerate cluster formation. It is noted that, at low temperatures  
21 of 218.15 K (Fig. S12) and 238.15 K (Fig. S13), the actual  $\Delta G$  of clusters has been calculated to  
22 ensure meaningful cluster dynamics of the 3 × 3 systems, where the actual  $\Delta G$  surface represented  
23 that the simulated set of clusters always included the critical cluster. In addition to temperature, the  
24  $J$  of SA-A-DSA-based system shown in Fig. 6 rise with the increase of [DSA]. More notably, the  
25 participation of DSA can promote  $J$  to a higher level, indicating its enhancement on SA-A  
26 nucleation. Besides, there was significantly positive dependence of the  $J$  of SA-A-DSA-based  
27 system on both [SA] and [A] in Fig. 7 (238.15 K) and Fig. S15-Fig. S18 (218.15, 258.15, 278.15  
28 and 298.15 K). This was because the higher concentration of nucleation precursors could lead to  
29 higher  $J$ . Besides, Fig. S19 showed the nucleation rate when the sum ([SA] + [DSA]) was kept  
30 constant.  $J_{\text{DSA/SA}}$  at substituted condition was higher than that at unsubstituted condition. These

1 results indicated that DSA may can greatly enhance the SA-A particle nucleation in heavy sulfur  
2 oxide polluted atmospheric boundary layer, especially at an average flight altitude of 10 km with  
3 high [DSA].”

4

#### 5 **Comment 4**

6 The most problematic part of the overall claim for atmospheric relevance is the neglect of H<sub>2</sub>S<sub>2</sub>O<sub>7</sub>  
7 decomposition by hydration (i.e. the H<sub>2</sub>S<sub>2</sub>O<sub>7</sub> + H<sub>2</sub>O ⇒ H<sub>2</sub>SO<sub>4</sub> + H<sub>2</sub>SO<sub>4</sub> reaction), which is very  
8 well known (e.g. from industrial sulfur chemistry) to be rapid and spontaneous. (Indeed, H<sub>2</sub>S<sub>2</sub>O<sub>7</sub> is  
9 one of the strongest dehydrating agents in the known universe - its hydration reaction is so strong  
10 and favourable that it can even extract water molecules from sugar.) The BOMD simulations  
11 indicate that H<sub>2</sub>S<sub>2</sub>O<sub>7</sub> is stable for 10 picoseconds - but this is nowhere near enough time for a H<sub>2</sub>S<sub>2</sub>O<sub>7</sub>  
12 to, for example, collide with a H<sub>2</sub>SO<sub>4</sub> (timescale: seconds) in the gas phase (and thus participate in  
13 NPF). Recently, another group showed that preliminary results on the role of sulfamic acid in new-  
14 particle formation are invalidated by rapid hydrolysis ([https://pubs.acs.org/doi/full/10.1021/acs.jpca.](https://pubs.acs.org/doi/full/10.1021/acs.jpca.3c04982)  
15 [3c04982](https://pubs.acs.org/doi/full/10.1021/acs.jpca.3c04982)) - I anticipate something very similar may end up being the case for di/pyrosulfuric acid  
16 in the Earth’s lower atmosphere. Having said that, the presented results may very well have  
17 relevance for stratospheric chemistry, as well as for cloud chemistry on Venus (where there is much  
18 less water, and much more H<sub>2</sub>SO<sub>4</sub>). I recommend the atmospheric implications and relevance  
19 discussion be reformulated to target the appropriate atmospheres /or regions of them. Or at the very  
20 least, the possible (even likely) rapid hydrolysis of H<sub>2</sub>S<sub>2</sub>O<sub>7</sub> should be mentioned as a major caveat  
21 of the results (and as a strongly recommended subject for follow-up studies!)

22 **Response:** Thanks for your valuable comments. According to the reviewer’s suggestion, the  
23 importance of the SO<sub>3</sub> + H<sub>2</sub>SO<sub>4</sub> reaction has been investigated in the atmospheres of Earth and Venus.  
24 Meanwhile, the concentration of H<sub>2</sub>S<sub>2</sub>O<sub>7</sub> has been re-evaluated where the end and outside the  
25 aircraft engine and flight was considered. The corresponding revision has been made as follows.

26 (a) To understand the competition between the SO<sub>3</sub> + H<sub>2</sub>SO<sub>4</sub> reaction and H<sub>2</sub>O-assisted  
27 hydrolysis of SO<sub>3</sub> in the Earth’s atmosphere, the rate ratio (v<sub>DSA</sub>/v<sub>SA</sub>) between the SO<sub>3</sub> + H<sub>2</sub>SO<sub>4</sub>  
28 reaction and H<sub>2</sub>O-assisted hydrolysis of SO<sub>3</sub> has been calculated and was expressed in Eq. (5).

29 
$$\frac{v_{\text{DSA}}}{v_{\text{SA}}} = \frac{k_{\text{DSA}} \times [\text{SO}_3] \times [\text{H}_2\text{SO}_4] + k_{\text{DSA\_WM\_s}} \times K_{\text{eq1}} \times [\text{SO}_3] \times [\text{H}_2\text{SO}_4] \times [\text{H}_2\text{O}]}{k_{\text{SA\_WM}} \times K_{\text{eq2}} \times [\text{SO}_3] \times [\text{H}_2\text{O}] \times [\text{H}_2\text{O}]} \quad (5)$$

1 In Eq. (5),  $K_{eq1}$  and  $K_{eq2}$  were the equilibrium constant for the formation of  $H_2SO_4 \cdots H_2O$  and  
2  $SO_3 \cdots H_2O$  complexes shown in Table S2, respectively;  $k_{DSA}$ ,  $k_{DSA\_WM\_s}$  and  $k_{SA\_WM}$  were  
3 respectively denoted the bimolecular rate coefficient for the  $H_2SO_4 + SO_3$ ,  $H_2SO_4 \cdots H_2O + SO_3$  and  
4  $SO_3 \cdots H_2O + H_2O$  reactions;  $[H_2O]$  and  $[H_2SO_4]$  were respectively represented the concentration of  
5  $H_2O$  and  $H_2SO_4$  taken from references (*J. Phys. Chem. A*, 2013, 117, 10381-10396.; *Environ. Sci.*  
6 *Technol.*, 2015, 49, 13112-13120.). The corresponding rate ratio have been listed in Table S7 (0 km  
7 altitude) and S8 (5-30 km altitude). As seen in Table S7, at 0 km altitude, the hydrolysis reaction of  
8  $SO_3$  with  $(H_2O)_2$  is more favorable than the  $SO_3 + H_2SO_4$  reaction as the  $[H_2O]$  ( $10^{16}$ - $10^{18}$   
9  $molecules \cdot cm^3$ ) is much larger than that of  $[H_2SO_4]$  ( $10^4$ - $10^8$   $molecules \cdot cm^3$ ). Although the  
10 concentration of water molecules decreases with the increase of altitude in Table S8, the  
11 concentration of  $[H_2O]$  is still much greater than that of  $[H_2SO_4]$ , resulting in the  $SO_3 + H_2SO_4$   
12 reaction cannot compete with  $H_2O$ -assisted hydrolysis of  $SO_3$  within the altitude range of 5-30 km.  
13 Moreover, the  $SO_3 + H_2SO_4$  reaction is not also the major sink route of  $SO_3$ , even considering of  
14 high  $H_2SO_4$  concentration at the end and outside the aircraft engine and flight. Based on this, the  
15 sentence of “The value of  $v_{DSA}/v_{SA}$  was listed in Table S7 (0 km altitude) and S8 (5-30 km altitude).  
16 As seen in Table S7, at 0 km altitude, the hydrolysis reaction of  $SO_3$  with  $(H_2O)_2$  is more favorable  
17 than the  $SO_3 + H_2SO_4$  reaction as the  $[H_2O]$  ( $10^{16}$ - $10^{18}$   $molecules \cdot cm^3$ ) is much larger than that of  
18  $[H_2SO_4]$  ( $10^4$ - $10^8$   $molecules \cdot cm^3$ ). Although the concentration of water molecules decreases with  
19 the increase of altitude in Table S8, the concentration of  $[H_2O]$  is still much greater than that of  
20  $[H_2SO_4]$ , resulting in the  $SO_3 + H_2SO_4$  reaction cannot compete with  $H_2O$ -assisted hydrolysis of  
21  $SO_3$  within the altitude range of 5-30 km. Even considering of high  $H_2SO_4$  concentration at the end  
22 and outside the aircraft engine and flight at 10 km, the  $SO_3 + H_2SO_4$  reaction is not also the major  
23 sink route of  $SO_3$ .” has been added in Lines 24-29 Page 13 to Lines 1-4 Page 14 of the revised  
24 manuscript.

25 (b) It has been proposed that the concentration of sulfuric acid is even greater than that of water  
26 vapor in the atmosphere of Venus (*Science*, 1990, 249, 1273.; *Planet. Space Sci.*, 2006, 54, 1352.;  
27 *Icarus*, 1994, 109, 58.; *Nat. Geosci.*, 2010, 3, 834.), which may lead to that the  $SO_3 + H_2SO_4$  reaction  
28 is probably favorable than the  $H_2O$ -assisted hydrolysis of  $SO_3$  in the Venus’ atmosphere. To check  
29 whether the  $SO_3 + H_2SO_4$  reaction is more favorable than  $H_2O$ -assisted hydrolysis of  $SO_3$  or not in  
30 the Venus’ atmosphere, the rate ratio of  $v_{DSA}/v_{SA}$  listed in Eq. 4 has been calculated in Table 2. It

1 can be seen from Table 2 that the rate ratio of  $v_{\text{DSA}}/v_{\text{SA}}$  is  $3.24 \times 10^8$ - $5.23 \times 10^{10}$  in the 40-70 km  
2 altitude range of Venus, which indicates that the  $\text{SO}_3 + \text{H}_2\text{SO}_4$  reaction is significantly more  
3 favorable than the hydrolysis reaction of  $\text{SO}_3 + (\text{H}_2\text{O})_2$  within the altitudes range of 40-70 km in the  
4 Venus' atmosphere. Based on this, the sentence of “Notably, as the concentration of sulfuric acid is  
5 even greater than that of water vapor in the atmosphere of Venus, the  $\text{SO}_3 + \text{SA}$  reaction is probably  
6 favorable than the  $\text{H}_2\text{O}$ -assisted hydrolysis of  $\text{SO}_3$  in the Venus' atmosphere. To check whether the  
7  $\text{SO}_3 + \text{H}_2\text{SO}_4$  reaction is more favorable than  $\text{H}_2\text{O}$ -assisted hydrolysis of  $\text{SO}_3$  or not in the Venus'  
8 atmosphere, the rate ratio of  $v_{\text{DSA}}/v_{\text{SA}}$  listed in Eq. 4 has been calculated in Table 2. It can be seen  
9 from Table 2 that the rate ratio of  $v_{\text{DSA}}/v_{\text{SA}}$  is  $3.24 \times 10^8$ - $5.23 \times 10^{10}$  in the 40-70 km altitude range  
10 of Venus, which indicates that the  $\text{SO}_3 + \text{H}_2\text{SO}_4$  reaction is significantly more favorable than the  
11 hydrolysis reaction of  $\text{SO}_3 + (\text{H}_2\text{O})_2$  within the altitudes range of 40-70 km in the Venus' atmosphere.”  
12 has been added in Lines 4-11 Page 14 of the revised manuscript.

13 (c) Considering the concentration of sulfuric acid at the end and outside the aircraft engine and  
14 flight (up to 600 pptv), the concentration of  $\text{H}_2\text{S}_2\text{O}_7$  has been re-evaluated within the altitude range  
15 of 0-30 km. Specifically, the steady-state concentration of DSA was calculated using the calculated  
16 equilibrium constant listed in Eq. S5.

$$17 \quad K_{\text{eq}3} = \frac{[\text{DSA}]}{[\text{SO}_3][\text{SA}]} \quad (\text{S5})$$

18 where  $K_{\text{eq}3}$  is the equilibrium constant of DSA with respect to  $\text{SO}_3$  and  $\text{H}_2\text{SO}_4$  within the altitude  
19 range of 0-30 km shown in Table S9;  $[\text{SO}_3]$ ,  $[\text{SA}]$  and  $[\text{DSA}]$  are the concentrations of  $\text{SO}_3$ ,  $\text{H}_2\text{SO}_4$ ,  
20 and  $\text{H}_2\text{S}_2\text{O}_7$ , respectively. Although the concentration of sulfur trioxide remains unknown at  
21 different altitudes, experimental observations have shown that the concentration of sulfur trioxide  
22 can reach  $10^6$  molecules  $\text{cm}^{-3}$  in the troposphere. Moreover, water vapor concentrations significantly  
23 decrease with increasing of altitude. Consequently, the concentration of sulfur trioxide should be  
24 higher in the stratosphere than in the troposphere, and its concentration would increase as a result  
25 of geoengineered injection of  $\text{SO}_2$  or  $\text{SO}_3$ . Besides, it is worth noting that  $\text{H}_2\text{SO}_4$  can form at the  
26 end and outside the engine, and flight measurements in the exhaust plume have measured sulfuric  
27 acid abundances up to a value of 600 pptv. When an average flight altitude of 10 km is considered,  
28 this corresponds to a concentration of  $5.1 \times 10^9$  molecules  $\cdot \text{cm}^{-3}$ . Therefore, we have calculated the  
29 concentrations of DSA according to concentrations of sulfur trioxide in the range from  $10^7$  to  $10^{14}$

1 molecules  $\text{cm}^{-3}$  and the concentrations of  $\text{H}_2\text{SO}_4$  in the range of  $10^4$ - $10^9$  molecules  $\text{cm}^{-3}$  as shown  
2 in Fig. S9.

3 The maximum concentration of DSA displayed in Fig. S9 can be up to  $10^8$  molecules  $\cdot \text{cm}^{-3}$ .  
4 However, it should be noted that the concentration of water in the troposphere is abundant, and DSA  
5 is easily hydrolyzed to form  $\text{H}_2\text{SO}_4$ . Based on this, the concentration of DSA listed in Fig. S9 was  
6 overestimated. However, the extent and proportion of DSA hydrolysis remains unclear, and the  
7 hydrolysis behavior of DSA needs to be further investigated in subsequent studies. Therefore, the  
8 maximum concentration of DSA ( $10^8$  molecules  $\cdot \text{cm}^{-3}$ ) was not included in the effect of  $\text{H}_2\text{S}_2\text{O}_7$ , the  
9 product of the reaction between  $\text{SO}_3$  and  $\text{H}_2\text{SO}_4$ , on new particle formation (NPF) in various  
10 environments by using the Atmospheric Cluster Dynamics Code kinetic model and the QC  
11 calculation. In Lines 27-29 Page 7 to Lines 1-2 Page 8 of the revised manuscript, the discussion of  
12 the DSA concentration has been added as “As the prediction in Table S7, the concentration of DSA  
13 is set to  $10^4$ - $10^8$  molecules  $\cdot \text{cm}^{-3}$ . However, DSA is easily hydrolyzed with abundant water in the  
14 troposphere to form  $\text{H}_2\text{SO}_4$ , the concentration of DSA listed in Fig. S9 was overestimated. So, the  
15 maximum concentration of DSA ( $10^8$  molecules  $\cdot \text{cm}^{-3}$ ) was not included in the effect of  $\text{H}_2\text{S}_2\text{O}_7$  on  
16 new particle formation (NPF) in various environments.”

17 Overall, the  $\text{SO}_3 + \text{SA}$  reaction cannot compete with  $\text{H}_2\text{O}$ -assisted hydrolysis of  $\text{SO}_3$  within the  
18 altitude range of 0-30 km in the Earth's atmosphere, even considering of high  $\text{H}_2\text{SO}_4$  concentration  
19 at the end and outside the aircraft engine and flight. However, the  $\text{SO}_3 + \text{SA}$  reaction is significantly  
20 more favorable than the hydrolysis reaction of  $\text{SO}_3 + (\text{H}_2\text{O})_2$  within the altitude range of 40-70 km  
21 in Venus' atmosphere. Moreover, as the extent and proportion of DSA hydrolysis is unclear, the  
22 maximum concentration of DSA ( $10^8$  molecules  $\cdot \text{cm}^{-3}$ ) was not included in the effect of  $\text{H}_2\text{S}_2\text{O}_7$  on  
23 new particle formation (NPF) in various environments by using the Atmospheric Cluster Dynamics  
24 Code kinetic model and the QC calculation.

25

#### 26 **Comment 5.**

27 Another issue to consider is the timescale associated with participation in NPF of compounds with  
28 mixing ratios well below a part per quadrillion. The gas-kinetic bimolecular collision rate for small  
29 molecules and their clusters is around  $1\text{E}-10$ ... $1\text{E}-9$   $\text{cm}^3$  per molecule and second. If the DSA  
30 concentration is 1 molecule per  $\text{cm}^3$ , then on average a  $\text{H}_2\text{SO}_4$  molecule, or a  $\text{H}_2\text{SO}_4$ -containing

1 cluster, will thus collide with DSA molecules about once per 1E9 seconds or so (as the pseudo-  
2 unimolecular collision rate is  $k_{\text{coll}}$  times the concentration, and the lifetime with respect to  
3 collisions is the inverse of this). This is more than 30 YEARS. Even for a DSA concentration of 10  
4 per  $\text{cm}^3$ , the timescale of a given molecule or cluster colliding with a DSA molecule is more than 3  
5 YEARS. Or for 100 per  $\text{cm}^3$ , more than 3 months. It is quite clear from this that the pseudo-steady-  
6 state assumed by ACDC simulations will simply never have time to form, when some of the  
7 participating molecules have such low concentrations. Or in other words, the basic assumptions  
8 required for modelling clustering with ACDC do not apply in these cases (or, to put it yet another  
9 way, an ACDC - type code needs to be run in a very different way, explicitly accounting for these  
10 timescales).

11 **Response:** Thanks for your valuable comments. We agree with the reviewer that at some of the  
12 participating molecules such low concentrations that the pseudo-steady-state assumed by ACDC  
13 simulations will simply never have time to form. Based on this, Considering the concentration of  
14 sulfuric acid at the end and outside the aircraft engine and flight (up to 600 pptv), the concentration  
15 of  $\text{H}_2\text{S}_2\text{O}_7$  has been re-evaluated within the altitude range of 0-30 km. Specifically, the steady-state  
16 concentration of DSA was calculated using the calculated equilibrium constant listed in Eq. S5.

$$17 \quad K_{\text{eq}3} = \frac{[\text{DSA}]}{[\text{SO}_3][\text{SA}]} \quad (\text{S5})$$

18 where  $K_{\text{eq}3}$  is the equilibrium constant of DSA with respect to  $\text{SO}_3$  and  $\text{H}_2\text{SO}_4$  within the altitude  
19 range of 0-30 km shown in Table S9;  $[\text{SO}_3]$ ,  $[\text{SA}]$  and  $[\text{DSA}]$  are the concentrations of  $\text{SO}_3$ ,  $\text{H}_2\text{SO}_4$ ,  
20 and  $\text{H}_2\text{S}_2\text{O}_7$ , respectively. Although the concentration of sulfur trioxide remains unknown at  
21 different altitudes, experimental observations have shown that the concentration of sulfur trioxide  
22 can reach  $10^6$  molecules  $\text{cm}^{-3}$  in the troposphere. Moreover, water vapor concentrations significantly  
23 decrease with increasing of altitude. Consequently, the concentration of sulfur trioxide should be  
24 higher in the stratosphere than in the troposphere, and its concentration would increase as a result  
25 of geoengineered injection of  $\text{SO}_2$  or  $\text{SO}_3$ . Besides, it is worth noting that  $\text{H}_2\text{SO}_4$  can form at the  
26 end and outside the engine, and flight measurements in the exhaust plume have measured sulfuric  
27 acid abundances up to a value of 600 pptv. When an average flight altitude of 10 km is considered,  
28 this corresponds to a concentration of  $5.1 \times 10^9$  molecules  $\cdot \text{cm}^{-3}$ . Therefore, we have calculated the  
29 concentrations of DSA according to concentrations of sulfur trioxide in the range from  $10^7$  to  $10^{14}$

1 molecules  $\text{cm}^{-3}$  and the concentrations of  $\text{H}_2\text{SO}_4$  in the range of  $10^4$ - $10^9$  molecules  $\text{cm}^{-3}$  as shown  
2 in Fig. S9.

3 The maximum concentration of DSA displayed in Fig. S9 can be up to  $10^8$  molecules  $\cdot \text{cm}^{-3}$ .

4 However, it should be noted that the concentration of water in the troposphere is abundant, and  
5 DSA is easily hydrolyzed to form  $\text{H}_2\text{SO}_4$ . Based on this, the concentration of DSA listed in Fig. S9  
6 was overestimated. The extent and proportion of DSA hydrolysis remains unclear, and the  
7 hydrolysis behavior of DSA needs to be further investigated in subsequent studies. Therefore, the  
8 maximum concentration of DSA ( $10^8$  molecules  $\cdot \text{cm}^{-3}$ ) was not included in the effect of  $\text{H}_2\text{S}_2\text{O}_7$ ,  
9 the product of the reaction between  $\text{SO}_3$  and  $\text{H}_2\text{SO}_4$ , on new particle formation (NPF) in various  
10 environments by using the Atmospheric Cluster Dynamics Code kinetic model and the QC

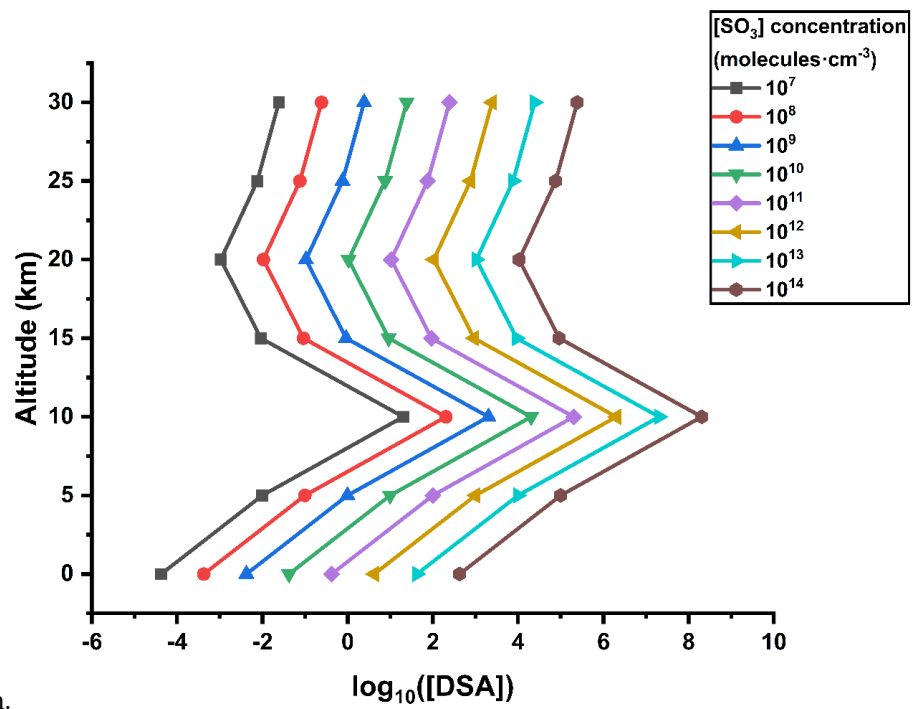

11 calculation.

12 **Fig. S9** Concentration (unit: molecules  $\cdot \text{cm}^{-3}$ ) of DSA with respect to different concentrations of  $\text{SO}_3$   
13 as function of altitude. We consider the possible concentrations of  $\text{SO}_3$  with the injection of  $\text{SO}_3$ .

14  
15 The maximum concentration of DSA displayed in Fig. S9 can be up to  $10^8$  molecules  $\cdot \text{cm}^{-3}$ .  
16 However, it should be noted that the concentration of water in the troposphere is abundant, and DSA  
17 is easily hydrolyzed to form  $\text{H}_2\text{SO}_4$ . Based on this, the concentration of DSA listed in Fig. S9 was  
18 overestimated. The extent and proportion of DSA hydrolysis remains unclear, and the hydrolysis  
19 behavior of DSA needs to be further investigated in subsequent studies. Therefore, the maximum  
20 concentration of DSA ( $10^8$  molecules  $\cdot \text{cm}^{-3}$ ) was not included in the effect of  $\text{H}_2\text{S}_2\text{O}_7$ , the product of

1 the reaction between SO<sub>3</sub> and H<sub>2</sub>SO<sub>4</sub>, on new particle formation (NPF) in various environments by  
2 using the Atmospheric Cluster Dynamics Code kinetic model and the QC calculation.

#### 3 4 **Technical issues**

##### 5 **Comment 6.**

6 The kinetic approach used here seems quite elaborate, given that the authors are not actually treating  
7 (or at least not discussing) any sort of pressure dependence, non-thermalisation, etc. How different  
8 are the rates compared to what one would obtain using a simple transition state theory framework  
9 (plus assuming kinetic gas theory forward rates for the initial complex formation)? I'm not  
10 criticising the use of elaborate methods as such, I'm just trying to assess how much difference they  
11 make, compared to a much simpler approach.

12 **Response:** Thanks for your valuable comments. The Rice-Ramsperger-Kassel-Marcus based  
13 Master Equation (ME/RRKM) model is well suited to calculate the kinetics of the SO<sub>3</sub> + H<sub>2</sub>SO<sub>4</sub>  
14 reaction without and with H<sub>2</sub>O. Specifically, as for the SO<sub>3</sub> + H<sub>2</sub>SO<sub>4</sub> → H<sub>2</sub>S<sub>2</sub>O<sub>7</sub> reaction without  
15 and with H<sub>2</sub>O illustrated in Fig. 1, the reaction without H<sub>2</sub>O has only a barrier height of 2.3 kcal·mol<sup>-1</sup>  
16 to produce the formation of H<sub>2</sub>S<sub>2</sub>O<sub>7</sub>, while the reaction with H<sub>2</sub>O only has a lower barrier height  
17 of 0.5 kcal·mol<sup>-1</sup>. It is reported that the ME/RRKM model has been used widely to calculate the rate  
18 constants of many gas phase reactions (*J. Am. Chem. Soc.*, 2022, 144, 19910-19920.; *J. Am. Chem.*  
19 *Soc.*, 2022, 144, 20, 9172-9177.; *Phys. Chem. Chem. Phys.*, 2022, 24, 18205-18216.; *Phys. Chem.*  
20 *Chem. Phys.*, 2022, 24, 4966-4977.; *J. Phys. Chem. A*, 2019, 123, 3131-3141.; *Chem. Phys. Lett.*,  
21 2020, 742, 137157.) where the rate constants for barrierless or near barrierless bimolecular reactions  
22 were evaluated reliably. In this case, the pre-equilibrium approximation used in our calculation is  
23 truly obsolete and may not be appropriate.

24 Meanwhile, to check the reliability of Master Equation (ME/RRKM) model, the rate constants  
25 for the SO<sub>3</sub> + H<sub>2</sub>SO<sub>4</sub> reaction without and with H<sub>2</sub>O were also calculated by using transition state  
26 theory (TST) coupled with the pre-equilibrium approximation. As seen in Table S6, the rate  
27 constants for the SO<sub>3</sub> + H<sub>2</sub>SO<sub>4</sub> reaction without and with H<sub>2</sub>O by using transition state theory is  
28 significantly higher than the gas kinetic limit. In addition, as for the rate constants calculated by  
29 transition state theory (TST) coupled with the pre-equilibrium approximation, the rate constants for  
30 the SO<sub>3</sub> + H<sub>2</sub>SO<sub>4</sub> reaction without and with H<sub>2</sub>O showed appreciably high negative temperature



1 dependence making the rate constants even larger at lower temperatures. This reveals that the TST  
 2 coupled with pre-equilibrium approximation used in our calculation is truly obsolete and may not  
 3 be appropriate. Thus, Using the Master Equation/Rice-Ramsperger-Kassel-Marcus (ME/RRKM)  
 4 models, the kinetic calculations for the SO<sub>3</sub> + H<sub>2</sub>SO<sub>4</sub> reaction without and with H<sub>2</sub>O were performed  
 5 by Barts-Widom method in the MESMER program package (Master Equation Solver for Multi-  
 6 Energy Well Reactions).

7 **Table S6** The rate constant (cm<sup>3</sup>·molecule<sup>-1</sup>·s<sup>-1</sup>) for the SO<sub>3</sub> + H<sub>2</sub>SO<sub>4</sub> reaction for the SO<sub>3</sub> + H<sub>2</sub>SO<sub>4</sub>  
 8 reaction without and with H<sub>2</sub>O within the temperature range of 280-320 K by using transition state  
 9 theory

| <i>T</i> /(K)                 | 280 K                   | 290 K                   | 298 K                   | 300 K                   | 310 K                   | 320 K                    |
|-------------------------------|-------------------------|-------------------------|-------------------------|-------------------------|-------------------------|--------------------------|
| <i>k</i> <sub>DSA</sub>       | 8.98 × 10 <sup>-9</sup> | 4.38 × 10 <sup>-9</sup> | 2.56 × 10 <sup>-9</sup> | 2.25 × 10 <sup>-9</sup> | 1.20 × 10 <sup>-9</sup> | 6.72 × 10 <sup>-10</sup> |
| <i>k'</i> <sub>DSA_WM_o</sub> | 5.77 × 10 <sup>-8</sup> | 2.59 × 10 <sup>-8</sup> | 1.42 × 10 <sup>-8</sup> | 1.23 × 10 <sup>-8</sup> | 6.12 × 10 <sup>-9</sup> | 3.18 × 10 <sup>-9</sup>  |
| <i>k'</i> <sub>DSA_WM_s</sub> | 5.20 × 10 <sup>-5</sup> | 2.44 × 10 <sup>-5</sup> | 1.39 × 10 <sup>-5</sup> | 1.21 × 10 <sup>-5</sup> | 6.29 × 10 <sup>-6</sup> | 3.42 × 10 <sup>-6</sup>  |

10 *k*<sub>DSA</sub> is the rate constant for the SO<sub>3</sub> + H<sub>2</sub>SO<sub>4</sub> reaction; *k*<sub>DSA\_WM\_o</sub> and *k*<sub>DSA\_WM\_s</sub> are respectively the rate constants  
 11 for H<sub>2</sub>O-assisted SO<sub>3</sub> + H<sub>2</sub>SO<sub>4</sub> reaction occurring through one-step and stepwise routes.

12  
 13 **Comment 7**

14 The method references for M06-2X, CCSD(T)-F12, and the ORCA program are not correct - the  
 15 first is completely wrong, while the latter refer to studies which have also used these approaches.  
 16 Please refer to the actual publications introducing the methods/codes instead.

17 **Response:** Thanks for your valuable comments. We are very sorry for using wrong references for  
 18 M06-2X, CCSD(T)-F12, and the ORCA program. The references regarding for the M06-2X,  
 19 CCSD(T)-F12 and the ORCA program has been respectively made as follows.

20 (a) As for M06-2X method, the correct references have been recited which has been organized  
 21 as references (Zhao and Truhlar, 2008; Elm et al., 2012).

22 [1] Zhao, Y., and Truhlar, D. G.: The M06 suite of density functionals for main group  
 23 thermochemistry, thermochemical kinetics, noncovalent interactions, excited states, and transition  
 24 elements: two new functionals and systematic testing of four M06-class functionals and 12 other  
 25 functionals, *Theor. Chem. Acc.*, 120, 215-241, 2008.;

26 [2] Elm, J., Bilde, M., and Mikkelsen, K. V.: Assessment of density functional theory in  
 27 predicting structures and free energies of reaction of atmospheric prenucleation clusters, *J. Chem.*  
 28 *Theory Comput.*, 8, 2071-2077, 2012.

1 (b) Regarding for CCSD(T)-F12 method, the relevant references have been changed which has  
2 been organized as references (Adler et al., 2007; Knizia et al., 2009).

3 [1] Adler, T. B., Knizia, G., and Werner, H. J.: A simple and efficient CCSD(T)-F12  
4 approximation, *J. Chem. Phys.*, 127, 221106, 10.1063/1.2817618, 2007.

5 [2] Knizia, G., Adler, T. B., and Werner, H.-J.: Simplified CCSD(T)-F12 methods: Theory and  
6 benchmarks, *J. Chem. Phys.*, 130, 054104, 10.1063/1.3054300, 2009.

7 (c) As for ORCA program, the corresponding reference have been recited which has been  
8 organized as references (Neese, 2012).

9 [1] Neese, F.: The ORCA program system, *WIREs Comput. Mol. Sci.*, 2, 73-78,  
10 <https://doi.org/10.1002/wcms.81>, 2012.
